# Supplementary material for: The oxidation mechanism of gas-phase ozonolysis of limonene in the atmosphere
Source: Royal Society of Chemistry journal article supplement (doi:10.1039/d0cp05803c), 2021-01-01
Supplement: d0cp05803c1.pdf [file d0cp05803c1.pdf]

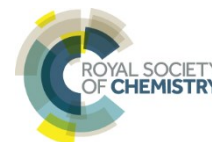

## Phys. Chem. Chem. Phys.

Supporting Information for

### Atmospheric Oxidation Mechanism of Gas-Phase Ozonolysis of Limonene in the Atmosphere.

Lingyu Wang<sup>a</sup> and Liming Wang<sup>a,b</sup>

<sup>(a)</sup> School of Chemistry & Chemical Engineering, South China University of Technology, Guangzhou, China 510640. E-mail: wanglm@scut.edu.cn.

<sup>(b)</sup> Guangdong Provincial Key Laboratory of Atmospheric Environment and Pollution Control, South China University of Technology, Guangzhou 510006, China

**Figure S1.** Time profiles of yields for Criegee intermediates in the reaction of Limonene and O<sub>3</sub> at 298 K and 760 Torr from RRKM-ME calculation.

**Figure S2.** Fractional yields of the Criegee intermediates and from 238 K to 328 K at 760 Torr from RRKM-ME calculation.

**Figure S3.** (A) The potential energy profiles of internal rotations for Syn-2a at M06-2X level. (B) The potential energy profiles of internal rotations for Syn-2b at M06-2X level. (C) The potential energy profiles of internal rotations for Anti-2b at M06-2X level.

**Figure S4.** The formation of CIs\* and their decay curve (molar fraction relative to limonene consumed) in the ozonolysis of limonene in the processes of limonene + O<sub>3</sub> → POZs → CI\* → P, in which CI is Anti-2b, Syn-2b, Syn-2a or Anti-2c, and P is SOZ, VHP, or Dioxirane. Five, one and zero of the internal rotations are treated as hindered rotors for isomerizations to SOZs, VHPs, and Dioxiranes, respectively.

**Figure S5.** The microcanonical rates of Criegee intermediates from RRKM theory. Five, one and zero of the internal rotations are treated as hindered rotors for isomerizations to SOZs, VHPs, and Dioxiranes, respectively.

**Figure S6.** (A). The normalized internal energy distributions in Syn-2a\* formed in the reaction of limonene + O<sub>3</sub> → POZs → Syn-2a\* when subject to isomerization to SOZ, VHP, or Dioxirane at different reaction time (from RRKM-ME calculations). (B). The normalized internal energy distributions in Syn-2b\* formed in the reaction of limonene + O<sub>3</sub> → POZs → Syn-2b\* when subject to isomerization to SOZ, VHP, or Dioxirane at different reaction time (from RRKM-ME calculations). (C). The normalized internal energy distributions in Anti-2b\* formed in the reaction of limonene + O<sub>3</sub> → POZs → Syn-2b\* when subject to isomerization to SOZ, VHP, or Dioxirane at different reaction time (from RRKM-ME calculations).

**Figure S7.** Prior distributions and unimolecular rates of Anti-2c at reaction time of 10<sup>-8</sup> s.

**Figure S8.** Decay of Anti-2c starting from the energy distributions, all at 298 K and 760 Torr. Initial fractions are 1.

**Figure S9.** Normalized energy distributions of SOZs from (A) Anti-2b, (B) Syn-2b and (C) Syn-2a (in the timescale of 10<sup>-8</sup> s<sup>-1</sup>) and *k*(*E*) of the decomposition of SOZs. Available energies are 445 kJ/mol (37200 cm<sup>-1</sup>).

**Table S1.** Geometries and harmonic vibrational frequencies of important species and transition states in reaction of limonene with O<sub>3</sub> at M06-2X/6-311++G(2df,2p) level.

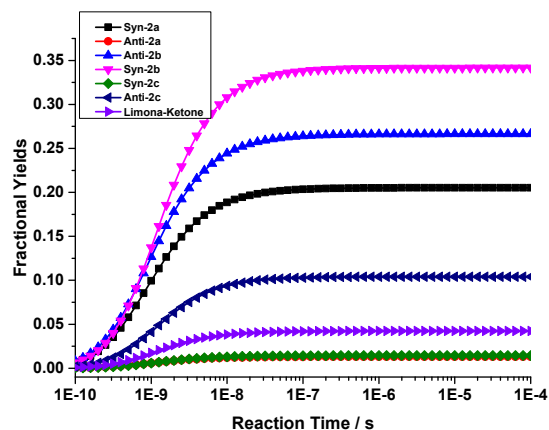

**Figure S1.** Time profiles of yields for Criegee intermediates in the reaction of Limonene and O<sub>3</sub> at 298 K and 760 Torr from RRKM-ME calculation.

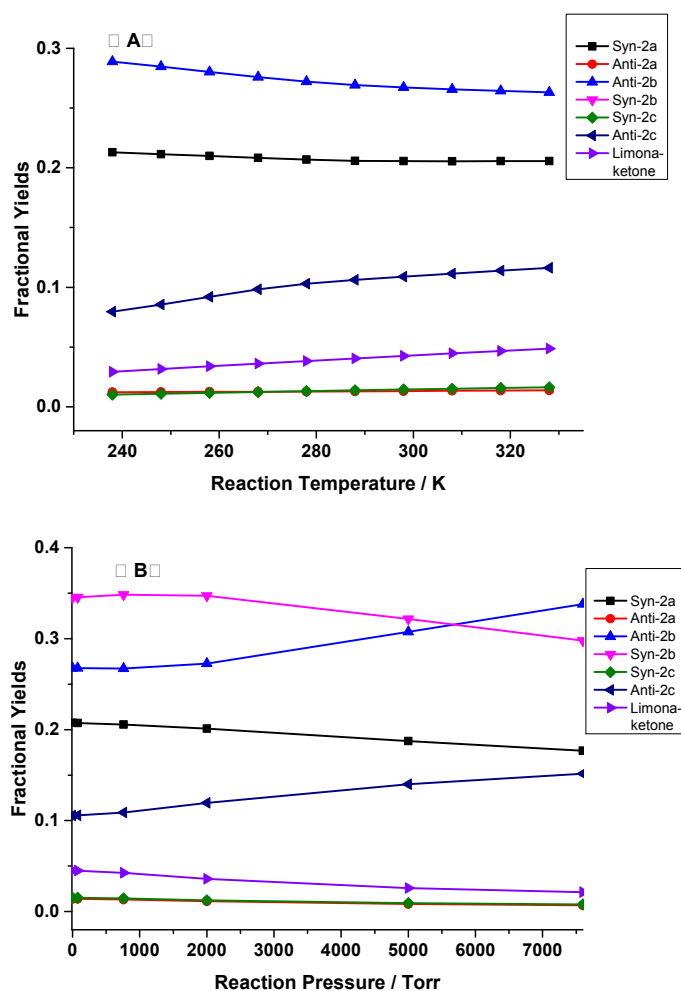

**Figure S2.** Fractional yields of the Criegee intermediates from (A) 238 K to 328 K at 760 Torr, (B) 0.76 Torr to 7600 Torr at 298 K from RRKM-ME calculation.

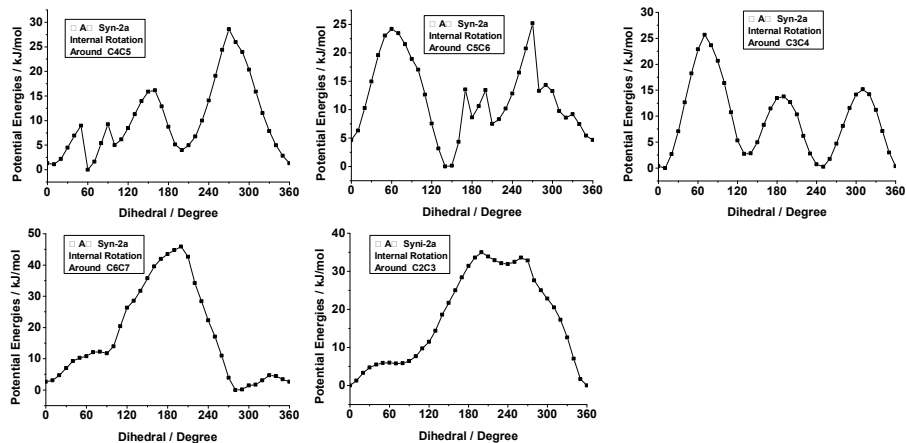

Figure S3(A) The potential energy profiles of internal rotations for Syn-2a at M06-2X level.

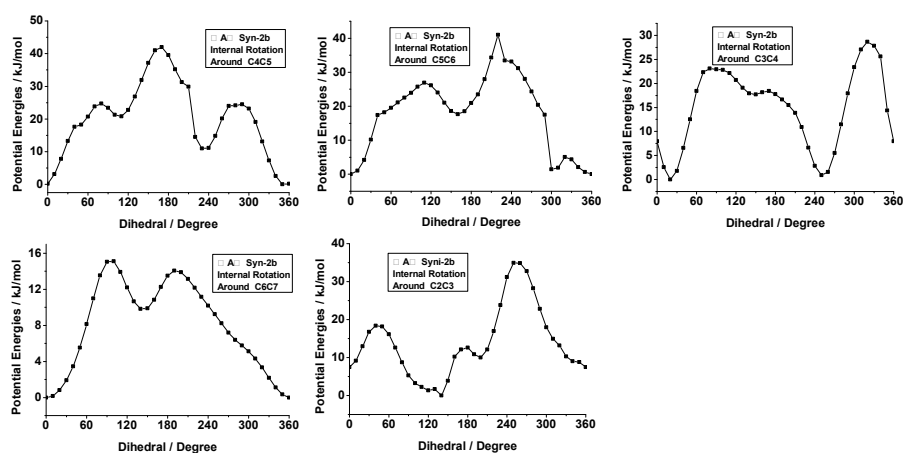

Figure S3(B) The potential energy profiles of internal rotations for Syn-2b at M06-2X level.

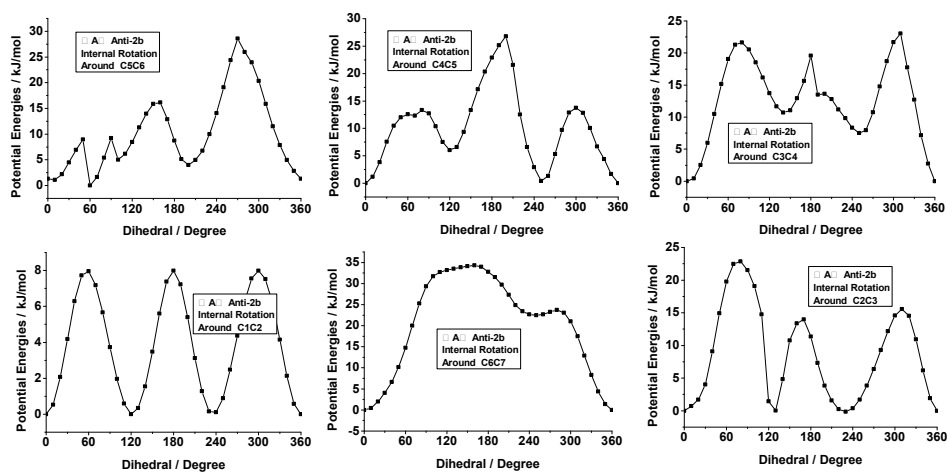

Figure S3(C) The potential energy profiles of internal rotations for Anti-2b at M06-2X level.

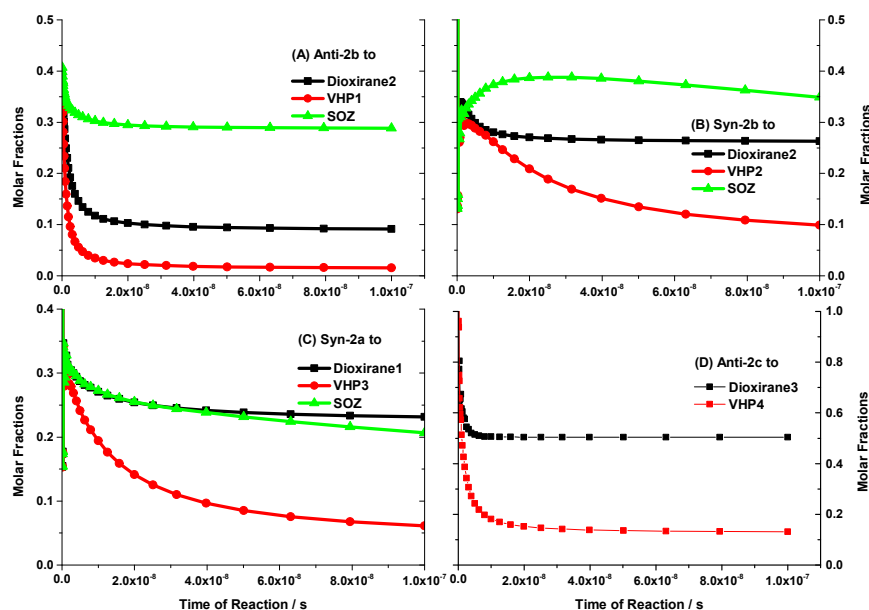

**Figure S4.** The formation of CIs\* and their decay curve (molar fraction relative to limonene consumed) in the ozonolysis of limonene in the processes of limonene + O<sub>3</sub> → POZs → CI\* → P, in which CI is Anti-2b, Syn-2b, Syn-2a or Anti-2c, and P is SOZ, VHP, or Dioxirane. Five, one and zero of the internal rotations are treated as hindered rotors for isomerizations to SOZs, VHPs, and Dioxiranes, respectively.

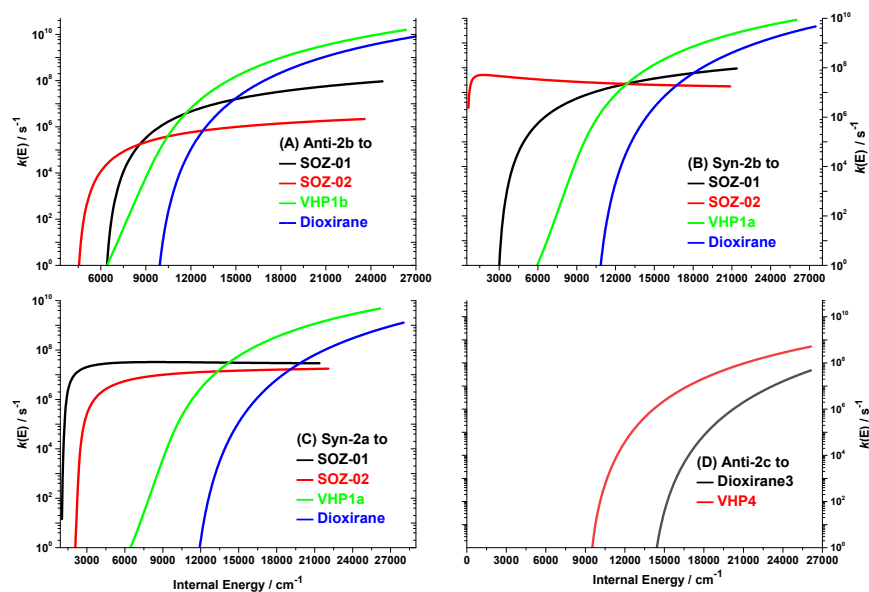

**Figure S5.** The microcanonical rates of Criegee intermediates from RRKM theory. Five, one and zero of the internal rotations are treated as hindered rotors for isomerizations to SOZs, VHPs, and Dioxiranes, respectively. Note that the rate coefficient for SOZ formation in Syn-2b decreases with increasing energy is an artifact of freezing some of the vibrational modes in the TS.

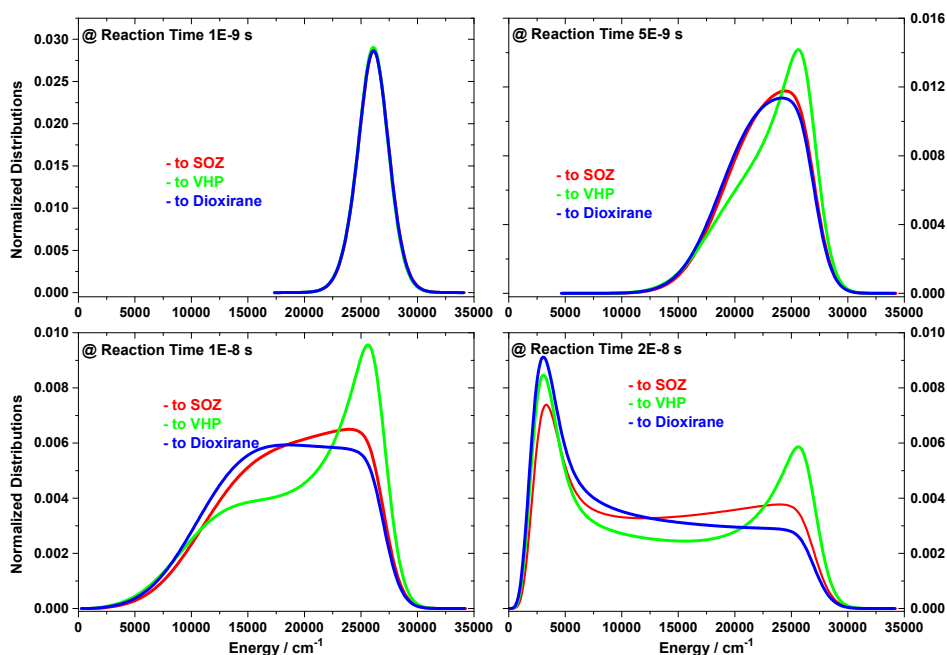

**Figure S6(A).** The normalized internal energy distributions in Syn-2a\* formed in the reaction of limonene + O<sub>3</sub> → POZs → Syn-2a\* when subject to isomerization to SOZ, VHP, or Dioxirane at different reaction time (from RRKM-ME calculations)

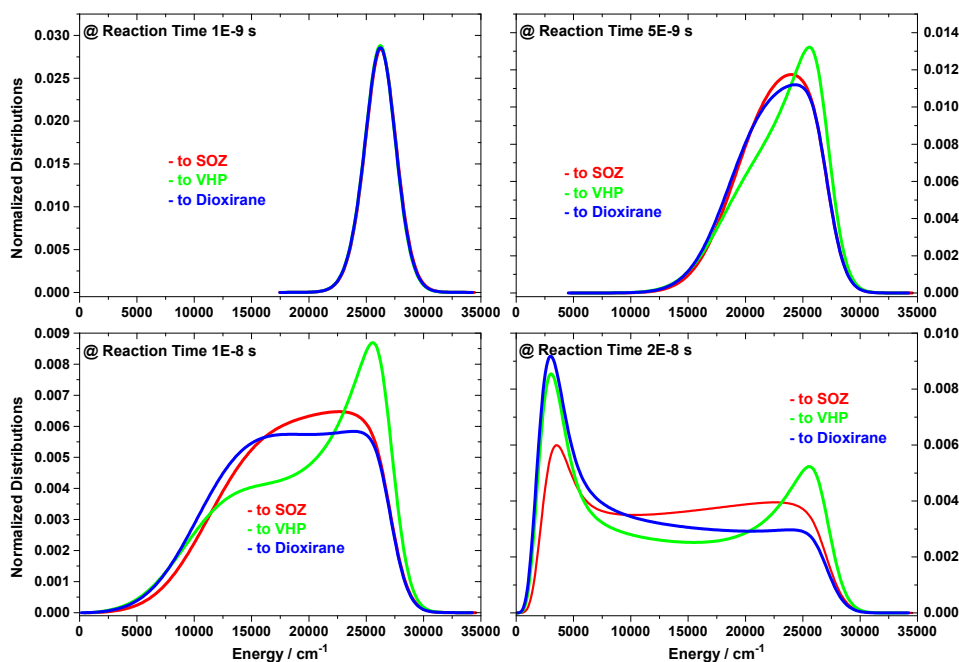

**Figure S6(B).** The normalized internal energy distributions in Syn-2b\* formed in the reaction of limonene + O<sub>3</sub> → POZs → Syn-2b\* when subject to isomerization to SOZ, VHP, or Dioxirane at different reaction time (from RRKM-ME calculations)

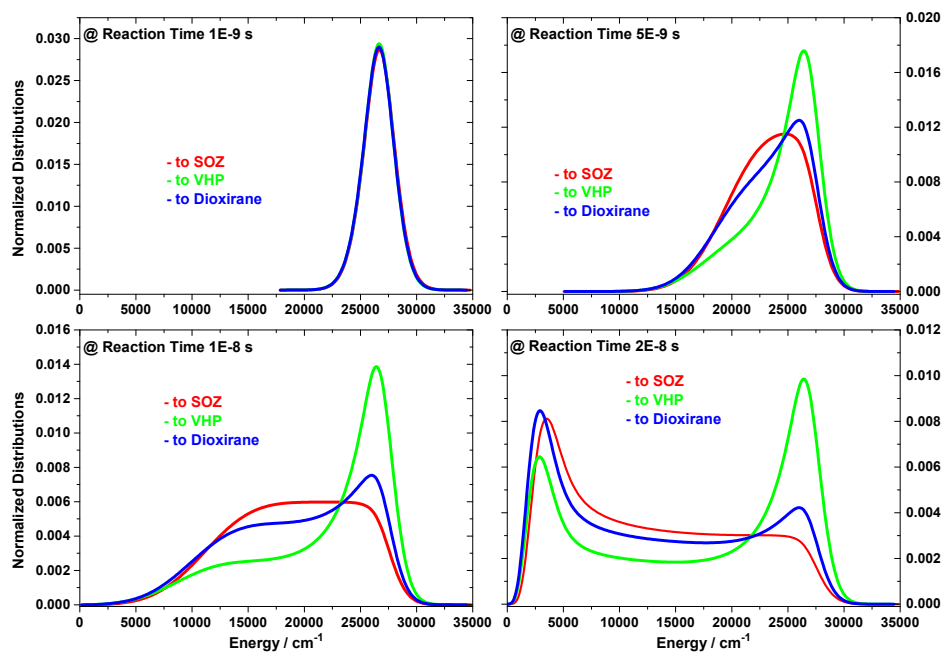

**Figure S6(C).** The normalized internal energy distributions in Anti-2b\* formed in the reaction of limonene + O<sub>3</sub> → POZs → Syn-2b\* when subject to isomerization to SOZ, VHP, or Dioxirane at different reaction time (from RRKM-ME calculations)

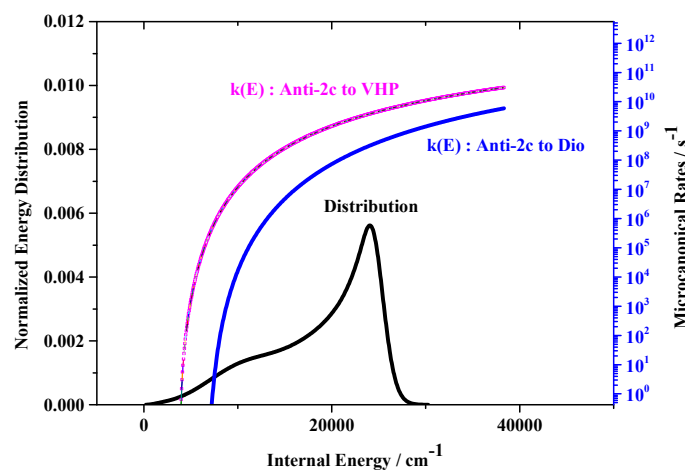

**Figure S7.** Prior distributions and unimolecular rates of Anti-2c at reaction time of 10<sup>-8</sup> s.

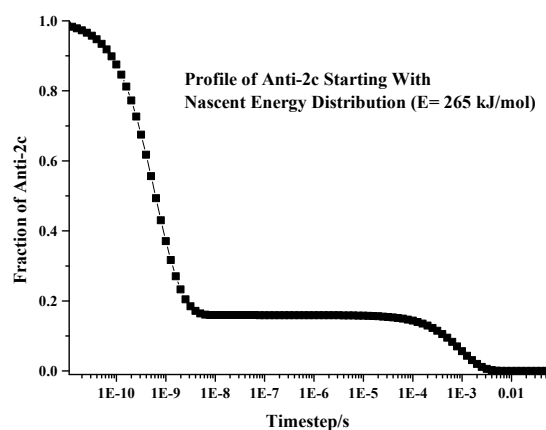

**Figure S8.** Decay of Anti-2c starting from the energy distributions, all at 298 K and 760 Torr. Initial fractions are 1.

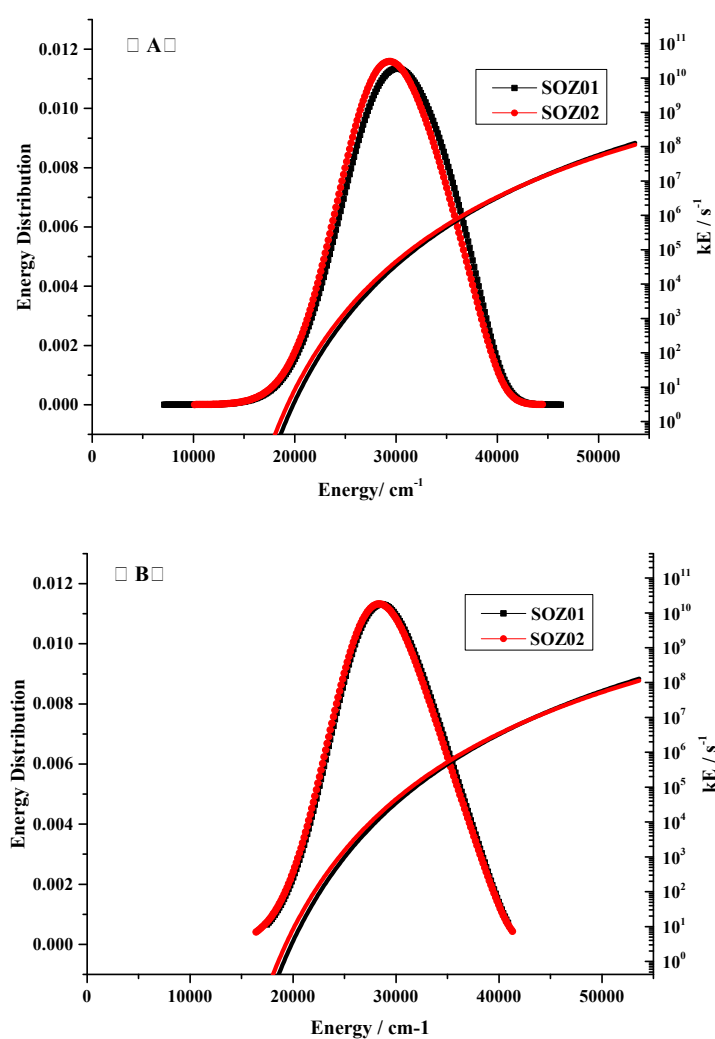

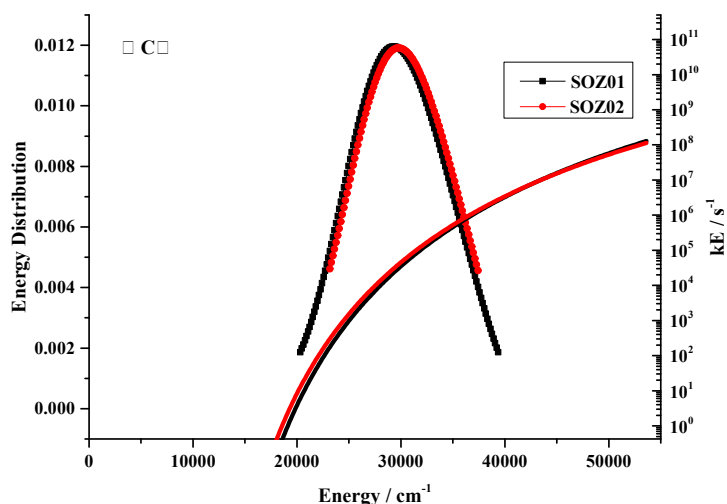

**Figure S9.** Normalized energy distributions of SOZs from (A) Anti-2b, (B) Syn-2b and (C) Syn-2a (in the timescale of  $10^{-8}$  s $^{-1}$ ) and  $k(E)$  of the decomposition of SOZs. Available energies are 445 kJ/mol ( $37200$  cm $^{-1}$ ).

**Table S1.** Geometries and harmonic vibrational frequencies of important species and transition states in reaction of limonene with O<sub>3</sub> at M06-2X/6-311++G(2df,2p) level.

| Cartesian Coordinates (in Angstrom)                                                | Vibrational Frequencies |           |           |
|------------------------------------------------------------------------------------|-------------------------|-----------|-----------|
| Elements                                                                           | (in cm $^{-1}$ )        |           |           |
| limonene                                                                           |                         |           |           |
| 0,1                                                                                |                         |           |           |
| C,0,-0.0088230586,-1.1865075526,-0.3162787206                                      | 63.0211                 | 79.5179   | 167.1485  |
| C,0,1.4827320972,-1.1100334064,-0.6231341116                                       | 183.9152                | 191.6462  | 224.8378  |
| C,0,2.1634034674,0.0453618914,0.0642718339                                         | 267.5967                | 314.7646  | 334.3557  |
| C,0,1.4656934497,1.0411176037,0.6015793516                                         | 358.6328                | 437.4452  | 450.7528  |
| C,0,-0.0326819544,1.1520614107,0.5524119296                                        | 494.8709                | 532.1807  | 559.5492  |
| C,0,-0.6621163764,0.1833298915,-0.4616320301                                       | 654.8884                | 723.5392  | 785.7399  |
| H,0,1.9753447787,-2.0402863113,-0.3269731233                                       | 823.47                  | 825.0301  | 914.5445  |
| H,0,1.6429057884,-1.022410969,-1.7039469774                                        | 937.7686                | 939.456   | 950.5773  |
| H,0,-0.4162865409,0.5641763956,-1.462030558                                        | 983.3544                | 1009.0931 | 1022.1575 |
| H,0,-0.1498843549,-1.5398824474,0.7094991056                                       | 1044.6067               | 1053.4856 | 1063.5269 |
| H,0,1.9975932333,1.8420680244,1.1055384051                                         | 1086.2192               | 1113.445  | 1151.238  |
| H,0,-0.3055983105,2.1804373688,0.3072959139                                        | 1176.5688               | 1187.5311 | 1229.5816 |
| H,0,-0.4570021889,0.9546089973,1.5440560887                                        | 1274.2144               | 1284.1046 | 1320.9798 |
| H,0,-0.4895943015,-1.9095176342,-0.9764147063                                      | 1335.4399               | 1344.6121 | 1366.8686 |
| C,0,3.6620532667,-0.0027347337,0.0982961427                                        | 1406.2924               | 1412.9218 | 1418.283  |
| H,0,4.0670037165,-0.0800537581,-0.9137824218                                       | 1420.2808               | 1459.192  | 1478.6145 |
| H,0,4.0829011402,0.8833538685,0.5702020642                                         | 1484.5564               | 1484.951  | 1491.725  |
| H,0,4.0076274543,-0.8838353467,0.6439968186                                        | 1497.1625               | 1501.761  | 1508.8411 |
| C,0,-2.1685917755,0.1861309403,-0.3416680491                                       | 1737.7254               | 1768.9032 | 3004.0374 |
| C,0,-2.835669924,1.5084232105,-0.6082888598                                        | 3023.546                | 3027.0188 | 3036.582  |
| H,0,-3.91819015,1.4042137985,-0.6414473853                                         | 3040.7038               | 3051.6328 | 3060.9073 |
| H,0,-2.5894109887,2.2360774095,0.1673288472                                        | 3084.7335               | 3090.6415 | 3095.2572 |
| H,0,-2.4965970285,1.9284358083,-1.5580286794                                       | 3111.4401               | 3128.1505 | 3137.0385 |
| C,0,-2.878929813,-0.8865833423,-0.0114846939                                       | 3142.3943               | 3155.4926 | 3235.2026 |
| H,0,-2.4218684257,-1.8446885335,0.1918624345                                       |                         |           |           |
| H,0,-3.9572109009,-0.834518934,0.0667712207                                        |                         |           |           |
| UM06-2X/6-311++G(2df,2p): E = -390.381391 Hartree                                  |                         |           |           |
| RHF-UCCSD(T)-F12a/cc-pVDZ-F12 // M06-2X/6-311++G(2df,2p): E = -389.8616086 Hartree |                         |           |           |



|                                                                                                                                                                                                                                                                                                                                                                                                                                                                                                                                                                                                                                                                                                                                                                                                                                                                                                                                                                                                                                                                                                                                                                                                                                                                                                                                                                                                                                         |                                                                                                                                                                                                                                                                                                                                                                                                                                                                                                                                                                                                                                                                                                                                                                                                                                                                           |
|-----------------------------------------------------------------------------------------------------------------------------------------------------------------------------------------------------------------------------------------------------------------------------------------------------------------------------------------------------------------------------------------------------------------------------------------------------------------------------------------------------------------------------------------------------------------------------------------------------------------------------------------------------------------------------------------------------------------------------------------------------------------------------------------------------------------------------------------------------------------------------------------------------------------------------------------------------------------------------------------------------------------------------------------------------------------------------------------------------------------------------------------------------------------------------------------------------------------------------------------------------------------------------------------------------------------------------------------------------------------------------------------------------------------------------------------|---------------------------------------------------------------------------------------------------------------------------------------------------------------------------------------------------------------------------------------------------------------------------------------------------------------------------------------------------------------------------------------------------------------------------------------------------------------------------------------------------------------------------------------------------------------------------------------------------------------------------------------------------------------------------------------------------------------------------------------------------------------------------------------------------------------------------------------------------------------------------|
| O <sub>3</sub><br>0,1<br>O,0,-1.0370035806,2.3522674055,-0.02985346<br>O,0,0.1893212393,2.2570652672,-0.02985346<br>O,0,-1.5361006987,3.4764729374,-0.02985346                                                                                                                                                                                                                                                                                                                                                                                                                                                                                                                                                                                                                                                                                                                                                                                                                                                                                                                                                                                                                                                                                                                                                                                                                                                                          | 796.6021    1376.8923    1384.4189                                                                                                                                                                                                                                                                                                                                                                                                                                                                                                                                                                                                                                                                                                                                                                                                                                        |
| UM06-2X/6-311++G(2df,2p): E = -390.381391 Hartree<br>RHF-UCCSD(T)-F12a/cc-pVDZ-F12 // M06-2X/6-311++G(2df,2p): E = -389.8616086 Hartree                                                                                                                                                                                                                                                                                                                                                                                                                                                                                                                                                                                                                                                                                                                                                                                                                                                                                                                                                                                                                                                                                                                                                                                                                                                                                                 |                                                                                                                                                                                                                                                                                                                                                                                                                                                                                                                                                                                                                                                                                                                                                                                                                                                                           |
| PRC1<br>0,1<br>C,0,-0.9690472608,-1.5994351792,-0.6217680281<br>C,0,0.5196832247,-1.7862383163,-0.8972975958<br>C,0,1.3976303127,-1.1740727089,0.164243023<br>C,0,0.913825762,-0.2950537692,1.0411658146<br>C,0,-0.5147042654,0.1751392247,1.0726132104<br>C,0,-1.2695569744,-0.1587718759,-0.2232182571<br>H,0,0.7569814385,-2.8499196973,-0.9856044529<br>H,0,0.7821844874,-1.3467803914,-1.8675895719<br>H,0,-0.8675990774,0.4951130995,-1.0097059909<br>H,0,-1.2740114423,-2.262567981,0.1930603792<br>H,0,1.5786233428,0.1100933132,1.7974001593<br>H,0,-0.5348149033,1.2508998636,1.2538805727<br>H,0,-1.0398810859,-0.2876618009,1.9165875396<br>H,0,-1.5488795401,-1.8799461469,-1.5019741906<br>C,0,2.8254721207,-1.6352761423,0.183905676<br>H,0,3.2718321215,-1.5584095537,-0.809615963<br>H,0,3.4267562438,-1.0499759559,0.8773572944<br>H,0,2.880223148,-2.6866632701,0.4764976192<br>C,0,-2.7376014243,0.1749542456,-0.0914886886<br>C,0,-3.0462332265,1.6217905827,0.1842973307<br>H,0,-4.1127343486,1.8202542837,0.1008204786<br>H,0,-2.7270383948,1.9055560697,1.1888044622<br>H,0,-2.513376759,2.2720974687,-0.5131324609<br>C,0,-3.7064545177,-0.7280016784,-0.1943172961<br>H,0,-3.5079545833,-1.77416281,-0.3802105807<br>H,0,-4.7447754704,-0.440483425,-0.0898097191<br>O,0,1.580043065,1.6005162922,-1.4648987035<br>O,0,1.3079006645,2.2208084802,-0.4356423061<br>O,0,2.6066274125,0.9219396385,-1.4734752645 | 30.896 46.6747 51.8744<br>68.3412 97.4068 112.9331<br>127.3 172.8725 186.4739<br>202.5265 213.7056 235.2516<br>277.7793 314.2992 339.195<br>360.4218 443.6598 451.4593<br>491.909 535.969 555.6255<br>654.3684 726.4415 784.9969<br>794.9196 824.1336 831.9194<br>914.7948 938.0461 941.7176<br>951.6726 980.7966 1009.5699<br>1021.4429 1051.0209 1055.1949<br>1062.9417 1084.9632 1114.9228<br>1149.1554 1176.2153 1189.0726<br>1234.9344 1278.9511 1286.9386<br>1316.8745 1337.9772 1344.2834<br>1359.8429 1363.9073 1380.6551<br>1406.0636 1410.4455 1421.7485<br>1424.3619 1455.7049 1481.1733<br>1484.6589 1485.954 1491.7769<br>1500.3139 1502.3118 1509.9323<br>1730.1475 1740.6565 2998.2954<br>3020.2469 3020.896 3040.6344<br>3041.4862 3045.7632 3064.1403<br>3080.3437 3094.1427 3100.1599<br>3103.0413 3139.3705 3147.7666<br>3155.6601 3158.6521 3239.7253 |
| UM06-2X/6-311++G(2df,2p): E = -615.7746242 Hartree<br>RHF-UCCSD(T)-F12a/cc-pVDZ-F12 // M06-2X/6-311++G(2df,2p): E = -615.0734527 Hartree                                                                                                                                                                                                                                                                                                                                                                                                                                                                                                                                                                                                                                                                                                                                                                                                                                                                                                                                                                                                                                                                                                                                                                                                                                                                                                |                                                                                                                                                                                                                                                                                                                                                                                                                                                                                                                                                                                                                                                                                                                                                                                                                                                                           |
| TS1<br>0,1<br>C,0,-0.9566696843,-1.5848758278,-0.6429914201<br>C,0,0.5235987518,-1.7581070567,-0.9766859121<br>C,0,1.4398635667,-0.9885341568,-0.0530805717<br>C,0,0.9425873157,-0.1880234912,0.9429091112<br>C,0,-0.4931927328,0.2395683846,0.9807023001<br>C,0,-1.2646959749,-0.1329460493,-0.297355535<br>H,0,0.8014647746,-2.8131717977,-0.8968671992<br>H,0,0.7232180099,-1.4745519922,-2.011036991<br>H,0,-0.8815575689,0.4944184449,-1.1116775959<br>H,0,-1.2178311644,-2.2150115815,0.2124378164<br>H,0,1.5509114075,0.0107168013,1.8162596445<br>H,0,-0.5280916234,1.3174573087,1.1519753047<br>H,0,-0.989548281,-0.2240666033,1.8412632465<br>H,0,-1.5649602054,-1.9175380293,-1.4840648114<br>C,0,2.8787647215,-1.3922070645,-0.0531653929                                                                                                                                                                                                                                                                                                                                                                                                                                                                                                                                                                                                                                                                                   | -343.8054    49.1825    57.3681<br>92.2096    135.0734    155.7432<br>182.2718    197.325    203.1317<br>217.9537    232.7686    278.9878<br>312.4538    342.7231    371.4544<br>444.5864    475.5644    486.4824<br>503.077    553.642    567.573<br>658.2469    729.7364    779.9842<br>794.4707    816.1725    865.9931<br>911.1193    929.8017    934.1499<br>955.9881    966.5885    1003.0454<br>1019.8073    1041.8025    1051.4002<br>1058.6265    1077.6416    1114.6441<br>1146.9448    1162.5908    1182.9021<br>1215.2667    1230.5717    1270.934                                                                                                                                                                                                                                                                                                            |

|                                                                                    |           |           |           |
|------------------------------------------------------------------------------------|-----------|-----------|-----------|
| H,0,3.253635504,-1.4469195652,-1.0757915624                                        | 1272.0776 | 1285.0459 | 1318.7163 |
| H,0,3.4859063778,-0.6780242464,0.4992753613                                        | 1324.1789 | 1346.471  | 1367.9091 |
| H,0,2.992633849,-2.3826622245,0.3946147293                                         | 1393.5903 | 1411.0593 | 1414.0059 |
| C,0,-2.7326733073,0.1898251552,-0.137713318                                        | 1420.0026 | 1456.6288 | 1467.8687 |
| C,0,-3.05581895,1.6482573396,0.0405300322                                          | 1477.8574 | 1483.1079 | 1491.3689 |
| H,0,-4.1295943926,1.8208872626,0.008871358                                         | 1497.2327 | 1501.5755 | 1507.8406 |
| H,0,-2.6821097149,2.0210677634,0.9959220643                                        | 1610.1391 | 1734.3923 | 3015.2091 |
| H,0,-2.5822573383,2.2463267272,-0.7409768134                                       | 3027.37   | 3040.5764 | 3043.7483 |
| C,0,-3.6871361692,-0.733746591,-0.1404803565                                       | 3046.7037 | 3050.2124 | 3090.8368 |
| H,0,-3.4759206131,-1.7869572625,-0.2619763102                                      | 3091.2852 | 3105.5191 | 3108.1161 |
| H,0,-4.7262945639,-0.4566583485,-0.0192645133                                      | 3114.3529 | 3138.0702 | 3158.2326 |
| O,0,1.4333561932,1.7050410787,-0.8126610106                                        | 3158.3978 | 3182.7501 | 3238.7404 |
| O,0,1.9475288852,1.6847724479,0.3423521941                                         |           |           |           |
| O,0,1.8073321975,0.7206036042,-1.518562869                                         |           |           |           |
| UM06-2X/6-311++G(2df,2p): E = -615.7671373 Hartree                                 |           |           |           |
| RHF-UCCSD(T)-F12a/cc-pVDZ-F12 // M06-2X/6-311++G(2df,2p): E = -615.0666574 Hartree |           |           |           |
| POZI                                                                               |           |           |           |
| 0,1                                                                                |           |           |           |
| C,0,-0.5618791836,-1.150950869,-1.1272568826                                       | 26.8902   | 63.8115   | 134.9323  |
| C,0,0.8858653374,-0.98020298,-1.5812440745                                         | 145.3122  | 178.3016  | 187.0459  |
| C,0,1.7903792898,-0.4308900535,-0.4777335718                                       | 209.2364  | 239.0469  | 262.7777  |
| C,0,1.1741450344,0.7740336553,0.2423437413                                         | 294.994   | 354.7539  | 376.1027  |
| C,0,-0.312052589,0.686480132,0.5374890865                                          | 392.7331  | 444.3745  | 450.6052  |
| C,0,-1.1382434072,0.1797289242,-0.6519571352                                       | 488.1659  | 543.5282  | 550.8564  |
| H,0,1.299860433,-1.9270015996,-1.930938183                                         | 623.442   | 659.9419  | 725.5851  |
| H,0,0.9166084649,-0.281586513,-2.418049267                                         | 747.0094  | 763.4876  | 812.4989  |
| H,0,-1.0174534846,0.9086302096,-1.4628561853                                       | 875.31    | 891.6109  | 915.0385  |
| H,0,-0.6248247259,-1.8856106961,-0.3180255183                                      | 924.1791  | 944.0774  | 959.9384  |
| H,0,1.7334231198,0.9507525745,1.1658694611                                         | 972.1876  | 995.7143  | 1010.9761 |
| H,0,-0.6497297468,1.6687039458,0.8679122482                                        | 1021.2213 | 1043.6945 | 1051.2935 |
| H,0,-0.4492920721,0.0031935209,1.381956833                                         | 1065.9009 | 1080.2394 | 1100.8634 |
| H,0,-1.1549958034,-1.5433820257,-1.9539654485                                      | 1147.3823 | 1176.2025 | 1187.9717 |
| C,0,2.2948912938,-1.4938886629,0.472520439                                         | 1212.4513 | 1263.057  | 1270.8523 |
| H,0,2.8305046567,-2.2655737202,-0.0781323229                                       | 1291.005  | 1312.2829 | 1318.5472 |
| H,0,2.9622951476,-1.0617997759,1.2161443                                           | 1343.8299 | 1364.0193 | 1374.7621 |
| H,0,1.452633365,-1.9602436369,0.9834002567                                         | 1388.5849 | 1412.1445 | 1416.3501 |
| C,0,-2.6089773697,0.145630165,-0.3009639256                                        | 1421.6236 | 1427.2836 | 1459.8118 |
| C,0,-3.2354117926,1.4803434619,0.0025241333                                        | 1475.1715 | 1488.4184 | 1489.3965 |
| H,0,-4.3184957504,1.3992501202,0.064798758                                         | 1493.125  | 1499.963  | 1509.1215 |
| H,0,-2.8745240081,1.8817134753,0.9510241247                                        | 1510.8524 | 1735.6683 | 3020.5653 |
| H,0,-2.9835823587,2.2107861051,-0.7690349536                                       | 3035.7309 | 3040.9267 | 3042.9647 |
| C,0,-3.3226004063,-0.9736971342,-0.2566102422                                      | 3058.1716 | 3059.4091 | 3063.4896 |
| H,0,-2.8963360626,-1.944203923,-0.4680065484                                       | 3090.3832 | 3093.3638 | 3104.9433 |
| H,0,-4.3748342837,-0.9490485338,-0.0048577184                                      | 3111.6261 | 3136.9282 | 3139.3571 |
| O,0,2.4001051974,1.371278222,-1.6073048773                                         | 3143.9817 | 3162.6385 | 3246.4899 |
| O,0,1.4343483585,1.8516364664,-0.648682089                                         |           |           |           |
| O,0,2.9360018262,0.2113269156,-1.0371523582                                        |           |           |           |
| UM06-2X/6-311++G(2df,2p): E = -615.881057 Hartree                                  |           |           |           |
| RHF-UCCSD(T)-F12a/cc-pVDZ-F12 // M06-2X/6-311++G(2df,2p): E = -615.1608158 Hartree |           |           |           |
| PRC2                                                                               |           |           |           |
| 0,1                                                                                |           |           |           |
| C,0,0.0686669753,1.5143225688,0.1061314488                                         | 27.701    | 39.3526   | 61.9771   |
| C,0,-1.3664520358,1.6416888709,-0.3949703019                                       | 78.9067   | 94.9684   | 117.089   |
| C,0,-2.1763118465,0.3918011406,-0.1625897559                                       | 125.4909  | 148.9167  | 180.7299  |
| C,0,-1.5981584958,-0.7601287271,0.1838743763                                       | 185.2983  | 210.2682  | 251.2942  |
| C,0,-0.1151939999,-0.9673631096,0.2823299233                                       | 285.5419  | 314.6764  | 334.5084  |
| C,0,0.6804813465,0.1908364956,-0.3401062895                                        | 360.008   | 444.0495  | 456.8296  |

|                                                                                    |           |           |           |
|------------------------------------------------------------------------------------|-----------|-----------|-----------|
| H,0,-1.8656026568,2.4783630118,0.1017331913                                        | 490.3551  | 532.5031  | 557.17    |
| H,0,-1.3755517358,1.8815459578,-1.4630558504                                       | 655.2407  | 726.4436  | 783.8943  |
| H,0,0.5527929008,0.1146011966,-1.427639763                                         | 799.1978  | 821.8421  | 832.112   |
| H,0,0.0777917515,1.5605588146,1.1993186072                                         | 915.8002  | 937.2255  | 941.4554  |
| H,0,-2.2266986877,-1.6166185342,0.4074335418                                       | 950.0375  | 979.6127  | 1008.4743 |
| H,0,0.1373239925,-1.9062831876,-0.2144902559                                       | 1021.202  | 1047.2903 | 1051.29   |
| H,0,0.1793361093,-1.0845790604,1.331990496                                         | 1060.8801 | 1083.3638 | 1113.4008 |
| H,0,0.664901463,2.3516920665,-0.2580085748                                         | 1151.1097 | 1178.2901 | 1187.9694 |
| C,0,-3.6621049855,0.5244164799,-0.3170357083                                       | 1231.1164 | 1275.5116 | 1285.6087 |
| H,0,-3.9110912624,0.9068428744,-1.3105386301                                       | 1321.058  | 1335.9241 | 1339.6304 |
| H,0,-4.1692121901,-0.4291282573,-0.1743885962                                      | 1346.3065 | 1367.7326 | 1373.0722 |
| H,0,-4.0650830371,1.2396590195,0.4036827021                                        | 1405.859  | 1410.6123 | 1417.9704 |
| C,0,2.1552569492,0.0410636652,-0.0489201947                                        | 1420.1512 | 1454.4715 | 1478.3333 |
| C,0,2.796966114,-1.2065455024,-0.5936571287                                        | 1481.1977 | 1485.5522 | 1487.973  |
| H,0,3.879591843,-1.1695046234,-0.4916866792                                        | 1496.1903 | 1498.5888 | 1505.2421 |
| H,0,2.4383593415,-2.0937319775,-0.0680546879                                       | 1734.9571 | 1736.6628 | 3009.6262 |
| H,0,2.5491130591,-1.3406609189,-1.6487955881                                       | 3021.546  | 3035.9948 | 3038.6647 |
| C,0,2.8584920269,0.9254935121,0.6495530219                                         | 3040.0526 | 3043.1799 | 3069.4553 |
| H,0,2.4182896404,1.8233465319,1.0596590862                                         | 3080.3389 | 3088.8235 | 3099.3139 |
| H,0,3.9139260958,0.7714486376,0.8346348069                                         | 3101.0771 | 3132.0877 | 3137.9475 |
| O,0,-2.4223483451,-1.3449890439,-2.7817333935                                      | 3140.2968 | 3154.4372 | 3237.5531 |
| O,0,-1.8714581964,-2.2661066398,-2.1739871937                                      |           |           |           |
| O,0,-1.7957775541,-0.2889325814,-2.90270279                                        |           |           |           |
| UM06-2X/6-311++G(2df,2p): E = -615.7761686 Hartree                                 |           |           |           |
| RHF-UCCSD(T)-F12a/cc-pVDZ-F12 // M06-2X/6-311++G(2df,2p): E = -615.0746576 Hartree |           |           |           |
| TS2                                                                                |           |           |           |
| 0,1                                                                                |           |           |           |
| C,0,0.6554829902,1.1158502768,-0.9346830409                                        | -302.8742 | 44.1324   | 52.2391   |
| C,0,-0.8604647057,1.2515945051,-1.0701225672                                       | 82.0218   | 126.616   | 140.7795  |
| C,0,-1.6235538597,0.6812646495,0.0991788488                                        | 170.1913  | 186.3853  | 195.9562  |
| C,0,-0.9849689567,0.0161616464,1.1090862619                                        | 212.5973  | 227.5978  | 269.4498  |
| C,0,0.4677548576,-0.3410945933,1.0630661918                                        | 315.7612  | 342.6985  | 371.1701  |
| C,0,1.032227497,-0.2463925311,-0.3615882392                                        | 448.0378  | 460.9712  | 465.7932  |
| H,0,-1.1359506112,2.3056135814,-1.1665345074                                       | 499.5621  | 556.483   | 559.3468  |
| H,0,-1.2030352341,0.7675398703,-1.9879031674                                       | 655.1975  | 733.6835  | 779.9487  |
| H,0,0.524858054,-1.0175970814,-0.9542809246                                        | 795.632   | 818.9126  | 858.3521  |
| H,0,1.0376252636,1.8961871026,-0.2697798444                                        | 912.4149  | 936.2541  | 937.8513  |
| H,0,-1.5032431591,-0.1166159082,2.0521234541                                       | 956.0124  | 966.5797  | 1004.6496 |
| H,0,0.5897576533,-1.3479187881,1.4642105525                                        | 1018.854  | 1043.0977 | 1054.772  |
| H,0,1.0353524602,0.329640562,1.7188919054                                          | 1060.954  | 1080.3152 | 1117.972  |
| H,0,1.1239743395,1.2663353472,-1.9074756537                                        | 1145.6685 | 1166.354  | 1184.5631 |
| C,0,-3.0503632914,1.113411867,0.2644287118                                         | 1219.0987 | 1234.348  | 1275.5663 |
| H,0,-3.5430995678,1.2072398056,-0.7025077838                                       | 1286.8564 | 1290.4464 | 1320.7711 |
| H,0,-3.6085531239,0.4000961253,0.8723577748                                        | 1332.4977 | 1349.7672 | 1370.8388 |
| H,0,-3.0978604847,2.0854076677,0.7615895017                                        | 1401.4791 | 1413.7943 | 1414.6459 |
| C,0,2.5111864008,-0.5554500785,-0.3734420566                                       | 1423.428  | 1455.7886 | 1473.4999 |
| C,0,2.8793785107,-1.9609931354,0.0166941126                                        | 1479.1095 | 1487.7116 | 1489.6452 |
| H,0,3.9398543269,-2.1483741417,-0.1388465976                                       | 1491.3264 | 1501.1705 | 1510.1558 |
| H,0,2.6529961437,-2.1513775075,1.0672057235                                        | 1619.0171 | 1730.2683 | 3024.4343 |
| H,0,2.3065108872,-2.6844391383,-0.5671340835                                       | 3036.8243 | 3040.5878 | 3043.9634 |
| C,0,3.4413848455,0.3369775161,-0.6946922711                                        | 3047.4844 | 3052.4686 | 3080.9441 |
| H,0,3.1991810224,1.3525287831,-0.9750589009                                        | 3095.8083 | 3101.5208 | 3106.1537 |
| H,0,4.4906654563,0.0715227446,-0.6861945175                                        | 3107.8373 | 3135.1872 | 3136.9163 |
| O,0,-2.595124904,-1.8750534184,-0.0770792038                                       | 3154.7483 | 3160.1275 | 3239.4393 |
| O,0,-1.6846251503,-2.1037652046,0.7627398657                                       |           |           |           |
| O,0,-2.18803919,-1.2163578941,-1.071622355                                         |           |           |           |
| UM06-2X/6-311++G(2df,2p): E = -615.7704613 Hartree                                 |           |           |           |

| RHF-UCCSD(T)-F12a/cc-pVDZ-F12 // M06-2X/6-311++G(2df,2p): E = -615.0699531 Hartree |           |           |           |
|------------------------------------------------------------------------------------|-----------|-----------|-----------|
| POZ2                                                                               |           |           |           |
| 0,1                                                                                |           |           |           |
| C,0,-0.6395470177,-0.9572263026,-1.1793307158                                      | 29.0571   | 47.8638   | 123.946   |
| C,0,0.6748501165,-1.5101323678,-0.6177030435                                       | 151.5975  | 163.86    | 194.6341  |
| C,0,1.6682292114,-0.4385117813,-0.2022056415                                       | 234.949   | 268.4766  | 273.5202  |
| C,0,1.0417813208,0.5915341396,0.7836224643                                         | 297.2227  | 336.7838  | 367.3011  |
| C,0,-0.4658618067,0.4637949306,0.9148397412                                        | 391.5617  | 440.6566  | 496.9302  |
| C,0,-1.1216551298,0.3230383804,-0.4668315559                                       | 506.5153  | 527.2378  | 570.446   |
| H,0,0.4831294605,-2.1156077927,0.2713529801                                        | 628.4056  | 657.1555  | 724.8829  |
| H,0,1.1502899195,-2.1720367107,-1.3429684276                                       | 735.6054  | 768.21    | 804.7797  |
| H,0,-0.7687092356,1.1765611387,-1.0499011556                                       | 876.7808  | 903.7069  | 916.4355  |
| H,0,-1.3921674662,-1.7404831252,-1.1138954497                                      | 929.9435  | 940.0503  | 945.1393  |
| H,0,1.540833303,0.5364315236,1.7541883574                                          | 951.6853  | 1005.4186 | 1015.2496 |
| H,0,-0.8506874615,1.3408313654,1.4377920092                                        | 1018.4468 | 1033.086  | 1040.6056 |
| H,0,-0.7040363275,-0.4039059676,1.5352642407                                       | 1061.9412 | 1075.6514 | 1100.9668 |
| H,0,-0.5165283937,-0.7354921503,-2.2385273578                                      | 1140.6768 | 1152.7556 | 1164.4299 |
| C,0,2.9655864506,-1.0187729672,0.3317734146                                        | 1224.6164 | 1255.8826 | 1262.1125 |
| H,0,3.4037936928,-1.6941025451,-0.4021183902                                       | 1277.2916 | 1301.5238 | 1321.7887 |
| H,0,3.6738975192,-0.2194172051,0.5446392315                                        | 1347.2741 | 1362.8848 | 1370.3841 |
| H,0,2.7814536711,-1.5741185688,1.2519836137                                        | 1385.3422 | 1406.9138 | 1409.1134 |
| C,0,-2.6248238702,0.465371237,-0.3308914382                                        | 1412.9616 | 1420.6539 | 1455.1025 |
| C,0,-3.1285316156,1.8773583927,-0.4325636405                                       | 1476.729  | 1486.4697 | 1488.9785 |
| H,0,-4.1926536146,1.9441925422,-0.2158377856                                       | 1493.565  | 1496.0382 | 1499.9332 |
| H,0,-2.5908213674,2.5324031301,0.2567768225                                        | 1508.4204 | 1744.9052 | 3036.8661 |
| H,0,-2.9500840122,2.2686048413,-1.4363554191                                       | 3046.619  | 3052.6125 | 3055.2357 |
| C,0,-3.4441068024,-0.5493106609,-0.0829949925                                      | 3063.7348 | 3073.3507 | 3080.9648 |
| H,0,-3.0980149705,-1.5711628979,-0.002961721                                       | 3089.7295 | 3093.9056 | 3099.9635 |
| H,0,-4.5048358168,-0.386145485,0.0550370588                                        | 3126.0086 | 3134.0732 | 3135.8492 |
| O,0,2.3528976008,1.5835442766,-0.7536599122                                        | 3140.6198 | 3154.9352 | 3233.322  |
| O,0,1.3190441782,1.8514673277,0.1757724495                                         |           |           |           |
| O,0,1.9239672641,0.3845722923,-1.341648617                                         |           |           |           |
| UM06-2X/6-311++G(2df,2p): E = -615.8787048 Hartree                                 |           |           |           |
| RHF-UCCSD(T)-F12a/cc-pVDZ-F12 // M06-2X/6-311++G(2df,2p): E = -615.1587739 Hartree |           |           |           |
| PRC3                                                                               |           |           |           |
| 0,1                                                                                |           |           |           |
| C,0,0.0071725857,1.3310796338,-0.0065362114                                        | 39.4583   | 55.2977   | 62.9337   |
| C,0,-1.4678998411,1.2047079603,-0.3763096959                                       | 83.3371   | 102.5923  | 111.3052  |
| C,0,-2.0814591087,-0.1010108597,0.0592356766                                       | 133.063   | 170.2462  | 182.0195  |
| C,0,-1.3273923168,-1.1430339592,0.4162287571                                       | 201.9976  | 223.6897  | 261.7763  |
| C,0,0.1723897789,-1.1153898879,0.4655242098                                        | 293.0638  | 322.7618  | 335.772   |
| C,0,0.7685389525,0.0522746865,-0.3366504794                                        | 357.8806  | 445.3681  | 449.6674  |
| H,0,-2.0378337233,2.0291850295,0.0595073927                                        | 497.8805  | 535.9125  | 558.9143  |
| H,0,-1.5939714766,1.2960594083,-1.4612862685                                       | 652.5908  | 726.3674  | 783.0626  |
| H,0,0.5986294786,-0.1732036613,-1.3980904656                                       | 794.8928  | 821.8099  | 834.5223  |
| H,0,0.0938343302,1.532680243,1.0649404411                                          | 914.147   | 936.4185  | 939.1489  |
| H,0,-1.8129644582,-2.072260762,0.693888084                                         | 954.0729  | 983.4506  | 1008.7845 |
| H,0,0.5614368414,-2.0663807732,0.0978764063                                        | 1022.1603 | 1045.0498 | 1051.8157 |
| H,0,0.5103838393,-1.0371172209,1.5087852837                                        | 1066.0225 | 1088.0165 | 1114.0661 |
| H,0,0.4492273879,2.1800629301,-0.5295171573                                        | 1150.4875 | 1172.1591 | 1193.9413 |
| C,0,-3.5769844108,-0.1657335713,0.0376103788                                       | 1227.1282 | 1273.604  | 1283.395  |
| H,0,-3.9615334393,0.1045437909,-0.9487935447                                       | 1318.6728 | 1331.9614 | 1338.9613 |
| H,0,-3.9404421154,-1.1586243607,0.2955323471                                       | 1346.9426 | 1362.7741 | 1374.5683 |
| H,0,-3.9911081794,0.5494696862,0.7521769114                                        | 1406.8527 | 1412.773  | 1417.993  |
| C,0,2.264382877,0.1335739934,-0.1333580444                                         | 1420.6262 | 1460.1311 | 1478.0618 |
| C,0,3.0439991843,-1.0779036313,-0.5687596385                                       | 1478.4947 | 1481.7494 | 1491.0415 |
| H,0,4.1145591436,-0.8851296072,-0.5466490465                                       | 1492.7165 | 1500.6167 | 1507.5901 |

|                                                                                    |                                        |
|------------------------------------------------------------------------------------|----------------------------------------|
| H <sub>0</sub> ,2.842262368,-1.930542059,0.0823951178                              | 1730.5329 1735.8978 2994.7744          |
| H <sub>0</sub> ,2.7646554378,-1.3763497667,-1.5815930324                           | 3009.6459 3018.3795 3034.5482          |
| C <sub>0</sub> ,2.8742799586,1.1854719694,0.4015290056                             | 3047.3953 3048.1454 3068.9668          |
| H <sub>0</sub> ,2.3367065838,2.0627790234,0.7325827595                             | 3075.9711 3091.0984 3096.7577          |
| H <sub>0</sub> ,3.9493149947,1.197119398,0.5275472463                              | 3105.8708 3127.8248 3135.5652          |
| O <sub>0</sub> , -1.4638731352,0.0021205348,3.2276902173                           | 3156.6121 3171.5011 3242.333 3209.2166 |
| O <sub>0</sub> , -2.0702322735,-1.0684476428,3.1398958048                          | 3218.8043 3864.8131                    |
| O <sub>0</sub> , -1.9503627041,0.9789694855,2.6481740645                           |                                        |
| UM06-2X/6-311++G(2df,2p): E = -615.7763309 Hartree                                 |                                        |
| RHF-UCCSD(T)-F12a/cc-pVDZ-F12 // M06-2X/6-311++G(2df,2p): E = -615.0743409 Hartree |                                        |
| TS3                                                                                |                                        |
| 0,1                                                                                |                                        |
| C <sub>0</sub> , -0.5525389184,-0.6617527761,1.3875815423                          | -318.025 41.9711 65.351                |
| C <sub>0</sub> ,0.7587344046,-1.408039695,1.1775943288                             | 102.3472 140.1665 159.5125             |
| C <sub>0</sub> ,1.5474854438,-0.9028888425,-0.004392968                            | 164.1031 182.2545 193.0057             |
| C <sub>0</sub> ,0.9345984965,-0.2308768136,-1.0282376058                           | 205.4782 243.0319 288.2029             |
| C <sub>0</sub> , -0.4782850087,0.2599892126,-0.9272367166                          | 325.3402 353.8368 368.8058             |
| C <sub>0</sub> , -1.325196563,-0.5410365729,0.0790127946                           | 446.4003 466.3198 493.1738             |
| H <sub>0</sub> ,1.3775314247,-1.3614178079,2.0746775598                            | 522.5424 534.877 564.663               |
| H <sub>0</sub> ,0.5571952492,-2.4713881362,0.9999722512                            | 642.3672 725.7052 772.3211             |
| H <sub>0</sub> , -1.4541031738,-1.5512843572,-0.3318355681                         | 797.8521 826.7827 859.6245             |
| H <sub>0</sub> , -0.3389407825,0.3376608439,1.7756192956                           | 905.1029 920.4246 948.0899             |
| H <sub>0</sub> ,1.4270567821,-0.1806980519,-1.9900875848                           | 952.4137 984.0064 1009.8045            |
| H <sub>0</sub> , -0.9347324478,0.2572481668,-1.9165636555                          | 1018.5211 1028.135 1054.4461           |
| H <sub>0</sub> , -0.4679290496,1.3077352407,-0.5946623625                          | 1067.1091 1093.2801 1112.3136          |
| H <sub>0</sub> , -1.155225587,-1.1786680272,2.1352683329                           | 1141.4469 1160.4631 1192.8786          |
| C <sub>0</sub> ,2.9302811524,-1.4452010678,-0.1695495398                           | 1218.0453 1234.2341 1271.7815          |
| H <sub>0</sub> ,2.8949550644,-2.5237134164,-0.3435346615                           | 1277.4947 1290.5565 1326.552           |
| H <sub>0</sub> ,3.4441659824,-0.9684486004,-1.0017009968                           | 1337.7008 1345.7088 1359.9403          |
| H <sub>0</sub> ,3.5108761879,-1.276172437,0.7376206543                             | 1402.699 1413.5069 1417.4879           |
| C <sub>0</sub> , -2.7059480289,0.0607232857,0.2109776584                           | 1423.2502 1452.4255 1476.9908          |
| C <sub>0</sub> , -3.5425646068,0.0458259623,-1.0397958202                          | 1478.6815 1486.5309 1490.948           |
| H <sub>0</sub> , -4.5685064128,0.3408402409,-0.8297694876                          | 1495.4433 1500.3061 1507.7764          |
| H <sub>0</sub> , -3.1438572588,0.7309416109,-1.7902703406                          | 1611.219 1732.1279 2996.2053           |
| H <sub>0</sub> , -3.5520120515,-0.9496913314,-1.488941448                          | 3015.0418 3021.9468 3042.2066          |
| C <sub>0</sub> , -3.1687015332,0.5812387246,1.3416347421                           | 3052.4118 3053.6248 3092.7004          |
| H <sub>0</sub> , -2.5827563913,0.6118714649,2.2491455283                           | 3096.386 3101.069 3107.7171            |
| H <sub>0</sub> , -4.1647325387,1.0019768163,1.3899084122                           | 3115.5815 3133.5056 3152.9629          |
| O <sub>0</sub> ,1.7534570218,1.8495061081,0.3829661612                             | 3153.0287 3187.7986 3234.8012          |
| O <sub>0</sub> ,2.0859367977,1.6925051144,-0.8234184931                            |                                        |
| O <sub>0</sub> ,2.2139806053,0.9385517612,1.1325490073                             |                                        |
| UM06-2X/6-311++G(2df,2p): E = -615.7696933 Hartree                                 |                                        |
| RHF-UCCSD(T)-F12a/cc-pVDZ-F12 // M06-2X/6-311++G(2df,2p): E = -615.069057 Hartree  |                                        |
| POZ3                                                                               |                                        |
| 0,1                                                                                |                                        |
| C <sub>0</sub> ,0.4167374273,-0.9664609804,-0.9639022774                           | 29.9471 72.9858 73.7414                |
| C <sub>0</sub> , -0.9296254062,-1.4939577199,-0.4873055719                         | 169.1528 189.0897 218.7154             |
| C <sub>0</sub> , -1.8651017008,-0.4074962422,0.0300781921                          | 226.9297 245.6741 266.6742             |
| C <sub>0</sub> , -1.1834072417,0.6597299926,0.8983391792                           | 305.834 343.0591 368.8232              |
| C <sub>0</sub> ,0.2289758181,1.0437000603,0.4785222572                             | 389.1131 443.4679 460.442              |
| C <sub>0</sub> ,1.1038587381,-0.1737985098,0.144151858                             | 469.4141 516.2295 560.0648             |
| H <sub>0</sub> , -1.4461442504,-2.0319667969,-1.2841730278                         | 610.9872 627.6821 724.8471             |
| H <sub>0</sub> , -0.7758680736,-2.2099471857,0.3245829034                          | 751.7033 776.9699 837.1055             |
| H <sub>0</sub> ,1.1557047168,-0.8140718393,1.0365123558                            | 888.1388 899.8014 917.2244             |
| H <sub>0</sub> ,0.2682994087,-0.3216750673,-1.8336301963                           | 926.2142 948.3662 954.6967             |
| H <sub>0</sub> , -1.2464724357,0.3961141097,1.9545202269                           | 966.9721 986.3356 1014.1108            |
| H <sub>0</sub> ,0.6681964055,1.6486434444,1.270791282                              | 1022.9245 1038.106 1053.8905           |

|                                                                                    |           |           |           |
|------------------------------------------------------------------------------------|-----------|-----------|-----------|
| H,0,0.1607493567,1.6689446634,-0.4136071133                                        | 1064.0984 | 1081.7263 | 1108.5039 |
| H,0,1.0449693729,-1.8004160312,-1.2790984857                                       | 1125.9159 | 1164.7947 | 1181.3835 |
| C,0,-3.0841683186,-0.995943062,0.7264147415                                        | 1200.1737 | 1240.8239 | 1264.2514 |
| H,0,-2.7844601687,-1.6148122041,1.5727706245                                       | 1278.6699 | 1298.6615 | 1308.3235 |
| H,0,-3.7372352217,-0.1997276819,1.0791728902                                       | 1343.1132 | 1353.051  | 1360.9725 |
| H,0,-3.6411715207,-1.6162170039,0.0248296505                                       | 1378.322  | 1404.5997 | 1411.5575 |
| C,0,2.5201872662,0.258065076,-0.1652842583                                         | 1414.0061 | 1420.9851 | 1458.2352 |
| C,0,3.3005835112,0.8104592522,0.9965257478                                         | 1482.7315 | 1487.4631 | 1492.5958 |
| H,0,4.3362824351,0.9963079839,0.7200498801                                         | 1496.6942 | 1501.5822 | 1504.5358 |
| H,0,2.8746935909,1.749768447,1.352818349                                           | 1507.3921 | 1738.1147 | 2989.9368 |
| H,0,3.2867116792,0.113381976,1.8373632592                                          | 3046.7884 | 3047.4432 | 3051.6406 |
| C,0,3.0594766467,0.1677526383,-1.3753928546                                        | 3055.9824 | 3067.0189 | 3098.0064 |
| H,0,2.5198937959,-0.2252209986,-2.2254620245                                       | 3101.9991 | 3107.6549 | 3110.9023 |
| H,0,4.0760222446,0.4943665045,-1.5527727504                                        | 3122.4844 | 3130.547  | 3141.0098 |
| O,0,-2.2446810909,1.7596792266,-0.6834681601                                       | 3148.4867 | 3156.1701 | 3236.8119 |
| O,0,-2.0879588338,1.7373895199,0.7129781502                                        |           |           |           |
| O,0,-2.3072659911,0.3776214383,-1.0843931874                                       |           |           |           |
| UM06-2X/6-311++G(2df,2p): E = -615.879111 Hartree                                  |           |           |           |
| RHF-UCCSD(T)-F12a/cc-pVDZ-F12 // M06-2X/6-311++G(2df,2p): E = -615.1590818 Hartree |           |           |           |
| PRC4                                                                               |           |           |           |
| 0,1                                                                                |           |           |           |
| C,0,-0.0095690493,1.3158385009,0.0445483739                                        | 40.6355   | 51.9496   | 61.2808   |
| C,0,-1.4777725351,1.1930608275,-0.3515451789                                       | 83.8971   | 104.2879  | 114.8428  |
| C,0,-2.0899792853,-0.1196388927,0.0665669227                                       | 131.1594  | 180.0138  | 192.8487  |
| C,0,-1.3355754664,-1.1599916237,0.4250676208                                       | 206.5493  | 224.0246  | 260.8126  |
| C,0,0.1638152729,-1.1364275248,0.4737788635                                        | 288.3275  | 319.8526  | 334.93    |
| C,0,0.7582921837,0.0464486589,-0.3076501051                                        | 358.3978  | 445.4115  | 457.583   |
| H,0,-2.0544684146,2.0135581098,0.0824998372                                        | 494.5327  | 533.7957  | 558.4249  |
| H,0,-1.5859255362,1.293472536,-1.4377395797                                        | 653.6725  | 724.129   | 783.0539  |
| H,0,0.5932724909,-0.1595784123,-1.3739244363                                       | 797.6681  | 822.045   | 841.1724  |
| H,0,0.0598405447,1.4844084233,1.1223210275                                         | 913.5605  | 936.685   | 943.0128  |
| H,0,-1.8212269846,-2.0925859233,0.6938861214                                       | 950.0556  | 983.2189  | 1006.7772 |
| H,0,0.5502946148,-2.0801112359,0.08486481                                          | 1019.6435 | 1043.5372 | 1052.3474 |
| H,0,0.4912860898,-1.0767499552,1.5189335984                                        | 1065.0953 | 1087.6397 | 1114.5293 |
| H,0,0.4370626912,2.178970816,-0.4506146033                                         | 1148.6594 | 1174.6538 | 1190.4064 |
| C,0,-3.5862374639,-0.1944424197,0.0426316475                                       | 1226.3546 | 1271.9879 | 1282.0222 |
| H,0,-3.9731378237,0.0814195017,-0.9410845211                                       | 1320.3364 | 1332.5263 | 1338.2478 |
| H,0,-3.9445120069,-1.19317146,0.2880155787                                         | 1348.1287 | 1363.2903 | 1372.3698 |
| H,0,-4.0172258841,0.5155343688,0.755217397                                         | 1407.3363 | 1412.1742 | 1418.0238 |
| C,0,2.2530091365,0.1303861131,-0.0998103788                                        | 1419.9106 | 1455.2815 | 1475.5218 |
| C,0,3.0398729247,-1.0614579946,-0.5738900987                                       | 1482.7287 | 1486.2875 | 1491.032  |
| H,0,4.109735837,-0.8672759125,-0.5349574768                                        | 1498.2275 | 1499.5543 | 1504.5415 |
| H,0,2.8338886804,-1.9391413616,0.0417211468                                        | 1734.844  | 1738.283  | 2999.1746 |
| H,0,2.7698774559,-1.3206931535,-1.6000654662                                       | 3017.6089 | 3021.048  | 3029.6043 |
| C,0,2.8558749215,1.168073368,0.4693925183                                          | 3047.7594 | 3054.9417 | 3070.8631 |
| H,0,2.3120275142,2.030150791,0.8288676927                                          | 3072.3507 | 3080.9563 | 3103.9058 |
| H,0,3.930656749,1.1820450911,0.5973924766                                          | 3106.7716 | 3127.5532 | 3135.1558 |
| O,0,-2.6717166534,-0.0383096059,3.0737299392                                       | 3155.438  | 3167.4175 | 3235.463  |
| O,0,-1.9587671618,0.9004942158,2.7059956306                                        |           |           |           |
| O,0,-2.1445241621,-1.1495350563,3.1653425922                                       |           |           |           |
| UM06-2X/6-311++G(2df,2p): E = -615.7759304 Hartree                                 |           |           |           |
| RHF-UCCSD(T)-F12a/cc-pVDZ-F12 // M06-2X/6-311++G(2df,2p): E = -615.0741245 Hartree |           |           |           |
| TS4                                                                                |           |           |           |
| 0,1                                                                                |           |           |           |
| C,0,-0.3831024243,-0.0690545329,1.2783488446                                       | -299.8693 | 39.6473   | 60.2782   |
| C,0,0.844143031,-0.9725467956,1.2986689261                                         | 74.7457   | 138.617   | 142.7635  |
| C,0,1.5134228029,-1.0689103099,-0.0459329323                                       | 160.5258  | 183.6091  | 198.8007  |

|                                                                                    |           |           |           |
|------------------------------------------------------------------------------------|-----------|-----------|-----------|
| C,0,0.8321760363,-0.7622152289,-1.1919863879                                       | 200.3     | 240.5398  | 274.8183  |
| C,0,-0.5682397784,-0.2263986571,-1.2052006878                                      | 316.0147  | 344.9325  | 365.2451  |
| C,0,-1.3094412453,-0.4413335294,0.1264640339                                       | 437.2312  | 453.7513  | 491.8274  |
| H,0,1.5677068919,-0.6216586591,2.0364080632                                        | 514.4717  | 529.1094  | 557.8213  |
| H,0,0.560257197,-1.9858777813,1.6064598383                                         | 648.2395  | 725.1094  | 774.6542  |
| H,0,-1.5334905033,-1.5135118093,0.208388136                                        | 796.9308  | 820.6938  | 862.9767  |
| H,0,-0.0608318033,0.9683597885,1.1613379219                                        | 911.8853  | 924.8315  | 949.1558  |
| H,0,1.2523786124,-1.0779909592,-2.1395294969                                       | 951.2156  | 981.9951  | 1010.4664 |
| H,0,-1.1156735698,-0.6868188309,-2.0287636904                                      | 1016.6147 | 1027.7221 | 1053.9413 |
| H,0,-0.5327787228,0.8485522736,-1.4167130303                                       | 1065.6158 | 1091.7953 | 1114.1711 |
| H,0,-0.9111349958,-0.1461496788,2.2293833333                                       | 1143.3107 | 1162.9048 | 1194.4021 |
| C,0,2.8220270648,-1.798921623,-0.1226621635                                        | 1220.9567 | 1231.6373 | 1273.7692 |
| H,0,2.6537857666,-2.878603472,-0.1324320444                                        | 1283.696  | 1286.912  | 1325.2142 |
| H,0,3.3610274782,-1.5388914119,-1.0345790755                                       | 1338.8184 | 1350.9863 | 1363.47   |
| H,0,3.4526653261,-1.5652527229,0.7336701124                                        | 1409.1852 | 1412.1759 | 1415.6166 |
| C,0,-2.6351488219,0.2850451751,0.1170613563                                        | 1420.2488 | 1455.0936 | 1473.9363 |
| C,0,-3.6103209735,-0.1614391498,-0.93828088                                        | 1481.5271 | 1489.4372 | 1490.0742 |
| H,0,-4.5888526622,0.2888687958,-0.7851718509                                       | 1496.8537 | 1498.7203 | 1504.0872 |
| H,0,-3.2649791806,0.1160194667,-1.9360748486                                       | 1622.4715 | 1734.0793 | 3002.5849 |
| H,0,-3.7218917225,-1.2479582758,-0.9297874932                                      | 3024.655  | 3029.3378 | 3044.1319 |
| C,0,-2.9376589994,1.2621265943,0.9639354856                                        | 3044.593  | 3050.2517 | 3082.2945 |
| H,0,-2.2481892546,1.6077465025,1.7208021361                                        | 3091.4375 | 3100.8934 | 3105.9076 |
| H,0,-3.8999464402,1.7554106067,0.9186722384                                        | 3110.419  | 3133.6925 | 3146.8469 |
| O,0,2.8457762497,1.1128807507,-0.9501364607                                        | 3153.0198 | 3191.6794 | 3234.0675 |
| O,0,2.4597801955,0.9591915295,0.2412859388                                         |           |           |           |
| O,0,1.8915268855,1.1822178143,-1.7687373025                                        |           |           |           |
| UM06-2X/6-311++G(2df,2p): E = -615.7701897 Hartree                                 |           |           |           |
| RHF-UCCSD(T)-F12a/cc-pVDZ-F12 // M06-2X/6-311++G(2df,2p): E = -615.0698216 Hartree |           |           |           |
| POZ4                                                                               |           |           |           |
| 0,1                                                                                |           |           |           |
| C,0,0.6113370098,0.9695065667,1.1867536841                                         | 46.5799   | 927.8448  | 1415.1504 |
| C,0,-0.7205921956,1.4872223568,0.6555026319                                        | 67.8604   | 948.736   | 1421.5676 |
| C,0,-1.6262060292,0.4127783389,0.0726881823                                        | 130.0562  | 954.6569  | 1459.5223 |
| C,0,-0.9059344085,-0.6458440761,-0.7719742552                                      | 166.3277  | 976.46    | 1480.3348 |
| C,0,0.4578382224,-1.0558453907,-0.230104222                                        | 172.3472  | 988.7365  | 1487.4084 |
| C,0,1.3363319909,0.1536263209,0.1200380215                                         | 180.796   | 1013.8719 | 1490.1035 |
| H,0,-1.2784680811,2.0098025098,1.4346980505                                        | 207.9676  | 1020.3792 | 1493.1386 |
| H,0,-0.5374516015,2.214742333,-0.1392797621                                        | 233.5076  | 1043.2608 | 1500.9462 |
| H,0,1.4285874137,0.7788187188,-0.780105821                                         | 277.1965  | 1056.1264 | 1505.4114 |
| H,0,0.4380752109,0.3434884955,2.0647613328                                         | 289.8413  | 1066.2036 | 1507.3645 |
| H,0,-0.8556947377,-0.3410008737,-1.8195812214                                      | 346.1747  | 1090.7702 | 1742.5303 |
| H,0,0.9354186296,-1.7063482755,-0.9619180202                                       | 357.4549  | 1108.8305 | 2990.7607 |
| H,0,0.3004864681,-1.6455636,0.6754127941                                           | 391.6278  | 1123.1957 | 3048.5047 |
| H,0,1.2260830006,1.8133870272,1.5026856451                                         | 427.2117  | 1163.2082 | 3050.5465 |
| C,0,-2.8242808769,1.0057804546,-0.6511743352                                       | 466.8108  | 1183.9152 | 3055.63   |
| H,0,-2.4917237876,1.6027601738,-1.4999977736                                       | 475.3722  | 1196.487  | 3059.1257 |
| H,0,-3.4839533535,0.2192901611,-1.0115022721                                       | 515.3463  | 1249.9294 | 3075.2478 |
| H,0,-3.3814315651,1.649177836,0.0290913825                                         | 563.7289  | 1269.1405 | 3088.3527 |
| C,0,2.7352334201,-0.2825701115,0.4937645711                                        | 615.2378  | 1273.9537 | 3101.2256 |
| C,0,3.5640710478,-0.8395432668,-0.6316021908                                       | 626.8918  | 1299.9703 | 3107.9426 |
| H,0,4.5783877784,-1.0551002522,-0.3025469705                                       | 727.6505  | 1305.8049 | 3109.4765 |
| H,0,3.1353720038,-1.7618694786,-1.0267179737                                       | 748.4407  | 1342.8575 | 3130.4678 |
| H,0,3.6131884587,-0.1297469758,-1.4604277547                                       | 783.472   | 1353.6632 | 3131.7005 |
| C,0,3.2221091561,-0.1878368873,1.7255325084                                        | 829.6357  | 1363.8169 | 3140.4965 |
| H,0,2.6488129526,0.2150301852,2.5486093861                                         | 881.8386  | 1377.5669 | 3144.1509 |
| H,0,4.2283526683,-0.5180333547,1.948733804                                         | 893.0446  | 1406.966  | 3159.0706 |
| O,0,-2.6011095852,-1.5446594828,0.4881882088                                       | 914.8151  | 1410.2228 | 3240.4538 |

|                                                                                                                                                                                                                                                                                                                                                                                                                                                                                                                                                                                                                                                                                                                                                                                                                                                                                                                                                                                                                                                                                                                                                                                                                                                                                                                                                                                                                                     |                                                                                                                                                                                                                                                                                                                                                                                                                                                                                                                                                                                                                                                                                                                                                                                                                                                                           |
|-------------------------------------------------------------------------------------------------------------------------------------------------------------------------------------------------------------------------------------------------------------------------------------------------------------------------------------------------------------------------------------------------------------------------------------------------------------------------------------------------------------------------------------------------------------------------------------------------------------------------------------------------------------------------------------------------------------------------------------------------------------------------------------------------------------------------------------------------------------------------------------------------------------------------------------------------------------------------------------------------------------------------------------------------------------------------------------------------------------------------------------------------------------------------------------------------------------------------------------------------------------------------------------------------------------------------------------------------------------------------------------------------------------------------------------|---------------------------------------------------------------------------------------------------------------------------------------------------------------------------------------------------------------------------------------------------------------------------------------------------------------------------------------------------------------------------------------------------------------------------------------------------------------------------------------------------------------------------------------------------------------------------------------------------------------------------------------------------------------------------------------------------------------------------------------------------------------------------------------------------------------------------------------------------------------------------|
| O,0,-2.0493666959,-0.4303271332,1.141952903<br>O,0,-1.8073852742,-1.7395323494,-0.7100889136                                                                                                                                                                                                                                                                                                                                                                                                                                                                                                                                                                                                                                                                                                                                                                                                                                                                                                                                                                                                                                                                                                                                                                                                                                                                                                                                        |                                                                                                                                                                                                                                                                                                                                                                                                                                                                                                                                                                                                                                                                                                                                                                                                                                                                           |
| UM06-2X/6-311++G(2df,2p): E = -615.8792726 Hartree<br>RHF-UCCSD(T)-F12a/cc-pVDZ-F12 // M06-2X/6-311++G(2df,2p): E = -615.1590783 Hartree                                                                                                                                                                                                                                                                                                                                                                                                                                                                                                                                                                                                                                                                                                                                                                                                                                                                                                                                                                                                                                                                                                                                                                                                                                                                                            |                                                                                                                                                                                                                                                                                                                                                                                                                                                                                                                                                                                                                                                                                                                                                                                                                                                                           |
| TS-POZ1-Syn-2a<br>0,1<br>C,0,0.5747308099,1.9430319689,-0.3559764283<br>C,0,-0.8305389669,2.2670045318,0.146562266<br>C,0,-1.8092155638,1.0836757571,0.0657265812<br>C,0,-1.0988850652,0.0527612519,1.4291836852<br>C,0,0.4122715423,0.0816500821,1.3272149535<br>C,0,1.0124762132,0.5142795185,-0.0188197449<br>H,0,-0.8006590367,2.6232832653,1.1792803679<br>H,0,-1.2683828274,3.0768516666,-0.4409328378<br>H,0,0.5875169767,-0.155566957,-0.7665673413<br>H,0,1.2623633735,2.6590679518,0.096292265<br>H,0,-1.5318658095,0.4146254228,2.3577322014<br>H,0,0.7256484701,-0.9383568046,1.5618932681<br>H,0,0.7892349434,0.7341153453,2.1183645103<br>H,0,0.6298197987,2.0806022958,-1.4354687937<br>C,0,-3.229153256,1.4029827553,0.5210636927<br>H,0,-3.7093789571,2.0134250508,-0.2443252192<br>H,0,-3.799513518,0.4827900164,0.6295108466<br>H,0,-3.2448034725,1.9576249436,1.4595025564<br>C,0,2.5088440189,0.2865210488,-0.0541804687<br>C,0,2.959024464,-1.111854421,0.2818243601<br>H,0,3.9891831254,-1.2750593623,-0.0270944191<br>H,0,2.8998302921,-1.3018231633,1.3554579339<br>H,0,2.3241179469,-1.851774786,-0.2104037732<br>C,0,3.3913678854,1.2106557845,-0.4175166219<br>H,0,3.1106712233,2.2191848389,-0.6830826162<br>H,0,4.4449671623,0.970395638,-0.4763311049<br>O,0,-1.3194968148,-1.4509632172,-0.1009607652<br>O,0,-1.730301425,-1.0653416813,1.0705404587<br>O,0,-1.700836933,0.3053531585,-0.9446724528 | -545.365 52.6422 96.7759<br>121.0173 175.86 187.7487<br>190.3891 214.2066 241.243<br>281.6173 293.0668 327.7821<br>340.8919 371.71 439.5125<br>445.3975 458.6776 500.8211<br>549.2757 581.9176 596.3336<br>626.1208 723.1163 750.0378<br>787.2456 822.5181 887.0962<br>917.0185 918.9764 954.0217<br>964.4122 991.0324 1003.0612<br>1009.0829 1022.264 1052.6499<br>1066.3883 1086.025 1114.9091<br>1139.065 1160.7094 1193.0094<br>1208.2743 1252.1932 1261.563<br>1290.0778 1297.2819 1316.9986<br>1345.9074 1353.9121 1380.7518<br>1399.1121 1409.9563 1415.5007<br>1432.3286 1456.2535 1458.9545<br>1469.96 1483.9243 1491.1038<br>1493.1353 1501.1763 1505.9822<br>1515.2326 1731.4789 3045.2677<br>3046.1779 3048.5652 3051.8738<br>3073.872 3086.0944 3093.0527<br>3103.3708 3107.8308 3119.4133<br>3124.9797 3141.8013 3148.9453<br>3158.6887 3161.1555 3242.8929 |
| UM06-2X/6-311++G(2df,2p): E = -615.8372997 Hartree<br>RHF-UCCSD(T)-F12a/cc-pVDZ-F12 // M06-2X/6-311++G(2df,2p): E = -615.1309965 Hartree                                                                                                                                                                                                                                                                                                                                                                                                                                                                                                                                                                                                                                                                                                                                                                                                                                                                                                                                                                                                                                                                                                                                                                                                                                                                                            |                                                                                                                                                                                                                                                                                                                                                                                                                                                                                                                                                                                                                                                                                                                                                                                                                                                                           |
| TS-POZ1-Syn-2b<br>0,1<br>C,0,0.7331736548,1.1335611447,-0.626434181<br>C,0,-0.7383567288,0.8665983405,-0.9165517733<br>C,0,-1.5591940682,0.4905719266,0.2956903732<br>C,0,-0.7083043895,-1.0184975253,1.0308221477<br>C,0,0.7515550143,-0.56604855,1.1801623278<br>C,0,1.4219315963,-0.128458836,-0.1227569778<br>H,0,-1.2097381638,1.7624881884,-1.3336524758<br>H,0,-0.8307170484,0.0693277154,-1.649089175<br>H,0,1.2508376504,-0.9258158322,-0.8548559923<br>H,0,0.837938093,1.9339480265,0.1114897028<br>H,0,-1.2343342193,-1.0639710719,1.998390715<br>H,0,1.2721281575,-1.4153332371,1.6240528186<br>H,0,0.8056659674,0.2481206234,1.9074144371<br>H,0,1.2141548919,1.4827289923,-1.5406402435<br>C,0,-1.7807449489,1.5252229994,1.3594391545<br>H,0,-0.844174061,1.7525061717,1.8643802015<br>H,0,-2.1558604664,2.449475348,0.9175587976<br>H,0,-2.4984221288,1.1639642121,2.0930747314                                                                                                                                                                                                                                                                                                                                                                                                                                                                                                                                     | - 561.2609 37.6861 65.2483<br>140.1868 160.8543 175.1782<br>194.1228 218.5476 227.7874<br>258.828 322.4745 338.8472<br>369.453 379.0227 420.32<br>450.9309 496.1442 510.8751<br>538.8419 565.8175 579.2018<br>655.9943 688.5616 726.9394<br>762.7306 816.0874 890.4936<br>904.8479 935.0845 950.7249<br>957.7006 992.7553 1006.6649<br>1015.2748 1021.3546 1064.7161<br>1072.0529 1076.6414 1126.313<br>1139.8055 1190.3176 1212.8156<br>1227.7823 1263.7847 1286.0916<br>1294.4157 1309.5816 1332.8688<br>1351.324 1362.5585 1379.2786<br>1400.9491 1415.8716 1424.3787                                                                                                                                                                                                                                                                                                  |



|                                                                                    |            |           |           |
|------------------------------------------------------------------------------------|------------|-----------|-----------|
| C,0,2.9167599607,0.0053484727,0.066942617                                          | 1426.6361  | 1457.9525 | 1474.3297 |
| C,0,3.6729788038,-1.2916806717,0.1520842406                                        | 1481.1837  | 1489.0897 | 1491.8119 |
| H,0,4.732812108,-1.1205890844,0.3280449093                                         | 1499.4554  | 1503.9164 | 1504.3644 |
| H,0,3.2926011934,-1.9302115411,0.9505919629                                        | 1514.536   | 1735.6237 | 2982.3259 |
| H,0,3.5618964342,-1.8521527118,-0.7785060739                                       | 3038.6136  | 3041.6919 | 3045.1991 |
| C,0,3.5419148363,1.175237204,0.1400684865                                          | 3053.1578  | 3058.6927 | 3065.9957 |
| H,0,3.0236722343,2.1198679137,0.0516468955                                         | 3094.866   | 3099.2649 | 3103.7388 |
| H,0,4.6133493653,1.2219926517,0.2844611412                                         | 3136.6619  | 3142.6491 | 3151.1491 |
| O,0,-2.5086121842,-1.1470715013,-0.806461113                                       | 3157.1485  | 3161.6028 | 3237.1383 |
| O,0,-0.9765540954,-1.9310634817,0.1880415506                                       |            |           |           |
| O,0,-2.6880415086,-0.1910658169,0.0533414548                                       |            |           |           |
| UM06-2X/6-311++G(2df,2p): E = -615.8438707 Hartree                                 |            |           |           |
| RHF-UCCSD(T)-F12a/cc-pVDZ-F12 // M06-2X/6-311++G(2df,2p): E = -615.1374944 Hartree |            |           |           |
| TS-POZ2-Anti-2a                                                                    |            |           |           |
| 0,1                                                                                |            |           |           |
| C,0,0.411254369,0.9701184524,-1.3942465274                                         | - 572.897  | 54.2435   | 86.3458   |
| C,0,-0.524353785,1.7844817777,-0.5112319189                                        | 116.775    | 153.7086  | 194.2151  |
| C,0,-1.7943782359,1.0052302725,-0.1092234958                                       | 219.389    | 237.2946  | 253.7123  |
| C,0,-1.0682987309,-0.7326367697,0.2610774491                                       | 286.6497   | 324.4978  | 358.6992  |
| C,0,0.3834584659,-0.621270188,0.5895658476                                         | 387.0079   | 397.6872  | 429.0759  |
| C,0,1.2146481908,-0.0711279709,-0.5981542569                                       | 442.2909   | 471.1804  | 515.0713  |
| H,0,-0.0100113979,2.1208887632,0.3920376231                                        | 539.9431   | 580.4925  | 591.8704  |
| H,0,-0.8684232065,2.6762631524,-1.0367551743                                       | 622.2321   | 713.3235  | 729.8469  |
| H,0,1.4239785741,-0.9145732228,-1.2622510066                                       | 764.2758   | 787.7657  | 887.0371  |
| H,0,1.0958699921,1.6169685913,-1.9394254622                                        | 914.3827   | 938.5161  | 948.2559  |
| H,0,-1.7899560746,-0.975487761,1.0349036702                                        | 959.2172   | 970.7117  | 992.9406  |
| H,0,0.7640325387,-1.5896403922,0.9200140314                                        | 1000.8272  | 1028.5521 | 1043.7437 |
| H,0,0.4676305254,0.0524431412,1.4458882136                                         | 1067.9592  | 1081.0809 | 1110.5343 |
| H,0,-0.1987615272,0.4667905882,-2.1453689163                                       | 1146.3738  | 1170.4871 | 1180.108  |
| C,0,-2.3852258107,1.3843387964,1.2451272291                                        | 1214.7962  | 1225.9231 | 1255.8937 |
| H,0,-2.6502713226,2.4425601726,1.230147916                                         | 1275.7206  | 1296.9379 | 1334.337  |
| H,0,-3.2885461605,0.8038734001,1.422914802                                         | 1341.8448  | 1360.6897 | 1383.2754 |
| H,0,-1.6780384599,1.2273708675,2.0615983916                                        | 1389.359   | 1396.5801 | 1416.6744 |
| C,0,2.5488879309,0.4097178886,-0.0621350013                                        | 1433.8425  | 1449.7403 | 1470.4051 |
| C,0,3.4299413322,-0.6681223077,0.5101265748                                        | 1480.4369  | 1491.3408 | 1491.894  |
| H,0,4.4085416284,-0.2759090684,0.7777989882                                        | 1497.5125  | 1499.4034 | 1514.6903 |
| H,0,2.9888933858,-1.1091832557,1.4063739001                                        | 1522.3465  | 1734.0305 | 3040.5718 |
| H,0,3.5641778315,-1.4780247145,-0.2102062502                                       | 3044.2947  | 3047.9262 | 3053.2964 |
| C,0,2.9317430137,1.6810872474,-0.0591685621                                        | 3071.2646  | 3079.9459 | 3100.1243 |
| H,0,2.3173837506,2.4766783424,-0.4565128925                                        | 3101.4332  | 3111.4524 | 3116.1149 |
| H,0,3.8915274477,1.9671223736,0.350710662                                          | 3120.5759  | 3142.5766 | 3144.4905 |
| O,0,-2.5852440235,-1.2138048074,-1.2056549161                                      | 3152.6453  | 3157.1458 | 3236.6001 |
| O,0,-1.3200620709,-1.2913406615,-0.9079049675                                      |            |           |           |
| O,0,-2.6209600906,0.7447607776,-1.0407338306                                       |            |           |           |
| UM06-2X/6-311++G(2df,2p): E = -615.8380838 Hartree                                 |            |           |           |
| RHF-UCCSD(T)-F12a/cc-pVDZ-F12 // M06-2X/6-311++G(2df,2p): E = -615.1306217 Hartree |            |           |           |
| TS-POZ2-Anti-2b                                                                    |            |           |           |
| 0,1                                                                                |            |           |           |
| C,0,0.7811064327,1.3958241352,-0.5173126103                                        | - 567.7857 | 38.0019   | 80.7398   |
| C,0,-0.6357754093,1.7336488555,-0.0265498145                                       | 116.7381   | 167.8105  | 176.5646  |
| C,0,-1.5375391074,0.5354651987,0.0362155263                                        | 196.2412   | 213.4594  | 251.3108  |
| C,0,-0.7911636116,-0.6524010048,1.3090424994                                       | 277.1706   | 294.1938  | 335.4351  |
| C,0,0.7004510979,-0.3075681484,1.3567464643                                        | 355.512    | 359.4711  | 424.9923  |
| C,0,1.2996969173,0.0372944405,-0.0133617984                                        | 447.5722   | 502.2287  | 510.0059  |
| H,0,-0.6019849802,2.1448171185,0.9843892169                                        | 539.506    | 571.1547  | 594.9565  |
| H,0,-1.0921365879,2.5053164831,-0.6519684464                                       | 659.4674   | 689.2649  | 727.041   |
| H,0,0.9469530792,-0.7377315765,-0.6980663101                                       | 774.6019   | 805.6586  | 878.7474  |

|                                                                                    |            |           |           |
|------------------------------------------------------------------------------------|------------|-----------|-----------|
| H,0,1.4387481759,2.1990701304,-0.1912657812                                        | 917.2213   | 927.6643  | 942.0254  |
| H,0,-1.3778978082,-0.2526324643,2.1504491497                                       | 960.3146   | 973.9609  | 1010.8542 |
| H,0,1.2114470772,-1.1722615443,1.7822089725                                        | 1021.6601  | 1027.4957 | 1039.8331 |
| H,0,0.8590137812,0.5269555007,2.0452662707                                         | 1071.5459  | 1086.592  | 1118.1705 |
| H,0,0.8060508289,1.397267345,-1.6068404164                                         | 1136.0824  | 1175.6016 | 1220.9352 |
| C,0,-2.9555150395,0.6954458673,0.5093330353                                        | 1239.2532  | 1257.1972 | 1276.1866 |
| H,0,-3.5464693088,1.118633872,-0.3063961283                                        | 1288.9033  | 1304.512  | 1333.8832 |
| H,0,-3.3839526394,-0.2616029584,0.7912496446                                       | 1359.6468  | 1371.3093 | 1377.4141 |
| H,0,-2.9842777289,1.3792902022,1.3548568963                                        | 1402.2363  | 1415.7028 | 1417.864  |
| C,0,2.8099038707,-0.08499388,0.0395946854                                          | 1424.7452  | 1458.5997 | 1471.7056 |
| C,0,3.3225098183,-1.4719904462,-0.2292719415                                       | 1480.4689  | 1485.3329 | 1489.5403 |
| H,0,4.3921037869,-1.5506315212,-0.0469583619                                       | 1495.6572  | 1500.2266 | 1503.2986 |
| H,0,2.8064092845,-2.2057729475,0.3936908483                                        | 1505.0902  | 1736.5487 | 2992.524  |
| H,0,3.1229217796,-1.7505685273,-1.2662635123                                       | 3047.0048  | 3053.2514 | 3056.3633 |
| C,0,3.6340193074,0.9117354567,0.3403618992                                         | 3058.425   | 3073.8544 | 3081.5188 |
| H,0,3.2930810387,1.9182410328,0.538473435                                          | 3093.9983  | 3103.1511 | 3104.8244 |
| H,0,4.7010900151,0.7442246036,0.4046906875                                         | 3128.9064  | 3139.4244 | 3140.7794 |
| O,0,-1.9721801178,-1.4069879151,-0.8670125842                                      | 3156.9234  | 3176.0136 | 3234.4928 |
| O,0,-1.1497176344,-1.7930645689,0.875391868                                        |            |           |           |
| O,0,-1.3461666479,-0.2738939891,-1.0063345441                                      |            |           |           |
| UM06-2X/6-311++G(2df,2p): E = -615.8398431 Hartree                                 |            |           |           |
| RHF-UCCSD(T)-F12a/cc-pVDZ-F12 // M06-2X/6-311++G(2df,2p): E = -615.1326875 Hartree |            |           |           |
| TS-POZ3-Syn-2a                                                                     |            |           |           |
| 0,1                                                                                |            |           |           |
| C,0,0.6694642851,1.7280509416,0.1866203257                                         | - 548.9919 | 26.3826   | 79.9783   |
| C,0,-0.7033816092,1.9573832119,-0.4155202884                                       | 128.6192   | 157.4999  | 183.561   |
| C,0,-1.7596732305,0.8834062433,-0.0702592865                                       | 193.8366   | 221.6175  | 248.7222  |
| C,0,-0.9284453253,-0.6290259937,-0.7385951936                                      | 267.4262   | 320.3456  | 331.2086  |
| C,0,0.444697467,-0.7201377475,-0.1282746612                                        | 349.0408   | 374.1564  | 435.3291  |
| C,0,1.3279478877,0.4973755149,-0.425816817                                         | 439.745    | 469.9325  | 514.8057  |
| H,0,-1.1273975886,2.8971878446,-0.0554887808                                       | 530.4531   | 573.7493  | 582.2177  |
| H,0,-0.6359475806,2.0390522789,-1.5036353262                                       | 588.4035   | 703.1039  | 747.5799  |
| H,0,1.3655764074,0.6396103007,-1.5147963651                                        | 788.7827   | 825.6256  | 879.7019  |
| H,0,0.5636023606,1.5943057106,1.2649199486                                         | 920.5527   | 939.4007  | 954.9578  |
| H,0,-0.9959993499,-0.5893052456,-1.8236809614                                      | 960.1821   | 990.7771  | 994.7327  |
| H,0,0.8915421693,-1.6375498859,-0.5220200662                                       | 1020.6727  | 1038.3569 | 1050.914  |
| H,0,0.3425140687,-0.8303238253,0.9486461336                                        | 1071.2737  | 1094.8723 | 1113.7284 |
| H,0,1.2963412496,2.6052375428,0.0198626424                                         | 1127.1875  | 1148.9564 | 1179.9674 |
| C,0,-3.0540085216,1.0414910256,-0.8611382945                                       | 1199.8279  | 1227.9699 | 1271.7863 |
| H,0,-2.8830525986,1.0627141437,-1.9377715623                                       | 1280.1238  | 1292.731  | 1306.2776 |
| H,0,-3.7367833437,0.2321920455,-0.6142456396                                       | 1343.0998  | 1349.8306 | 1365.3981 |
| H,0,-3.5226223743,1.9836662687,-0.5728265026                                       | 1396.368   | 1412.2037 | 1419.9969 |
| C,0,2.7468058794,0.2384734033,0.0330952498                                         | 1443.4311  | 1455.7487 | 1465.4732 |
| C,0,3.5464842152,-0.6963252962,-0.8317200083                                       | 1477.0235  | 1484.4189 | 1489.7751 |
| H,0,4.5428781854,-0.8541019747,-0.4246150934                                       | 1491.4337  | 1495.4936 | 1500.3421 |
| H,0,3.0627199301,-1.6697503281,-0.9289047751                                       | 1514.7105  | 1735.6545 | 2998.8407 |
| H,0,3.6467758616,-0.2887338497,-1.8402751892                                       | 3044.9474  | 3047.4656 | 3053.6085 |
| C,0,3.2697276443,0.7960612659,1.1183458978                                         | 3059.7177  | 3061.4057 | 3099.5076 |
| H,0,2.7157822616,1.4822393672,1.743121302                                          | 3100.5011  | 3112.3722 | 3118.4856 |
| H,0,4.2861928104,0.5758684496,1.4175443507                                         | 3143.9349  | 3149.0822 | 3150.8598 |
| O,0,-1.8698260745,-1.452239715,1.0351956932                                        | 3154.9764  | 3161.5233 | 3236.9618 |
| O,0,-1.8648058593,-1.4567762539,-0.2655981877                                      |            |           |           |
| O,0,-1.8837708773,0.5576556566,1.1573661353                                        |            |           |           |
| UM06-2X/6-311++G(2df,2p): E = -615.8406935 Hartree                                 |            |           |           |
| RHF-UCCSD(T)-F12a/cc-pVDZ-F12 // M06-2X/6-311++G(2df,2p): E = -615.1355669 Hartree |            |           |           |
| TS-POZ3-Syn-2b                                                                     |            |           |           |
| 0,1                                                                                |            |           |           |

|                                                                                    |           |           |           |
|------------------------------------------------------------------------------------|-----------|-----------|-----------|
| C,0,0.7678756187,1.5915336612,-0.4266293784                                        | -556.253  | 40.5476   | 94.8496   |
| C,0,-0.6788440533,1.8608004449,-0.8285612397                                       | 136.2783  | 180.8846  | 189.2277  |
| C,0,-1.7633717085,0.9584740586,-0.2589560214                                       | 204.2133  | 245.2887  | 265.3915  |
| C,0,-0.8686693107,-0.582044513,0.336447096                                         | 282.8     | 306.1186  | 321.8575  |
| C,0,0.1149986796,-0.8215610923,-0.8108496748                                       | 373.7897  | 385.5004  | 423.2434  |
| C,0,1.2496242297,0.2052052508,-0.9031208946                                        | 448.3884  | 492.8266  | 508.3796  |
| H,0,-0.9591151018,2.8706723166,-0.5126792318                                       | 546.2007  | 569.1898  | 599.8263  |
| H,0,-0.7693824855,1.8227139098,-1.9169287892                                       | 677.4024  | 716.0573  | 729.4312  |
| H,0,1.5032903539,0.2991368618,-1.9650786149                                        | 758.7203  | 786.5767  | 887.5825  |
| H,0,0.862712822,1.6595105552,0.6536744253                                          | 892.3572  | 939.5116  | 954.7075  |
| H,0,-1.727863296,-1.2703458746,0.3311701741                                        | 964.41    | 985.9437  | 1000.3477 |
| H,0,-0.4495102927,-0.8343113871,-1.7455734457                                      | 1014.1862 | 1029.7697 | 1041.3385 |
| H,0,0.5204478351,-1.8269925396,-0.6902907101                                       | 1061.3863 | 1081.9125 | 1128.8152 |
| H,0,1.3915359606,2.3675401219,-0.8708188414                                        | 1157.9595 | 1184.6072 | 1215.5174 |
| C,0,-2.894865124,0.5878551384,-1.1736057414                                        | 1247.6615 | 1257.649  | 1263.1732 |
| H,0,-2.5362858901,-0.084651996,-1.9512901984                                       | 1276.4654 | 1321.4178 | 1338.2599 |
| H,0,-3.6899420428,0.0964688612,-0.617312706                                        | 1351.296  | 1379.1154 | 1385.1124 |
| H,0,-3.2938801716,1.4789478112,-1.6604356915                                       | 1399.0771 | 1409.1844 | 1417.7896 |
| C,0,2.5300206416,-0.168944816,-0.1875504863                                        | 1422.2509 | 1455.572  | 1461.0288 |
| C,0,3.7348577544,0.6283707761,-0.6059914355                                        | 1477.4745 | 1486.4465 | 1488.6513 |
| H,0,4.6292353516,0.3003898057,-0.0806045503                                        | 1496.6888 | 1500.4825 | 1504.3973 |
| H,0,3.9091743352,0.5343805161,-1.6805631479                                        | 1517.2985 | 1741.2873 | 2998.3701 |
| H,0,3.591683859,1.6908792038,-0.3980297966                                         | 3014.2318 | 3039.0409 | 3048.3134 |
| C,0,2.6041718227,-1.0918610715,0.7619950029                                        | 3052.6538 | 3061.8384 | 3093.8677 |
| H,0,1.7394256937,-1.6432908194,1.1037137012                                        | 3097.6281 | 3103.4076 | 3107.4304 |
| H,0,3.543831104,-1.3006644854,1.2567534703                                         | 3126.4559 | 3134.476  | 3151.2825 |
| O,0,-1.2547804165,1.5058224541,1.782323402                                         | 3151.594  | 3169.3098 | 3234.6276 |
| O,0,-0.4150246455,-0.2435665426,1.4778267662                                       |           |           |           |
| O,0,-2.2282586828,1.2720955702,0.9542931879                                        |           |           |           |
| UM06-2X/6-311++G(2df,2p): E = -615.8396136 Hartree                                 |           |           |           |
| RHF-UCCSD(T)-F12a/cc-pVDZ-F12 // M06-2X/6-311++G(2df,2p): E = -615.1319601 Hartree |           |           |           |
| TS-POZ4-Anti-2b                                                                    |           |           |           |
| 0,1                                                                                |           |           |           |
| C,0,-0.8480758525,1.3583761661,-0.0287753855                                       | -564.304  | 47.4144   | 70.3241   |
| C,0,0.5172815243,1.6367505145,0.5927138668                                         | 152.0717  | 174.0734  | 180.0039  |
| C,0,1.5450741347,0.5677601499,0.3226678744                                         | 183.7895  | 203.7001  | 252.4421  |
| C,0,0.8342105836,-1.1252897351,0.6207477941                                        | 274.8927  | 323.7321  | 343.5632  |
| C,0,-0.5855588103,-1.1360504796,0.0752810525                                       | 365.1901  | 377.9141  | 427.7739  |
| C,0,-1.4485025916,0.058879116,0.5059711017                                         | 436.4247  | 486.0777  | 499.7055  |
| H,0,0.9192283529,2.5915199205,0.2420143007                                         | 539.2812  | 579.6305  | 589.0208  |
| H,0,0.4174371321,1.7210431144,1.6765066602                                         | 606.579   | 682.0449  | 734.2672  |
| H,0,-1.4290697897,0.1086358158,1.6041019329                                        | 794.7397  | 814.6884  | 886.481   |
| H,0,-0.7493118698,1.3003505495,-1.1144636178                                       | 911.1877  | 928.4124  | 946.1122  |
| H,0,0.9285038308,-1.0198374985,1.7147376817                                        | 967.5255  | 986.937   | 1011.0509 |
| H,0,-1.0428447943,-2.0754375511,0.3926081389                                       | 1023.6282 | 1043.7238 | 1045.1717 |
| H,0,-0.5225660614,-1.1681809544,-1.0143890576                                      | 1070.9049 | 1093.2957 | 1103.2871 |
| H,0,-1.5146196868,2.1929388685,0.1913844864                                        | 1133.3344 | 1170.8246 | 1212.8133 |
| C,0,2.8098333214,0.5896595157,1.1379206379                                         | 1229.4421 | 1265.6935 | 1273.7169 |
| H,0,2.5769842767,0.8579912283,2.1660025325                                         | 1284.4259 | 1297.8733 | 1321.4224 |
| H,0,3.3145865231,-0.370400005,1.1060699754                                         | 1335.8848 | 1357.5646 | 1367.2676 |
| H,0,3.4768220621,1.3463382682,0.7182986954                                         | 1408.8417 | 1414.1974 | 1417.4983 |
| C,0,-2.8897280076,-0.1703315529,0.1045009308                                       | 1420.7157 | 1453.818  | 1471.6156 |
| C,0,-3.655654511,-1.1239507553,0.9789653121                                        | 1473.4966 | 1483.185  | 1490.5483 |
| H,0,-4.6539582112,-1.3072699141,0.5874332898                                       | 1497.3763 | 1500.0741 | 1502.274  |
| H,0,-3.1435262037,-2.0829679133,1.071481073                                        | 1506.2766 | 1735.8812 | 2985.1919 |
| H,0,-3.7502680219,-0.7165631385,1.9882290561                                       | 2986.9977 | 3044.3349 | 3048.3462 |
| C,0,-3.4542510673,0.4153226843,-0.9447676797                                       | 3057.6041 | 3065.4121 | 3066.0366 |

|                                                                                   |           |           |           |
|-----------------------------------------------------------------------------------|-----------|-----------|-----------|
| H <sub>0</sub> , -2.9230137507, 1.1161606986, -1.5735170503                       | 3095.8971 | 3097.8488 | 3106.2304 |
| H <sub>0</sub> , -4.4815724988, 0.2038725603, -1.2108030322                       | 3115.5476 | 3144.1631 | 3148.0624 |
| O <sub>0</sub> , 2.5468585117, -0.6279457555, -1.2008545475                       | 3150.918  | 3180.8732 | 3232.6792 |
| O <sub>0</sub> , 1.6959522977, 0.3371455809, -0.9896380286                        |           |           |           |
| O <sub>0</sub> , 1.6933478378, -1.8783834682, 0.0582421658                        |           |           |           |
| UM06-2X/6-311++G(2df,2p): E = -615.8464515 Hartree                                |           |           |           |
| RHF-UCCSD(T)-F12a/cc-pVDZ-F12 // M06-2X/6-311++G(2df,2p): E = -615.125689 Hartree |           |           |           |
| TS-POZ4-Anti-2a                                                                   |           |           |           |
| 0,1                                                                               |           |           |           |
| C <sub>0</sub> , -0.802721654, 1.7362846827, -0.1576914564                        | -553.6741 | 41.099    | 51.5473   |
| C <sub>0</sub> , 0.5610013538, 1.9602078959, 0.4668006664                         | 97.4482   | 160.9582  | 173.7134  |
| C <sub>0</sub> , 1.6443076613, 0.9343386068, 0.063782896                          | 194.6437  | 242.5954  | 261.307   |
| C <sub>0</sub> , 0.8455119087, -0.6351930305, 0.6326060426                        | 266.8979  | 315.2903  | 347.9331  |
| C <sub>0</sub> , -0.5217379193, -0.7206988, 0.0084023075                          | 370.147   | 403.6311  | 407.6813  |
| C <sub>0</sub> , -1.4351944787, 0.4553575575, 0.3737647887                        | 435.3697  | 481.1346  | 508.4803  |
| H <sub>0</sub> , 0.9645903816, 2.929948502, 0.1678624814                          | 516.5447  | 561.6253  | 590.3162  |
| H <sub>0</sub> , 0.4857180374, 1.973411795, 1.557382896                           | 618.4085  | 699.6201  | 732.4239  |
| H <sub>0</sub> , -1.4821206896, 0.529638573, 1.4691201454                         | 772.7398  | 805.5626  | 877.9851  |
| H <sub>0</sub> , -0.6878415785, 1.6714108111, -1.2413973942                       | 907.6352  | 924.7216  | 955.5099  |
| H <sub>0</sub> , 0.9061870813, -0.6605144191, 1.7185295013                        | 959.4367  | 992.6781  | 1013.9368 |
| H <sub>0</sub> , -0.9488632992, -1.6706944898, 0.3422027911                       | 1016.0737 | 1050.3124 | 1058.866  |
| H <sub>0</sub> , -0.4111009509, -0.7622345581, -1.0725116849                      | 1069.7105 | 1081.158  | 1103.2205 |
| H <sub>0</sub> , -1.4511044813, 2.5867431225, 0.0580846741                        | 1153.1453 | 1180.5531 | 1193.6035 |
| C <sub>0</sub> , 2.9302018721, 1.0737650917, 0.8717560289                         | 1220.1747 | 1246.7625 | 1271.0966 |
| H <sub>0</sub> , 2.7529219209, 1.0249438471, 1.9464670815                         | 1287.2143 | 1299.2845 | 1344.1096 |
| H <sub>0</sub> , 3.6332947326, 0.2972646249, 0.5805349197                         | 1344.8778 | 1353.5828 | 1369.9629 |
| H <sub>0</sub> , 3.3779282825, 2.0425134458, 0.6448540476                         | 1392.3884 | 1409.2877 | 1415.0925 |
| C <sub>0</sub> , -2.8449965789, 0.1920735387, -0.1098964078                       | 1429.0404 | 1459.6375 | 1469.5052 |
| C <sub>0</sub> , -3.6270085285, -0.8123801802, 0.6905843959                       | 1477.9309 | 1487.8198 | 1489.9339 |
| H <sub>0</sub> , -4.6171498034, -0.9680843047, 0.2677306181                       | 1492.4252 | 1498.6875 | 1513.932  |
| H <sub>0</sub> , -3.1208555616, -1.7783896119, 0.7313766384                       | 1517.3605 | 1740.0349 | 3020.2905 |
| H <sub>0</sub> , -3.7424273714, -0.4698436927, 1.7214675125                       | 3036.4257 | 3045.6355 | 3051.3871 |
| C <sub>0</sub> , -3.3750550093, 0.802811292, -1.1625871615                        | 3057.7249 | 3061.3317 | 3089.9534 |
| H <sub>0</sub> , -2.8341223773, 1.538733265, -1.740385497                         | 3102.703  | 3118.1657 | 3125.543  |
| H <sub>0</sub> , -4.3843713331, 0.5777413235, -1.481695438                        | 3126.4763 | 3138.7429 | 3143.5352 |
| O <sub>0</sub> , 1.8157913326, -1.3259285033, -1.1816858309                       | 3156.846  | 3161.7145 | 3244.6097 |
| O <sub>0</sub> , 1.7827813138, 0.6874538764, -1.1805847445                        |           |           |           |
| O <sub>0</sub> , 1.8037857964, -1.4103297914, 0.1163291124                        |           |           |           |
| UM06-2X/6-311++G(2df,2p): E = -615.8340532 Hartree                                |           |           |           |
| RHF-UCCSD(T)-F12a/cc-pVDZ-F12 // M06-2X/6-311++G(2df,2p): E = -615.125689 Hartree |           |           |           |
| Syn-2a                                                                            |           |           |           |
| 0,1                                                                               |           |           |           |
| C <sub>0</sub> , -0.9142504049, 0.8758759086, -1.2773900353                       | 36.4282   | 46.0105   | 55.6021   |
| C <sub>0</sub> , 0.1147217533, 2.0001826258, -1.1352864517                        | 77.4659   | 81.1371   | 122.0346  |
| C <sub>0</sub> , 1.5669607476, 1.574466574, -1.1918741218                         | 145.2278  | 179.0976  | 193.0882  |
| C <sub>0</sub> , 0.7199254807, 0.098970331, 1.2045312757                          | 208.2571  | 216.1838  | 254.1466  |
| C <sub>0</sub> , -0.6520742414, -0.3815566036, 0.9641236355                       | 295.527   | 329.4797  | 339.0328  |
| C <sub>0</sub> , -1.5753513063, 0.4690196959, 0.0422800754                        | 432.3598  | 451.9022  | 473.3408  |
| H <sub>0</sub> , -0.0071584076, 2.7364398617, -1.9350530174                       | 511.5957  | 540.4936  | 559.2866  |
| H <sub>0</sub> , -0.0284047486, 2.5605209861, -0.2039866449                       | 613.1556  | 707.5972  | 728.8716  |
| H <sub>0</sub> , -1.8125949055, 1.3766550201, 0.5993051393                        | 756.875   | 804.0165  | 853.248   |
| H <sub>0</sub> , -0.4413427076, 0.0134653253, -1.7528570437                       | 882.7208  | 917.3393  | 920.9983  |
| H <sub>0</sub> , 1.6007299001, -0.4755625271, 0.940923357                         | 947.9366  | 961.1572  | 971.0804  |
| H <sub>0</sub> , -1.1163514646, -0.4129211676, 1.9565243221                       | 997.7752  | 1012.0477 | 1027.2443 |
| H <sub>0</sub> , -0.5858583082, -1.3932073339, 0.5643461076                       | 1055.7131 | 1076.8041 | 1086.2119 |
| H <sub>0</sub> , -1.7060262279, 1.2135968375, -1.9447514561                       | 1102.5228 | 1134.1837 | 1197.6655 |
| C <sub>0</sub> , 2.5752601562, 2.6570810326, -0.910489243                         | 1220.6237 | 1234.8991 | 1269.2553 |

|                                                                                    |           |           |           |
|------------------------------------------------------------------------------------|-----------|-----------|-----------|
| H,0,2.4998698362,2.9205954359,0.1475838062                                         | 1282.0583 | 1312.8882 | 1345.1004 |
| H,0,3.5784870126,2.3038671174,-1.129624893                                         | 1364.2075 | 1388.8934 | 1406.2582 |
| H,0,2.352024106,3.5575920135,-1.4821144879                                         | 1409.1266 | 1420.2707 | 1422.5003 |
| C,0,-2.8599830697,-0.3180916996,-0.1322710811                                      | 1450.3112 | 1454.5488 | 1461.1947 |
| C,0,-3.7288808205,-0.4208539319,1.0915549318                                       | 1471.8902 | 1485.0184 | 1491.0795 |
| H,0,-4.6769478862,-0.9011179721,0.8591093579                                       | 1499.5546 | 1507.3785 | 1650.9397 |
| H,0,-3.2448768168,-1.0030796452,1.8783841658                                       | 1733.0707 | 1826.4168 | 3026.3366 |
| H,0,-3.9294335094,0.5682840436,1.5073519375                                        | 3031.5573 | 3050.6217 | 3052.5354 |
| C,0,-3.2076094219,-0.8984732281,-1.275110149                                       | 3059.0233 | 3070.2846 | 3082.4736 |
| H,0,-2.5960249446,-0.8446013849,-2.1646895879                                      | 3107.8097 | 3113.2716 | 3116.1897 |
| H,0,-4.1326279984,-1.4547368852,-1.3528738133                                      | 3120.2449 | 3142.3989 | 3154.8132 |
| O,0,-0.0422751777,1.9840632415,2.1419277856                                        | 3179.2977 | 3221.0773 | 3237.0632 |
| O,0,1.9032839933,0.4352249141,-1.4143509273                                        |           |           |           |
| O,0,0.9917753817,1.1725414147,1.776422506                                          |           |           |           |
| UM06-2X/6-311++G(2df,2p): E = -615.8999996 Hartree                                 |           |           |           |
| RHF-UCCSD(T)-F12a/cc-pVDZ-F12 // M06-2X/6-311++G(2df,2p): E = -615.179262 Hartree  |           |           |           |
| Anti-2a                                                                            |           |           |           |
| 0,1                                                                                |           |           |           |
| C,0,-0.876195693,0.953986456,-1.4426487224                                         | 33.8777   | 62.6457   | 66.2765   |
| C,0,0.4389374612,1.7290769687,-1.4654932415                                        | 116.2399  | 127.7486  | 138.5119  |
| C,0,1.6923957565,0.8754503215,-1.51673301                                          | 147.8455  | 151.4345  | 175.384   |
| C,0,0.8922480883,-0.2402331213,1.0292071934                                        | 203.0016  | 236.5728  | 244.4141  |
| C,0,-0.4031767218,-0.6849557785,0.4644060128                                       | 275.1591  | 305.8931  | 346.7706  |
| C,0,-1.3195697677,0.4354374591,-0.0681039556                                       | 381.482   | 440.3326  | 461.9234  |
| H,0,0.479856851,2.3607420912,-2.3588031033                                         | 488.6697  | 525.1325  | 548.5541  |
| H,0,0.5273580756,2.4171195204,-0.6197319768                                        | 615.631   | 655.8004  | 731.1152  |
| H,0,-1.277920162,1.2676207529,0.6418653251                                         | 760.9571  | 777.2434  | 828.1393  |
| H,0,-0.7935143784,0.1182952873,-2.1399571838                                       | 873.5917  | 911.7294  | 941.7031  |
| H,0,1.7519533682,-0.8984692354,1.1407725863                                        | 958.8628  | 967.2251  | 988.5084  |
| H,0,-0.9032173575,-1.2515505391,1.2588213146                                       | 999.0042  | 1012.4472 | 1024.5307 |
| H,0,-0.1845550367,-1.4008998867,-0.3300097547                                      | 1056.7698 | 1072.7323 | 1076.2982 |
| H,0,-1.6687821577,1.6042848573,-1.8137783058                                       | 1110.6755 | 1132.2696 | 1187.5108 |
| C,0,2.9910252631,1.5876615288,-1.2734396588                                        | 1214.2829 | 1240.3196 | 1268.3622 |
| H,0,3.0787934142,1.7335155231,-0.1900995076                                        | 1298.3127 | 1323.6341 | 1350.796  |
| H,0,3.8227549413,0.9849283159,-1.6265582867                                        | 1369.0361 | 1387.5287 | 1405.144  |
| H,0,2.9968645557,2.5710618313,-1.742416866                                         | 1412.9567 | 1417.1412 | 1417.5704 |
| C,0,-2.7456991274,-0.0841254293,-0.0560769733                                      | 1436.715  | 1450.4342 | 1461.2385 |
| C,0,-3.4291233404,-0.0256588014,1.2815863893                                       | 1474.6375 | 1484.467  | 1486.774  |
| H,0,-4.4057898193,-0.5036036558,1.2524236764                                       | 1490.5554 | 1499.2065 | 1667.0549 |
| H,0,-2.8348297895,-0.5088529247,2.0604974943                                       | 1742.2368 | 1815.8298 | 3023.3311 |
| H,0,-3.5605845877,1.0136387965,1.5903993308                                        | 3035.6701 | 3039.9176 | 3040.4493 |
| C,0,-3.3550699117,-0.5662044763,-1.1318591741                                      | 3044.412  | 3068.2627 | 3080.4767 |
| H,0,-2.8820107179,-0.5948969155,-2.103387509                                       | 3089.7333 | 3102.2756 | 3110.2516 |
| H,0,-4.3652475101,-0.9491060017,-1.0698220135                                      | 3115.5258 | 3136.982  | 3160.4514 |
| O,0,2.2611010344,1.2945393831,1.9252026467                                         | 3163.4182 | 3178.459  | 3242.0449 |
| O,0,1.6386157788,-0.3173833457,-1.7149431837                                       |           |           |           |
| O,0,1.0361064503,0.9273964884,1.4166828671                                         |           |           |           |
| UM06-2X/6-311++G(2df,2p): E = -615.8998347 Hartree                                 |           |           |           |
| RHF-UCCSD(T)-F12a/cc-pVDZ-F12 // M06-2X/6-311++G(2df,2p): E = -615.1781127 Hartree |           |           |           |
| Syn-2b                                                                             |           |           |           |
| 0,1                                                                                |           |           |           |
| C,0,-0.7046638752,-1.5139144069,-0.0938654859                                      |           | 37.7243   | 54.4064   |
| C,0,0.6559516682,-1.69723173,-0.7676793813                                         | 98.9522   | 133.3527  | 147.6635  |
| C,0,1.8122206946,-1.0767867533,-0.0613630729                                       | 152.5073  | 160.1846  | 179.6229  |
| C,0,0.5437483268,1.624897128,0.0736158457                                          | 181.8542  | 259.3039  | 298.8685  |
| C,0,-0.6852128797,0.9705416574,0.6396873156                                        | 321.7543  | 325.8695  | 345.0936  |
| C,0,-1.3332504262,-0.1173232949,-0.2378944462                                      | 355.8975  | 381.9334  | 473.6247  |

|                                                                                    |           |           |           |
|------------------------------------------------------------------------------------|-----------|-----------|-----------|
| H,0,0.8820578448,-2.7627133892,-0.8854998678                                       | 505.6805  | 562.0977  | 579.018   |
| H,0,0.6482452221,-1.2774875582,-1.7768946494                                       | 635.6001  | 684.1201  | 727.0459  |
| H,0,-1.2070885278,0.1968658404,-1.2796416322                                       | 743.157   | 805.3625  | 828.2671  |
| H,0,-0.6286020485,-1.7854639995,0.9601843676                                       | 898.485   | 910.8181  | 953.4777  |
| H,0,1.0189847419,2.3792126141,0.7222856014                                         | 957.2076  | 980.3736  | 986.8258  |
| H,0,-1.390548068,1.7895640025,0.8191196313                                         | 996.9556  | 1027.8665 | 1040.0782 |
| H,0,-0.4358807116,0.5876892894,1.6328325599                                        | 1053.8346 | 1062.7364 | 1080.8698 |
| H,0,-1.3893875639,-2.2278172824,-0.5521494662                                      | 1108.951  | 1142.0889 | 1212.99   |
| C,0,3.1279000061,-0.8513835289,-0.6806367828                                       | 1238.4805 | 1258.7283 | 1269.4533 |
| H,0,3.1892013754,-1.3232704451,-1.6566626331                                       | 1288.2354 | 1323.3562 | 1351.606  |
| H,0,3.2694928838,0.2290535076,-0.7653417155                                        | 1384.7024 | 1392.5319 | 1414.1391 |
| H,0,3.9034126542,-1.2042510538,0.0002895672                                        | 1416.3805 | 1423.9174 | 1426.9783 |
| C,0,-2.8234650681,-0.1264569981,0.053195028                                        | 1454.8367 | 1460.0419 | 1465.9056 |
| C,0,-3.6116284696,0.9431321657,-0.6498202301                                       | 1469.9551 | 1479.2603 | 1489.3816 |
| H,0,-4.6441815722,0.9690485949,-0.308352784                                        | 1493.0751 | 1507.6576 | 1650.5676 |
| H,0,-3.1732917705,1.9312709433,-0.4945895987                                       | 1738.5883 | 1838.7517 | 2981.1803 |
| H,0,-3.6062939778,0.7655196611,-1.7275006611                                       | 3016.9882 | 3034.6871 | 3042.4156 |
| C,0,-3.4026144905,-0.9908926998,0.877412157                                        | 3048.433  | 3057.0931 | 3059.8186 |
| H,0,-2.8504970327,-1.7749595384,1.3771563201                                       | 3078.3636 | 3087.4079 | 3114.5621 |
| H,0,-4.4643073373,-0.9385101378,1.0795174206                                       | 3116.2814 | 3138.5269 | 3144.0411 |
| O,0,2.5941782557,0.0020826544,1.7523589657                                         | 3154.5617 | 3167.0372 | 3235.4862 |
| O,0,1.6055552322,-0.7105353214,1.1145035851                                        |           |           |           |
| O,0,1.0002465038,1.379681109,-1.0138149681                                         |           |           |           |
| UM06-2X/6-311++G(2df,2p): E = -615.9016464 Hartree                                 |           |           |           |
| RHF-UCCSD(T)-F12a/cc-pVDZ-F12 // M06-2X/6-311++G(2df,2p): E = -615.1801911 Hartree |           |           |           |
| Anti-2b                                                                            |           |           |           |
| 0,1                                                                                |           |           |           |
| C,0,3.0586454817,-4.1410562224,-1.260335828                                        |           | 57.1323   | 64.5969   |
|                                                                                    |           |           | 96.3442   |
| C,0,2.3328786564,-3.3559140969,-0.1449142268                                       | 105.3741  | 145.9392  | 165.969   |
| C,0,2.5708077306,-1.8919498075,-0.0698021119                                       | 181.7531  | 196.5801  | 207.518   |
| C,0,5.3762192594,-1.3086888027,-1.7341186714                                       | 216.4804  | 252.7108  | 272.4352  |
| C,0,4.6274385006,-2.4588392711,-2.3348752214                                       | 297.9348  | 323.2434  | 336.183   |
| C,0,4.5195489568,-3.7246802166,-1.4543184072                                       | 362.8453  | 436.1017  | 489.9251  |
| H,0,1.2551532193,-3.4713963322,-0.296890767                                        | 496.6775  | 548.7836  | 553.5008  |
| H,0,2.6061915228,-3.7728825123,0.8244629143                                        | 619.5015  | 674.0631  | 711.5423  |
| H,0,4.9388872517,-3.4702325499,-0.4737990088                                       | 733.0906  | 796.8376  | 826.6514  |
| H,0,2.5062678831,-4.0324622399,-2.1911398194                                       | 872.8658  | 918.011   | 943.398   |
| H,0,5.5113391842,-0.440685289,-2.4054621716                                        | 953.5795  | 957.0849  | 988.4064  |
| H,0,5.0982014176,-2.6830917338,-3.2971091906                                       | 995.7697  | 1023.3535 | 1037.3756 |
| H,0,3.6310184579,-2.0792788706,-2.6045582938                                       | 1060.2849 | 1066.1678 | 1074.8264 |
| H,0,3.0153061945,-5.1880501159,-0.9615646254                                       | 1117.5341 | 1132.8997 | 1202.1038 |
| C,0,3.213715849,-1.2493436982,1.1032807807                                         | 1229.4627 | 1244.7525 | 1273.984  |
| H,0,4.2186055256,-1.6563368131,1.2254161758                                        | 1295.9297 | 1318.3203 | 1348.811  |
| H,0,3.2731899793,-0.1729052479,0.9730121984                                        | 1384.6521 | 1389.7953 | 1410.8059 |
| H,0,2.6401580237,-1.4898596229,2.0006673397                                        | 1415.5827 | 1417.3486 | 1429.1473 |
| C,0,5.4099595587,-4.8043609649,-2.03202103                                         | 1446.7437 | 1452.632  | 1456.4379 |
| C,0,6.8811099389,-4.5281308283,-1.895864114                                        | 1458.8829 | 1487.7233 | 1490.4289 |
| H,0,7.4793163585,-5.3133783108,-2.3528798456                                       | 1494.7425 | 1502.935  | 1654.4858 |
| H,0,7.1480791668,-3.5774058012,-2.3640241452                                       | 1735.8052 | 1838.4874 | 3021.0165 |
| H,0,7.1569192938,-4.4413609062,-0.8429433255                                       | 3035.1262 | 3036.9084 | 3041.2784 |
| C,0,4.9531951691,-5.8895765309,-2.6449735063                                       | 3045.4368 | 3053.3685 | 3062.3551 |
| H,0,3.8971066125,-6.092634532,-2.7567734921                                        | 3088.7803 | 3091.8792 | 3096.0725 |
| H,0,5.6364368883,-6.6149625389,-3.066803076                                        | 3108.8365 | 3113.9356 | 3140.1713 |
| O,0,1.5667547186,-1.6794479909,-2.0667232634                                       | 3154.1251 | 3174.2465 | 3233.7086 |
| O,0,2.1691638821,-1.1210300001,-0.9695998867                                       |           |           |           |
| O,0,5.8037214487,-1.268715573,-0.6090625709                                        |           |           |           |
| UM06-2X/6-311++G(2df,2p): E = -615.9044705 Hartree                                 |           |           |           |

| RHF-UCCSD(T)-F12a/cc-pVDZ-F12 // M06-2X/6-311++G(2df,2p): E = -615.182069 Hartree  |            |           |           |
|------------------------------------------------------------------------------------|------------|-----------|-----------|
| TS-2POZ-IPOZ                                                                       |            |           |           |
| 0,1                                                                                |            |           |           |
| C,0,0.5923478568,1.270722079,-0.7146985843                                         | -89.2648   | 49.4892   | 76.1294   |
| C,0,-0.8916352447,1.0724293344,-1.0141403099                                       | 152.6727   | 174.7571  | 191.0722  |
| C,0,-1.6636578602,0.5164509222,0.1841762367                                        | 210.5906   | 233.1837  | 252.3958  |
| C,0,-0.9696943767,-0.7144672297,0.7639540641                                       | 274.108    | 343.9546  | 375.6502  |
| C,0,0.5327179865,-0.6118941115,0.9297392345                                        | 392.9027   | 415.8879  | 451.0965  |
| C,0,1.2461182327,-0.0476892885,-0.3094020916                                       | 487.7478   | 534.2571  | 552.0506  |
| H,0,-1.3574607342,2.0082453457,-1.3265233132                                       | 616.9331   | 674.3913  | 723.8579  |
| H,0,-1.0043496472,0.36526333,-1.8374216728                                         | 741.7822   | 762.644   | 809.8251  |
| H,0,1.0915591658,-0.7635909781,-1.1254101341                                       | 875.0799   | 904.1775  | 910.102   |
| H,0,0.7238550157,2.0039001533,0.0871781466                                         | 933.0219   | 949.1597  | 959.702   |
| H,0,-1.4553609016,-1.0014349199,1.7027629444                                       | 975.195    | 999.8064  | 1011.6689 |
| H,0,0.9150959252,-1.5980113406,1.1926848505                                        | 1022.4597  | 1036.6573 | 1042.7189 |
| H,0,0.7293997354,0.0445988637,1.782913226                                          | 1064.9007  | 1079.0886 | 1108.6503 |
| H,0,1.0908862271,1.6776667697,-1.595149199                                         | 1150.1276  | 1175.4697 | 1186.7739 |
| C,0,-2.0044190192,1.564763914,1.224248089                                          | 1216.2262  | 1256.8154 | 1269.5664 |
| H,0,-2.6362261886,2.3352554593,0.7847352341                                        | 1293.1918  | 1311.4986 | 1320.6711 |
| H,0,-2.5338525856,1.1151791149,2.0624496539                                        | 1342.1113  | 1366.8009 | 1373.4394 |
| H,0,-1.0942920703,2.0387302132,1.5915753292                                        | 1384.9714  | 1408.5177 | 1412.6464 |
| C,0,2.7375572921,0.0318499137,-0.0686530469                                        | 1418.6707  | 1423.0449 | 1459.4788 |
| C,0,3.4258483946,-1.2827300206,0.1856700888                                        | 1477.8993  | 1488.2053 | 1489.6492 |
| H,0,4.5074681919,-1.1694089288,0.1601635217                                        | 1495.6373  | 1499.5882 | 1508.6002 |
| H,0,3.1550259854,-1.6904134854,1.1611872369                                        | 1511.2918  | 1736.4734 | 3020.7592 |
| H,0,3.1349849792,-2.0237085007,-0.5618543934                                       | 3038.358   | 3040.0007 | 3047.2274 |
| C,0,3.418804881,1.171905168,-0.0792620972                                          | 3057.3028  | 3058.2418 | 3061.8632 |
| H,0,2.9491491735,2.1288784859,-0.2573010822                                        | 3090.2804  | 3093.6915 | 3107.0348 |
| H,0,4.4875962012,1.1787237754,0.0903765281                                         | 3108.6775  | 3135.4698 | 3139.2148 |
| O,0,-2.6290869684,-1.4456608109,-0.5369716182                                      | 3146.1682  | 3161.9956 | 3245.4888 |
| O,0,-1.2657099583,-1.6693071243,-0.2345339007                                      |            |           |           |
| O,0,-2.8932742892,-0.0556125634,-0.250895621                                       |            |           |           |
| UM06-2X/6-311++G(2df,2p): E = -615.87979824 Hartree                                |            |           |           |
| RHF-UCCSD(T)-F12a/cc-pVDZ-F12 // M06-2X/6-311++G(2df,2p): E = -615.1593155 Hartree |            |           |           |
| TS-Syn-2a-H-Shift                                                                  |            |           |           |
| 0,1                                                                                |            |           |           |
| C,0,0.3135829299,-1.5098544974,0.5678873447                                        | -1563.5397 | 43.6585   | 48.8944   |
| C,0,-1.1415698961,-1.2755445288,0.9607629137                                       | 52.9589    | 63.9569   | 89.2945   |
| C,0,-2.0906974588,-1.0810935792,-0.211739418                                       | 112.9413   | 154.0028  | 156.9993  |
| C,0,-0.2776923578,1.801785714,-0.2575117415                                        | 174.6527   | 188.6662  | 278.1802  |
| C,0,0.4906697083,0.6977742785,-0.6565941129                                        | 303.112    | 337.3952  | 349.795   |
| C,0,1.0991947127,-0.2065439533,0.406742165                                         | 421.9444   | 462.1767  | 475.085   |
| H,0,-1.5360416928,-2.1451190803,1.4971045412                                       | 498.9554   | 531.3688  | 542.8594  |
| H,0,-1.2474250705,-0.4366676918,1.655536527                                        | 585.6794   | 620.3649  | 732.7798  |
| H,0,1.050963142,0.3291600012,1.3648389751                                          | 746.7659   | 774.4304  | 826.3662  |
| H,0,0.3249450069,-2.0697690619,-0.3684745085                                       | 848.408    | 908.9727  | 928.3811  |
| H,0,-0.62348967,2.0452160478,0.7435711342                                          | 950.7151   | 960.9092  | 966.7501  |
| H,0,1.0311651587,1.5007445055,-1.531268714                                         | 985.3643   | 995.0313  | 1017.9613 |
| H,0,0.1053047503,0.1699626205,-1.5335875967                                        | 1038.7741  | 1070.3168 | 1079.6942 |
| H,0,0.808356523,-2.1229001082,1.3213513203                                         | 1109.1013  | 1143.7277 | 1182.0181 |
| C,0,-3.3936173727,-0.3866596298,0.0960521238                                       | 1190.7854  | 1219.8106 | 1236.0548 |
| H,0,-3.1930416179,0.6710849587,0.2834760406                                        | 1260.7537  | 1289.5262 | 1334.5316 |
| H,0,-4.0761716134,-0.4782801403,-0.7432955384                                      | 1342.8381  | 1375.6515 | 1379.5052 |
| H,0,-3.8426471307,-0.7936200222,1.0026794912                                       | 1395.236   | 1404.3592 | 1416.4775 |
| C,0,2.5759947078,-0.4056952763,0.1134681955                                        | 1431.8737  | 1459.3345 | 1465.3271 |
| C,0,3.4337717472,0.8079659298,0.3350861002                                         | 1468.6942  | 1481.9739 | 1484.9693 |
| H,0,4.4695465544,0.6161761255,0.0638563961                                         | 1495.7064  | 1504.2562 | 1602.6466 |

|                                                                                    |            |           |           |
|------------------------------------------------------------------------------------|------------|-----------|-----------|
| H,0,3.0764929679,1.6565577255,-0.2511316337                                        | 1735.572   | 1851.4284 | 1869.0101 |
| H,0,3.4025488133,1.108429933,1.3852809535                                          | 2997.8714  | 3035.044  | 3044.9241 |
| C,0,3.0853981427,-1.5567840592,-0.3066418705                                       | 3046.2938  | 3064.0066 | 3074.6344 |
| H,0,2.4813139808,-2.4395902867,-0.4595994555                                       | 3087.7993  | 3103.7146 | 3113.2091 |
| H,0,4.1430411329,-1.6473831158,-0.5162142387                                       | 3116.7321  | 3139.8502 | 3158.2824 |
| O,0,0.2710820763,2.4694455868,-2.2543196761                                        | 3164.5445  | 3170.5655 | 3248.5026 |
| O,0,-1.8298084383,-1.4830485972,-1.3158463584                                      |            |           |           |
| O,0,-0.4014359462,2.7716283817,-1.0877222089                                       |            |           |           |
| UM06-2X/6-311++G(2df,2p): E = -615.8723957 Hartree                                 |            |           |           |
| RHF-UCCSD(T)-F12a/cc-pVDZ-F12 // M06-2X/6-311++G(2df,2p): E = -615.1534784 Hartree |            |           |           |
| TS-Syn-2a-H-Shift-02                                                               |            |           |           |
| 0,1                                                                                |            |           |           |
| C,0,0.3037639076,-1.4882125602,0.7480566402                                        | -1566.8949 | 45.3998   | 60.2303   |
| C,0,-1.1789322196,-1.2309249126,0.9959350676                                       | 66.7825    | 82.5563   | 82.951    |
| C,0,-2.0463239247,-1.3714304238,-0.24750525                                        | 97.3142    | 120.5912  | 175.6108  |
| C,0,0.4319457903,1.9137467811,-0.7912897489                                        | 190.1262   | 224.5327  | 286.2038  |
| C,0,0.4403615131,0.5097530998,-0.7700572309                                        | 307.0279   | 327.1933  | 346.5036  |
| C,0,1.0845445971,-0.2150512687,0.402743394                                         | 432.5072   | 451.6206  | 477.3722  |
| H,0,-1.5814245091,-1.9592473935,1.7074944234                                       | 496.2302   | 519.3814  | 539.4542  |
| H,0,-1.3564967554,-0.2497321076,1.445268071                                        | 596.73     | 623.9952  | 726.8468  |
| H,0,1.0142290355,0.4500973477,1.2739152649                                         | 752.52     | 772.5536  | 824.5888  |
| H,0,0.3868496366,-2.2055403535,-0.0696731699                                       | 840.1773   | 906.9651  | 925.4851  |
| H,0,0.9763430045,2.5947154354,-0.1432759823                                        | 961.5698   | 966.5757  | 970.8447  |
| H,0,0.5978388309,0.0377926924,-1.7445086041                                        | 979.4006   | 1003.1879 | 1014.3233 |
| H,0,-0.8028680562,0.5916673549,-1.1613999056                                       | 1040.4434  | 1069.9097 | 1083.8737 |
| H,0,0.7614476096,-1.9401909055,1.6281270473                                        | 1104.3764  | 1148.7412 | 1178.5216 |
| C,0,-3.382450847,-0.6767423803,-0.21381694                                         | 1185.8216  | 1224.8872 | 1235.186  |
| H,0,-3.2123081371,0.3842423322,-0.4166376319                                       | 1262.3438  | 1293.0974 | 1335.8764 |
| H,0,-4.033422683,-1.0801528618,-0.9838191333                                       | 1347.6027  | 1366.2728 | 1378.4939 |
| H,0,-3.8466372038,-0.7589667918,0.7689435462                                       | 1394.5097  | 1403.1228 | 1413.9541 |
| C,0,2.5641724802,-0.4510508918,0.1593211562                                        | 1424.5912  | 1456.2726 | 1462.3073 |
| C,0,3.3984864301,0.7920018012,0.0096457634                                         | 1469.5062  | 1481.6561 | 1489.2092 |
| H,0,4.4581039726,0.5507326076,-0.0363917431                                        | 1496.8448  | 1505.4441 | 1605.9163 |
| H,0,3.1390178771,1.3350573617,-0.9016723557                                        | 1734.6719  | 1845.6134 | 1916.9115 |
| H,0,3.2385136452,1.4721429108,0.8505361375                                         | 2998.9745  | 3042.9973 | 3044.5553 |
| C,0,3.1105465429,-1.6581949315,0.0779904771                                        | 3050.2927  | 3064.9556 | 3072.5055 |
| H,0,2.5336311652,-2.5663575301,0.1739979385                                        | 3085.531   | 3100.1259 | 3121.3244 |
| H,0,4.1725323088,-1.7718080052,-0.0964863138                                       | 3124.0258  | 3142.2697 | 3157.91   |
| O,0,-1.2769446978,1.5385394665,-2.0918465616                                       | 3158.5126  | 3181.6068 | 3241.1537 |
| O,0,-1.6832565389,-2.0092466431,-1.2026981106                                      |            |           |           |
| O,0,-0.4817674647,2.4915125499,-1.4815171356                                       |            |           |           |
| UM06-2X/6-311++G(2df,2p): E = -615.8736858 Hartree                                 |            |           |           |
| RHF-UCCSD(T)-F12a/cc-pVDZ-F12 // M06-2X/6-311++G(2df,2p): E = -615.154405 Hartree  |            |           |           |
| TS-Syn-2a_Dioxirane1                                                               |            |           |           |
| 0,1                                                                                |            |           |           |
| C,0,0.3281342535,-1.2354161642,0.8981302721                                        | -699.6077  | 25.6489   | 69.7056   |
| C,0,-1.1412491794,-0.8675103903,1.097928275                                        | 78.5464    | 82.8689   | 129.3957  |
| C,0,-2.0583911405,-1.274235545,-0.0527033091                                       | 136.1141   | 140.9103  | 155.4855  |
| C,0,-0.1518840648,1.6369195587,-0.8188751595                                       | 158.0544   | 208.4243  | 237.7377  |
| C,0,0.5505340351,0.3596684555,-1.0730545774                                        | 261.879    | 300.871   | 322.5746  |
| C,0,1.1733694093,-0.1159938731,0.2844598024                                        | 382.3002   | 422.4296  | 450.1669  |
| H,0,-1.544442805,-1.3999903432,1.9656371154                                        | 485.2764   | 521.5665  | 554.6933  |
| H,0,-1.2873435076,0.1918955195,1.3221953585                                        | 612.5091   | 644.9306  | 716.0574  |
| H,0,1.1500619513,0.7290480692,0.9882019126                                         | 740.0621   | 769.6204  | 809.2414  |
| H,0,0.3612222163,-2.1148447369,0.2541107896                                        | 836.7478   | 881.8736  | 915.9028  |
| H,0,0.4761285691,2.4747570953,-0.4853983238                                        | 952.571    | 953.0786  | 965.1524  |
| H,0,1.3409211805,0.5589033557,-1.7983196692                                        | 991.1336   | 1006.8404 | 1027.5105 |



|                                                                                    |           |           |           |
|------------------------------------------------------------------------------------|-----------|-----------|-----------|
| H,0,-0.1135732532,-0.386253968,-1.4940883634                                       | 1051.1096 | 1072.7615 | 1073.8504 |
| H,0,0.7801749529,-1.5103427103,1.8514479021                                        | 1107.9022 | 1135.5087 | 1186.8414 |
| C,0,-3.4081388318,-0.6156479928,-0.1070746919                                      | 1214.4693 | 1236.4441 | 1274.1905 |
| H,0,-4.1137628736,-1.2626981751,-0.6207921855                                      | 1281.7282 | 1313.4437 | 1352.1288 |
| H,0,-3.7721749721,-0.3518384768,0.8850750385                                       | 1383.4026 | 1388.2728 | 1395.7256 |
| H,0,-3.2884064296,0.3003837494,-0.6922315863                                       | 1409.9903 | 1419.1516 | 1419.7349 |
| C,0,2.6358221072,-0.4593635698,0.0978868837                                        | 1442.2805 | 1444.3894 | 1455.5374 |
| C,0,3.541438255,0.7268479201,-0.0827722799                                         | 1473.3442 | 1483.7444 | 1485.0668 |
| H,0,4.5619890076,0.4207340094,-0.3014537584                                        | 1489.699  | 1496.6408 | 1603.4583 |
| H,0,3.2013131497,1.3728435054,-0.8959229355                                        | 1745.7275 | 1819.1324 | 3032.1048 |
| H,0,3.5513584976,1.3375173848,0.8232827751                                         | 3043.0408 | 3046.8986 | 3054.0138 |
| C,0,3.1014939581,-1.7016433541,0.0964996578                                        | 3058.1858 | 3070.0558 | 3079.497  |
| H,0,2.4645308498,-2.5619183943,0.2422880103                                        | 3089.3764 | 3096.9531 | 3105.0419 |
| H,0,4.1555868782,-1.8938397174,-0.0552250847                                       | 3116.0256 | 3126.9198 | 3138.9824 |
| O,0,-1.6245363893,1.3342165612,-2.0950390284                                       | 3151.1171 | 3168.5399 | 3233.1483 |
| O,0,-1.7162659399,-2.0997633671,-0.8611446192                                      |           |           |           |
| O,0,-1.3963120447,1.837190924,-0.7259337908                                        |           |           |           |
| UM06-2X/6-311++G(2df,2p): E = -615.8556258 Hartree                                 |           |           |           |
| RHF-UCCSD(T)-F12a/cc-pVDZ-F12 // M06-2X/6-311++G(2df,2p): E = -615.1395845 Hartree |           |           |           |
| TS-Syn-2a_SOZ1                                                                     |           |           |           |
| 0,1                                                                                |           |           |           |
| C,0,0.2642507105,-1.3435615778,0.4850114955                                        | -334.5995 | 65.4252   | 90.2179   |
| C,0,-1.0883659538,-1.0669723278,1.1251410307                                       | 132.6118  | 158.1045  | 172.4828  |
| C,0,-2.0294160209,-0.2836694776,0.240791967                                        | 191.1736  | 197.4827  | 210.4569  |
| C,0,-0.5015796595,1.4217095761,-1.2803482674                                       | 233.3935  | 260.9468  | 267.0224  |
| C,0,0.7381054097,0.6257922979,-1.0909508979                                        | 327.2125  | 355.936   | 385.39    |
| C,0,1.1176136527,-0.0962865229,0.2167970883                                        | 442.8407  | 458.6994  | 478.8277  |
| H,0,-1.5871402751,-2.0175938203,1.3459551261                                       | 523.5743  | 532.7656  | 554.2497  |
| H,0,-0.9764793521,-0.5450907635,2.0759904341                                       | 611.3996  | 725.5577  | 756.6027  |
| H,0,0.9887334067,0.602672913,1.042329891                                           | 778.7729  | 785.556   | 848.6115  |
| H,0,0.1118114031,-1.8918672782,-0.44722682                                         | 887.5479  | 917.6133  | 944.1835  |
| H,0,-0.7269607531,1.7309638806,-2.2981133636                                       | 954.7595  | 968.1632  | 984.2268  |
| H,0,1.5203321754,1.3612367977,-1.3341182854                                        | 996.5271  | 1004.6128 | 1028.2885 |
| H,0,0.7598360028,-0.0931903362,-1.9127430391                                       | 1051.7518 | 1070.1594 | 1075.1004 |
| H,0,0.8276828599,-1.9979397334,1.1508154152                                        | 1098.2098 | 1143.6226 | 1189.0423 |
| C,0,-3.386164952,0.0546054731,0.7992761861                                         | 1212.6012 | 1233.0698 | 1271.615  |
| H,0,-3.3367867562,0.2865603643,1.859905781                                         | 1305.9411 | 1319.3136 | 1347.8979 |
| H,0,-3.7987953791,0.9003235763,0.2555337828                                        | 1396.6484 | 1404.6315 | 1408.3089 |
| H,0,-4.0408284592,-0.8080991854,0.652958328                                        | 1413.761  | 1418.0739 | 1418.3314 |
| C,0,2.6019074611,-0.4108803551,0.1009771232                                        | 1436.4183 | 1455.0667 | 1465.1768 |
| C,0,3.5226546145,0.6972655054,0.5279843889                                         | 1475.5874 | 1482.5183 | 1485.1291 |
| H,0,4.5639411792,0.4559805323,0.3249488606                                         | 1492.008  | 1498.1996 | 1617.342  |
| H,0,3.2814204584,1.6351346629,0.022164936                                          | 1669.0979 | 1737.0292 | 2995.2557 |
| H,0,3.4103061543,0.8855202302,1.5978290192                                         | 3032.1868 | 3041.2531 | 3053.8694 |
| C,0,3.0631998033,-1.5664845214,-0.3609009129                                       | 3062.2221 | 3082.2675 | 3093.0454 |
| H,0,2.4041462857,-2.37376152,-0.6512684756                                         | 3095.4384 | 3100.4872 | 3108.2927 |
| H,0,4.1263406391,-1.7448909834,-0.4559934405                                       | 3136.4771 | 3138.3547 | 3150.2269 |
| O,0,-1.1385893192,1.5873898617,0.8294152847                                        | 3168.0667 | 3194.9864 | 3231.2371 |
| O,0,-1.8414151689,-0.2412676267,-0.9838387782                                      |           |           |           |
| O,0,-1.1588645173,2.0924301785,-0.4446083276                                       |           |           |           |
| UM06-2X/6-311++G(2df,2p): E = -615.893836 Hartree                                  |           |           |           |
| RHF-UCCSD(T)-F12a/cc-pVDZ-F12 // M06-2X/6-311++G(2df,2p): E = -615.1753692 Hartree |           |           |           |
| TS-Syn-2a_SOZ2                                                                     |           |           |           |
| 0,1                                                                                |           |           |           |
| C,0,-0.4463960408,1.3447157643,-0.2643362028                                       | -334.4756 | 61.1574   | 83.8651   |
| C,0,0.8647125126,1.6925956764,0.4415428261                                         | 138.6564  | 155.5222  | 163.7641  |
| C,0,1.7703798702,0.5342065509,0.797677349                                          | 172.6249  | 186.9376  | 195.3848  |

|                                                                                    |           |           |           |
|------------------------------------------------------------------------------------|-----------|-----------|-----------|
| C,0,0.6176013677,-1.8137531848,-0.0163002964                                       | 226.4205  | 260.7097  | 294.3083  |
| C,0,-0.6999725628,-1.2070806566,-0.361492057                                       | 332.2969  | 348.9704  | 387.2342  |
| C,0,-1.1950126955,0.1185814884,0.27392926                                          | 440.0089  | 471.4065  | 507.7013  |
| H,0,1.4146972166,2.4166227681,-0.1586436295                                        | 518.2571  | 526.3688  | 558.9524  |
| H,0,0.6446461494,2.1768894079,1.3997346244                                         | 612.2415  | 684.1275  | 731.2223  |
| H,0,-1.0465554943,0.0452282913,1.3520978458                                        | 779.0971  | 827.8627  | 857.043   |
| H,0,-0.2475863939,1.2020166425,-1.3263913367                                       | 899.3207  | 929.4534  | 943.7424  |
| H,0,0.6760450474,-2.7226416548,0.5738685429                                        | 956.7217  | 984.881   | 987.6964  |
| H,0,-1.4350380543,-1.9844880324,-0.1459645647                                      | 1003.2834 | 1025.5973 | 1028.7038 |
| H,0,-0.665794884,-1.0543652441,-1.4443440569                                       | 1041.0726 | 1071.2275 | 1078.4915 |
| H,0,-1.1050543896,2.2090577163,-0.173569395                                        | 1097.8697 | 1128.4054 | 1197.8519 |
| C,0,3.257326103,0.7698856537,0.7638616142                                          | 1209.5864 | 1232.7905 | 1282.5435 |
| H,0,3.557106756,1.3127624679,-0.1277251467                                         | 1297.0672 | 1327.4784 | 1345.4192 |
| H,0,3.5286626428,1.3588976373,1.6444802444                                         | 1354.8789 | 1387.2121 | 1392.894  |
| H,0,3.7733371208,-0.1854353039,0.8116172949                                        | 1403.9746 | 1413.0598 | 1426.611  |
| C,0,-2.6914634614,0.1735849023,0.0098195118                                        | 1454.4973 | 1462.8681 | 1466.9513 |
| C,0,-3.5441768583,-0.5466069075,1.0155362942                                       | 1471.5825 | 1483.7527 | 1484.4798 |
| H,0,-4.5905113834,-0.5617112791,0.7175965582                                       | 1493.2153 | 1502.4829 | 1602.0611 |
| H,0,-3.2119344978,-1.5780201739,1.1548424448                                       | 1663.7506 | 1738.0162 | 3025.6052 |
| H,0,-3.4669956974,-0.0606171634,1.9905915048                                       | 3033.6684 | 3043.4508 | 3045.8478 |
| C,0,-3.2159421181,0.7852593715,-1.0446502111                                       | 3064.1492 | 3082.3126 | 3086.1547 |
| H,0,-2.6057209568,1.3155076318,-1.7637352978                                       | 3101.7217 | 3110.1599 | 3114.784  |
| H,0,-4.2836935362,0.7775448819,-1.2203442708                                       | 3129.6654 | 3135.7109 | 3149.2881 |
| O,0,1.6699435139,-1.6098868896,-0.6794706384                                       | 3169.8372 | 3200.1951 | 3229.66   |
| O,0,1.7215543839,-0.3472206624,-1.2047674543                                       |           |           |           |
| O,0,1.3203385204,-0.4211718199,1.4468431927                                        |           |           |           |
| UM06-2X/6-311++G(2df,2p): E = -615.889581 Hartree                                  |           |           |           |
| RHF-UCCSD(T)-F12a/cc-pVDZ-F12 // M06-2X/6-311++G(2df,2p): E = -615.1721408 Hartree |           |           |           |
| TS-Syn-2b_SOZ1                                                                     |           |           |           |
| 0,1                                                                                |           |           |           |
| C,0,-0.4057430945,1.3402904184,-0.1006427024                                       | -260.2951 | 49.9359   | 72.7073   |
| C,0,0.9311443497,1.4847361609,0.6476335323                                         | 136.1448  | 153.8574  | 160.3405  |
| C,0,2.167912914,0.7474926961,0.2418006355                                          | 192.3947  | 209.7002  | 225.3388  |
| C,0,0.7015445602,-1.2860707533,-0.9356919307                                       | 230.2014  | 301.9218  | 308.4802  |
| C,0,-0.7719170635,-1.1604360316,-0.6341107476                                      | 337.9391  | 361.8197  | 398.0817  |
| C,0,-1.1927149371,0.0615592084,0.2070900603                                        | 429.604   | 440.4116  | 466.5828  |
| H,0,1.2073404648,2.54040628,0.6186126705                                           | 498.1112  | 561.0122  | 586.5318  |
| H,0,0.7715886175,1.1995281734,1.6923826251                                         | 625.9747  | 667.7141  | 725.6497  |
| H,0,-0.9935456264,-0.1940220465,1.2513365537                                       | 766.6917  | 817.4738  | 869.8628  |
| H,0,-0.244625337,1.464024563,-1.1703327264                                         | 902.5326  | 912.1686  | 949.5337  |
| H,0,1.0993422274,-2.3083037097,-0.9525696379                                       | 965.6559  | 984.7867  | 995.3338  |
| H,0,-1.1062988522,-2.0759506803,-0.1473753669                                      | 1015.5154 | 1032.6308 | 1054.9184 |
| H,0,-1.2692027747,-1.1086556932,-1.6089274765                                      | 1066.5807 | 1071.4098 | 1078.0894 |
| H,0,-1.006671832,2.1840227941,0.24081469                                           | 1095.2743 | 1150.3186 | 1192.5135 |
| C,0,3.3028679257,1.451209842,-0.404456739                                          | 1229.5722 | 1279.3832 | 1290.2204 |
| H,0,3.6256718915,2.2877731143,0.2167941376                                         | 1320.8382 | 1334.6957 | 1350.4864 |
| H,0,4.1279069721,0.7686613931,-0.5820383704                                        | 1371.391  | 1386.2891 | 1407.0329 |
| H,0,2.9451814073,1.850331467,-1.3537356119                                         | 1413.6433 | 1416.0126 | 1432.2302 |
| C,0,-2.6940007013,0.2333988144,0.0675197041                                        | 1455.4876 | 1458.2974 | 1475.7744 |
| C,0,-3.5221493891,-0.8222980846,0.7477429437                                       | 1476.5564 | 1480.3691 | 1488.3491 |
| H,0,-4.5852415562,-0.6095471567,0.6567318438                                       | 1489.0681 | 1502.5144 | 1605.7872 |
| H,0,-3.3359226232,-1.8078847143,0.3169839913                                       | 1666.1921 | 1732.1519 | 3043.082  |
| H,0,-3.2681729902,-0.8863382432,1.8078301419                                       | 3043.8779 | 3046.479  | 3053.3351 |
| C,0,-3.2642525105,1.2094642894,-0.6298974592                                       | 3059.7209 | 3066.9439 | 3070.0479 |
| H,0,-2.6917980698,1.9709495302,-1.1413117759                                       | 3099.9969 | 3105.1272 | 3115.3316 |
| H,0,-4.3410756401,1.2700829981,-0.7194971191                                       | 3127.307  | 3129.1147 | 3134.4329 |
| O,0,2.4415316301,-0.3933803209,0.7143317613                                        | 3150.0319 | 3183.053  | 3229.1594 |

|                                                                                    |           |           |           |
|------------------------------------------------------------------------------------|-----------|-----------|-----------|
| O,0,1.3314705235,-0.3844676047,-1.4965426672                                       |           |           |           |
| O,0,1.3310399238,-1.1266305439,1.0379307002                                        |           |           |           |
| UM06-2X/6-311++G(2df,2p): E = -615.8949978 Hartree                                 |           |           |           |
| RHF-UCCSD(T)-F12a/cc-pVDZ-F12 // M06-2X/6-311++G(2df,2p): E = -615.1762558 Hartree |           |           |           |
| TS-Syn-2b_SOZ2                                                                     |           |           |           |
| 0,1                                                                                |           |           |           |
| C,0,-0.161405534,-1.437679361,0.0575879062                                         | -232.0614 | 60.8604   | 70.1968   |
| C,0,1.3156742075,-1.3002173082,-0.3202801074                                       | 144.5444  | 156.7553  | 159.228   |
| C,0,2.3786244046,-0.7095968442,0.5464006672                                        | 182.0148  | 210.4585  | 221.4348  |
| C,0,0.5599352602,1.173050232,1.5239444251                                          | 240.4731  | 285.7637  | 299.956   |
| C,0,-0.8469119314,0.69196168,1.2886430146                                          | 343.7449  | 376.2196  | 388.3237  |
| C,0,-0.9880761154,-0.145294498,0.0125121363                                        | 429.0573  | 441.2107  | 465.6779  |
| H,0,1.7113622433,-2.3110227481,-0.5008719399                                       | 503.6793  | 534.599   | 558.1743  |
| H,0,1.4052098921,-0.7851070954,-1.2795745503                                       | 650.8605  | 690.2353  | 729.1375  |
| H,0,-0.6126516349,0.4650045075,-0.8159162239                                       | 761.3737  | 793.0579  | 847.0335  |
| H,0,-0.2593025017,-1.923878948,1.0249674437                                        | 900.2274  | 925.1881  | 948.0579  |
| H,0,0.7313822892,1.6958927089,2.4731983475                                         | 962.2961  | 977.1055  | 987.9375  |
| H,0,-1.4786403694,1.5838266475,1.2243210871                                        | 1009.2079 | 1025.7012 | 1048.6556 |
| H,0,-1.1876768591,0.12415388,2.1556665607                                          | 1069.037  | 1073.2056 | 1084.6013 |
| H,0,-0.5777402367,-2.1141632995,-0.691837504                                       | 1109.5459 | 1140.1345 | 1195.1613 |
| C,0,3.7016106496,-0.4322286789,-0.0763056813                                       | 1231.92   | 1245.7488 | 1287.9867 |
| H,0,4.4653422074,-0.310776914,0.6859452594                                         | 1308.9993 | 1323.2537 | 1357.198  |
| H,0,3.9766537328,-1.2218337375,-0.7739297487                                       | 1383.404  | 1391.7823 | 1402.8827 |
| H,0,3.6001537257,0.500977782,-0.632132416                                          | 1415.8035 | 1419.6051 | 1439.0586 |
| C,0,-2.4624024258,-0.3979821316,-0.2372398883                                      | 1449.2994 | 1454.3451 | 1463.1534 |
| C,0,-3.205237078,0.7331055546,-0.8916804063                                        | 1469.135  | 1484.4112 | 1488.0007 |
| H,0,-4.2702897195,0.5223129503,-0.9631692889                                       | 1492.7046 | 1499.3885 | 1616.9128 |
| H,0,-3.0760988312,1.666446076,-0.3406576142                                        | 1664.5667 | 1734.0585 | 3005.3359 |
| H,0,-2.8179112585,0.9062044806,-1.8982952378                                       | 3034.4327 | 3039.041  | 3045.3756 |
| C,0,-3.0762765596,-1.5226059005,0.1118848123                                       | 3058.6361 | 3064.3389 | 3070.4976 |
| H,0,-2.5505968645,-2.3465700988,0.5756009089                                       | 3087.2246 | 3098.1442 | 3101.5576 |
| H,0,-4.1377694353,-1.6528010298,-0.0539506696                                      | 3134.5642 | 3136.0507 | 3140.3661 |
| O,0,1.1532345535,-0.5879405048,2.4044345376                                        | 3147.216  | 3173.4683 | 3226.9664 |
| O,0,2.3839685966,-0.6422679152,1.8057978319                                        |           |           |           |
| O,0,1.3625790924,1.3122187141,0.5952836581                                         |           |           |           |
| UM06-2X/6-311++G(2df,2p): E = -615.8983847 Hartree                                 |           |           |           |
| RHF-UCCSD(T)-F12a/cc-pVDZ-F12 // M06-2X/6-311++G(2df,2p): E = -615.1786413 Hartree |           |           |           |
| TS-Anti-2b_SOZ1                                                                    |           |           |           |
| 0,1                                                                                |           |           |           |
| C,0,0.3684192772,-1.3335579862,0.2310305101                                        | -351.5682 | 52.1689   | 67.6838   |
| C,0,0.0337440076,-2.012663609,1.5799296599                                         | 151.2935  | 171.0367  | 178.4161  |
| C,0,-0.4016021883,-1.0279099204,2.6149992389                                       | 188.7662  | 208.7463  | 235.0911  |
| C,0,-0.5521770158,1.3603943689,1.4683049707                                        | 260.5097  | 297.745   | 304.6087  |
| C,0,0.7392687086,1.2556022548,0.6875649168                                         | 325.8648  | 340.0731  | 378.7221  |
| C,0,1.3393050766,-0.136886217,0.3104740416                                         | 428.6468  | 443.9625  | 471.8304  |
| H,0,-0.7354930146,-2.7696624548,1.4389627298                                       | 507.002   | 555.7417  | 560.1892  |
| H,0,0.930184679,-2.5104736201,1.9593102937                                         | 615.1959  | 707.3942  | 729.3412  |
| H,0,2.0785294658,-0.3745025191,1.079216794                                         | 780.7394  | 812.3474  | 842.2876  |
| H,0,-0.5575665204,-1.0483578119,-0.2623943794                                      | 877.0235  | 912.6228  | 938.6795  |
| H,0,-0.8151867616,2.3724622994,1.7987200936                                        | 950.3266  | 956.6722  | 979.4295  |
| H,0,1.4918467232,1.8585846689,1.1930679041                                         | 1011.2599 | 1015.298  | 1028.3604 |
| H,0,0.4954737427,1.7811356354,-0.2451376489                                        | 1045.0096 | 1053.3036 | 1072.6507 |
| H,0,0.8439445891,-2.1019044936,-0.3786307906                                       | 1091.3706 | 1140.8258 | 1185.9712 |
| C,0,-1.6528213013,-1.1333268151,3.40062848                                         | 1229.4951 | 1265.3022 | 1274.9941 |
| H,0,-2.4903049643,-1.3518292831,2.7453852008                                       | 1306.171  | 1328.1262 | 1334.6941 |
| H,0,-1.5165126561,-1.9754661357,4.0880491402                                       | 1359.121  | 1372.9664 | 1388.8608 |
| H,0,-1.8293715005,-0.2212639886,3.9582468947                                       | 1409.1517 | 1413.8047 | 1423.8361 |

|                                                                                    |           |           |           |
|------------------------------------------------------------------------------------|-----------|-----------|-----------|
| C,0,2.1181636852,0.0607983359,-0.9805108873                                        | 1449.1538 | 1452.0589 | 1456.7633 |
| C,0,3.3670491292,0.8883988274,-0.8466556422                                        | 1479.3235 | 1486.8148 | 1488.4086 |
| H,0,3.8897244411,0.9718680755,-1.7972164461                                        | 1494.2368 | 1502.1756 | 1574.3098 |
| H,0,3.1375148351,1.8958169943,-0.4947097523                                        | 1682.4356 | 1730.635  | 3010.6445 |
| H,0,4.0440461128,0.4437866799,-0.1140552563                                        | 3040.7427 | 3042.4182 | 3060.6078 |
| C,0,1.7291752316,-0.4118451973,-2.1589636218                                       | 3061.8113 | 3073.5988 | 3075.0458 |
| H,0,0.8301378625,-0.9994182148,-2.2830880369                                       | 3098.8095 | 3111.2558 | 3125.2297 |
| H,0,2.3064032525,-0.2123335403,-3.0523279324                                       | 3135.9868 | 3139.7369 | 3152.6757 |
| O,0,0.1818333053,0.9959974999,3.4164075532                                         | 3156.5402 | 3217.1098 | 3236.9869 |
| O,0,0.5530588987,-0.2554308134,2.9463460715                                        |           |           |           |
| O,0,-1.4121621909,0.48415795,1.4048841104                                          |           |           |           |
| UM06-2X/6-311++G(2df,2p): E = -615.8816608 Hartree                                 |           |           |           |
| RHF-UCCSD(T)-F12a/cc-pVDZ-F12 // M06-2X/6-311++G(2df,2p): E = -615.1626 Hartree    |           |           |           |
| TS-Anti-2b_SOZ2                                                                    |           |           |           |
| 0,1                                                                                |           |           |           |
| C,0,0.433023548,-1.2845775118,0.1298972264                                         | -379.2203 | 57.2001   | 79.9304   |
| C,0,-0.7655466578,-1.3479177944,1.0842495155                                       | 166.5535  | 186.629   | 202.7316  |
| C,0,-1.7975221212,-0.3155449533,0.7654414517                                       | 210.3923  | 219.8714  | 240.5141  |
| C,0,-0.5289061178,1.9252194514,0.2631742695                                        | 261.3221  | 288.526   | 305.7779  |
| C,0,0.5445473381,1.2454844366,-0.5669000226                                        | 339.719   | 352.4983  | 375.8343  |
| C,0,1.2245093481,0.0394783608,0.1304677349                                         | 423.1984  | 475.0605  | 487.6533  |
| H,0,-1.2286365749,-2.339175213,1.050398703                                         | 520.4758  | 548.6319  | 555.4509  |
| H,0,-0.4588071636,-1.1783898043,2.1171897295                                       | 617.1604  | 675.8662  | 735.0461  |
| H,0,1.379570208,0.3267334775,1.1751519153                                          | 776.7021  | 811.1171  | 840.8433  |
| H,0,0.0950915682,-1.5130996336,-0.8811338405                                       | 873.8176  | 919.6853  | 934.2401  |
| H,0,-0.8034867502,2.9500240864,-0.0046071113                                       | 951.9703  | 958.2488  | 985.2242  |
| H,0,1.3003724516,2.0136216252,-0.7566379867                                        | 1002.9794 | 1021.3659 | 1031.2555 |
| H,0,0.150040859,0.9642687812,-1.5427498936                                         | 1038.9937 | 1058.4465 | 1072.5326 |
| H,0,1.1215197729,-2.0800504179,0.4170168233                                        | 1103.3145 | 1124.0828 | 1189.0651 |
| C,0,-2.9158882398,0.0368868325,1.6729345632                                        | 1214.1771 | 1248.7184 | 1269.6669 |
| H,0,-3.6216955112,-0.7996254455,1.6465117775                                       | 1296.0617 | 1321.31   | 1345.3053 |
| H,0,-2.5523818227,0.1587466177,2.6883060935                                        | 1364.5792 | 1374.4417 | 1393.9217 |
| H,0,-3.4038918853,0.942308237,1.3317073182                                         | 1410.8404 | 1415.5815 | 1420.4438 |
| C,0,2.5978181878,-0.1300355565,-0.4970813342                                       | 1445.4012 | 1454.9598 | 1459.5653 |
| C,0,3.6685741861,0.7605290992,0.068156668                                          | 1462.7919 | 1487.1501 | 1488.5566 |
| H,0,4.597484017,0.6770868284,-0.4923447928                                         | 1492.5778 | 1498.6412 | 1566.2492 |
| H,0,3.3575695478,1.8072174737,0.0661045115                                         | 1660.2839 | 1736.6196 | 3040.997  |
| H,0,3.8656377354,0.4953949416,1.1093057697                                         | 3045.6395 | 3049.9403 | 3051.1804 |
| C,0,2.8489563729,-0.9789969368,-1.4863969899                                       | 3057.7685 | 3068.8821 | 3095.1161 |
| H,0,2.0893863098,-1.6331680858,-1.8925090093                                       | 3101.9468 | 3113.7207 | 3116.607  |
| H,0,3.8351653281,-1.0442965034,-1.9267719178                                       | 3121.4961 | 3140.3552 | 3153.0739 |
| O,0,-2.2360010886,1.274713387,-0.7636801792                                        | 3158.7571 | 3206.1894 | 3240.9166 |
| O,0,-1.7996394389,-0.0078272368,-0.4703091663                                      |           |           |           |
| O,0,-0.7947738969,1.4783450169,1.3825934134                                        |           |           |           |
| UM06-2X/6-311++G(2df,2p): E = -615.8871396 Hartree                                 |           |           |           |
| RHF-UCCSD(T)-F12a/cc-pVDZ-F12 // M06-2X/6-311++G(2df,2p): E = -615.1681034 Hartree |           |           |           |
| SOZ1                                                                               |           |           |           |
| 0,1                                                                                |           |           |           |
| C,0,0.256049809,-1.3030735366,0.4951537133                                         | 57.2876   | 94.3891   | 144.9905  |
| C,0,-1.0957990113,-0.9960515476,1.1455330063                                       | 170.709   | 180.2523  | 215.0518  |
| C,0,-1.852125642,0.1452911082,0.4802731165                                         | 236.3157  | 252.9499  | 275.864   |
| C,0,-0.6884326854,1.1622189705,-1.1557298497                                       | 303.5431  | 368.0676  | 383.2465  |
| C,0,0.7390683871,0.6505415014,-1.0733449361                                        | 408.3501  | 429.8372  | 450.5775  |
| C,0,1.1513058595,-0.0836036309,0.2206167076                                        | 513.1753  | 548.264   | 610.6092  |
| H,0,-1.7191439544,-1.8915500738,1.1242882505                                       | 639.89    | 646.797   | 726.7471  |
| H,0,-0.9639949052,-0.7238136727,2.1953402675                                       | 800.5202  | 817.4591  | 848.2661  |
| H,0,1.0577943056,0.6166887333,1.053857314                                          | 874.1462  | 890.2116  | 910.0549  |

|                                                                                    |           |           |           |
|------------------------------------------------------------------------------------|-----------|-----------|-----------|
| H,0,0.0837323278,-1.8354861745,-0.4427221444                                       | 926.7692  | 947.2923  | 949.0292  |
| H,0,-0.8877265077,1.6111265028,-2.1293172545                                       | 969.4967  | 996.7461  | 1006.0603 |
| H,0,1.3975611475,1.5025125224,-1.2523070749                                        | 1029.3192 | 1046.7932 | 1058.5601 |
| H,0,0.8762989395,-0.0410543759,-1.9091634452                                       | 1072.0719 | 1086.9032 | 1118.7489 |
| H,0,0.7921974946,-1.9899343686,1.1507047792                                        | 1145.8774 | 1183.175  | 1204.5451 |
| C,0,-3.3352587338,0.1710231049,0.7619331039                                        | 1215.164  | 1251.1459 | 1265.2788 |
| H,0,-3.5116718195,0.1250092231,1.8357125687                                        | 1291.6761 | 1308.1353 | 1316.7399 |
| H,0,-3.7563057776,1.0926784849,0.3653065742                                        | 1351.477  | 1372.9609 | 1376.0605 |
| H,0,-3.8171534274,-0.6805421569,0.284044771                                        | 1394.6212 | 1403.2765 | 1414.8303 |
| C,0,2.6218531277,-0.4376652385,0.0909136953                                        | 1416.5413 | 1420.0959 | 1456.3268 |
| C,0,3.578345402,0.6687435916,0.4369859937                                          | 1472.4786 | 1482.731  | 1486.9249 |
| H,0,4.6093794784,0.3824062461,0.2400194375                                         | 1490.3277 | 1492.9088 | 1497.3595 |
| H,0,3.3586788516,1.5760098532,-0.1292295053                                        | 1509.6712 | 1733.5108 | 3043.3461 |
| H,0,3.4855449779,0.9289883026,1.4935923884                                         | 3048.742  | 3052.6086 | 3057.6491 |
| C,0,3.0490605531,-1.6252736182,-0.3212194828                                       | 3061.0666 | 3074.6223 | 3094.568  |
| H,0,2.3683956017,-2.431311359,-0.5603754735                                        | 3098.1466 | 3102.268  | 3107.5346 |
| H,0,4.1058795515,-1.8298860049,-0.431871086                                        | 3134.1482 | 3135.7806 | 3140.9312 |
| O,0,-1.2267518525,1.3569383485,0.9587613457                                        | 3151.0465 | 3151.4902 | 3231.8526 |
| O,0,-1.6459963595,0.1629714172,-0.9170415376                                       |           |           |           |
| O,0,-1.0060767082,2.1481818371,-0.2007048232                                       |           |           |           |
| UM06-2X/6-311++G(2df,2p): E = -615.9650853 Hartree                                 |           |           |           |
| RHF-UCCSD(T)-F12a/cc-pVDZ-F12 // M06-2X/6-311++G(2df,2p): E = -615.2395947 Hartree |           |           |           |
| SOZ2                                                                               |           |           |           |
| 0,1                                                                                |           |           |           |
| C,0,-0.1495358248,-1.4427778404,-0.0763848487                                      | 35.8261   | 72.1276   | 174.1254  |
| C,0,1.3201005891,-1.2445155992,-0.4642259672                                       | 180.4756  | 193.265   | 213.7538  |
| C,0,2.1744901061,-0.3351564954,0.4136768518                                        | 229.378   | 243.0664  | 263.4604  |
| C,0,0.6785665556,0.8004316972,1.656930995                                          | 294.0322  | 348.4414  | 386.913   |
| C,0,-0.770715933,0.6940449082,1.2296462738                                         | 412.0959  | 430.7639  | 440.6754  |
| C,0,-0.9778848566,-0.1497291874,-0.0464704845                                      | 506.6972  | 555.0811  | 604.6004  |
| H,0,1.8166268879,-2.2159828978,-0.5057502917                                       | 629.6099  | 679.6419  | 717.7653  |
| H,0,1.3593375194,-0.8237088765,-1.4727638169                                       | 758.343   | 819.0817  | 838.2508  |
| H,0,-0.6442960978,0.4665571613,-0.8891093262                                       | 878.2095  | 896.5782  | 903.9793  |
| H,0,-0.2238874103,-1.9695085749,0.8749207825                                       | 921.8896  | 949.4392  | 954.7557  |
| H,0,0.8544470621,1.6310587534,2.3441680685                                         | 974.9288  | 992.6836  | 1010.0061 |
| H,0,-1.1588832099,1.7013706339,1.0759548869                                        | 1024.4781 | 1053.2613 | 1061.5092 |
| H,0,-1.3276933399,0.253552785,2.0606622086                                         | 1071.8439 | 1094.6841 | 1137.9793 |
| H,0,-0.581342319,-2.0957585734,-0.8362779078                                       | 1147.6092 | 1194.2949 | 1197.1594 |
| C,0,3.5785061065,-0.1586665331,-0.1122287291                                       | 1238.086  | 1242.517  | 1264.4597 |
| H,0,3.5397368775,0.2877875963,-1.1036118787                                        | 1290.5724 | 1306.1183 | 1330.7572 |
| H,0,4.1343786719,0.4941913989,0.5559014429                                         | 1354.9115 | 1369.2609 | 1373.8647 |
| H,0,4.0771731737,-1.1238387847,-0.1780918307                                       | 1405.8627 | 1413.9501 | 1419.5555 |
| C,0,-2.4674811512,-0.3751134307,-0.2242495534                                      | 1421.1331 | 1428.6288 | 1457.88   |
| C,0,-3.2679097163,0.8442730825,-0.5932185963                                       | 1473.4868 | 1480.5978 | 1492.3452 |
| H,0,-4.3092975411,0.5896408561,-0.778494564                                        | 1492.8806 | 1498.1999 | 1499.8795 |
| H,0,-3.2413746459,1.5920233006,0.2015879206                                        | 1505.6532 | 1733.4019 | 3026.9757 |
| H,0,-2.8604996012,1.3170903143,-1.489461559                                        | 3045.5173 | 3047.9501 | 3058.5552 |
| C,0,-3.054511243,-1.5516176125,-0.0381263179                                       | 3063.6692 | 3081.2222 | 3102.6606 |
| H,0,-2.5009148285,-2.4382131937,0.2375446514                                       | 3103.8344 | 3105.9888 | 3115.187  |
| H,0,-4.1252350974,-1.6605634992,-0.1515765242                                      | 3126.7069 | 3142.7775 | 3155.6617 |
| O,0,1.0229301412,-0.4367468598,2.2955396164                                        | 3162.2646 | 3172.3877 | 3236.9777 |
| O,0,2.2786728491,-0.8016631322,1.7458345612                                        |           |           |           |
| O,0,1.568640936,0.933388073,0.5809946468                                           |           |           |           |
| UM06-2X/6-311++G(2df,2p): E = -615.9644064 Hartree                                 |           |           |           |
| RHF-UCCSD(T)-F12a/cc-pVDZ-F12 // M06-2X/6-311++G(2df,2p): E = -615.2389387 Hartree |           |           |           |
| TS-Syn-2b_Dioxirane2                                                               |           |           |           |
| 0,1                                                                                |           |           |           |

|                                                                                    |           |           |           |
|------------------------------------------------------------------------------------|-----------|-----------|-----------|
| C,0,-0.0233523426,-0.6199250717,0.0611007573                                       | -482.7934 | 37.2107   | 63.4115   |
| C,0,-1.0600920732,0.4756727275,0.2804322124                                        | 67.3727   | 107.9382  | 118.7843  |
| C,0,-2.4705634667,0.0054385767,0.1942353034                                        | 128.8659  | 161.7124  | 180.1153  |
| C,0,1.4333435697,2.3649296109,-0.1895564391                                        | 200.2547  | 213.8545  | 251.1733  |
| C,0,1.7418846204,1.009020292,-0.7617992786                                         | 266.4622  | 309.6527  | 333.5183  |
| C,0,1.4140795746,-0.1309497295,0.2373591539                                        | 353.2976  | 403.7014  | 431.7136  |
| H,0,-0.9189065049,1.0099244551,1.2242006308                                        | 460.3311  | 511.9687  | 553.4953  |
| H,0,-0.9902507726,1.2504447674,-0.4965390775                                       | 593.7133  | 663.3719  | 722.8343  |
| H,0,1.5116348833,0.2798277979,1.2518091229                                         | 736.9365  | 763.2233  | 794.261   |
| H,0,-0.1569295011,-1.0243035683,-0.9425212241                                      | 850.5705  | 879.1255  | 917.2802  |
| H,0,2.0096419919,2.6214390385,0.7231852732                                         | 952.3864  | 964.0982  | 975.6298  |
| H,0,2.8115400849,1.003955945,-0.9853126501                                         | 995.5517  | 1016.5603 | 1026.9376 |
| H,0,1.201231102,0.8690799812,-1.6983448926                                         | 1044.0804 | 1068.4095 | 1073.9661 |
| H,0,-0.2065212376,-1.4426040435,0.7539440008                                       | 1112.9661 | 1137.2038 | 1193.7256 |
| C,0,-3.5525704551,0.8750957376,0.7311765545                                        | 1211.0676 | 1237.3813 | 1274.4187 |
| H,0,-3.2798672227,1.1761587253,1.746076584                                         | 1292.2082 | 1322.4088 | 1347.0021 |
| H,0,-3.6297988119,1.7825562311,0.1315906751                                        | 1375.883  | 1391.6778 | 1409.2071 |
| H,0,-4.5018172058,0.353628651,0.7031395534                                         | 1415.0223 | 1425.5155 | 1432.1803 |
| C,0,2.4440514014,-1.238465905,0.128119424                                          | 1443.581  | 1451.2145 | 1456.4295 |
| C,0,3.7737010055,-0.9298226081,0.7577608423                                        | 1459.4504 | 1480.759  | 1489.0951 |
| H,0,4.4909671992,-1.7288904874,0.5844982782                                        | 1494.611  | 1501.1383 | 1580.2487 |
| H,0,4.2004212645,-0.0009733496,0.372978937                                         | 1738.8173 | 1838.6917 | 2977.1474 |
| H,0,3.6580371362,-0.7990442196,1.8363369879                                        | 3032.9162 | 3040.5899 | 3044.4364 |
| C,0,2.2070528586,-2.4022053326,-0.4638475441                                       | 3045.4945 | 3052.6012 | 3067.947  |
| H,0,1.249156843,-2.6544017794,-0.8959654155                                        | 3078.4929 | 3083.7283 | 3098.4755 |
| H,0,2.981551655,-3.1550215544,-0.5278234711                                        | 3122.9464 | 3127.4537 | 3143.0367 |
| O,0,-3.6385014552,-0.6867823485,-1.261656635                                       | 3155.5135 | 3180.5187 | 3237.8836 |
| O,0,-2.6711710132,-1.1645158799,-0.2545062232                                      |           |           |           |
| O,0,0.6330186824,3.1399101004,-0.6332504399                                        |           |           |           |
| UM06-2X/6-311++G(2df,2p): E = -615.8633022 Hartree                                 |           |           |           |
| RHF-UCCSD(T)-F12a/cc-pVDZ-F12 // M06-2X/6-311++G(2df,2p): E = -615.1454411 Hartree |           |           |           |
| TS-Anti-2b_Dioxirane2                                                              |           |           |           |
| 0,1                                                                                |           |           |           |
| C,0,0.008547468,-0.6205350276,-0.007570002                                         | -520.1978 | 62.5134   | 64.911    |
| C,0,-1.0375203701,0.4679981773,0.2024516705                                        | 88.7499   | 116.9164  | 133.4563  |
| C,0,-2.4432996245,-0.0030011913,0.0613031387                                       | 157.5719  | 175.214   | 214.0447  |
| C,0,1.4645653431,2.3719154966,-0.1469605714                                        | 226.0644  | 242.186   | 247.4842  |
| C,0,1.7946735974,1.0294006087,-0.7384264097                                        | 268.4491  | 311.8212  | 347.0751  |
| C,0,1.4383680072,-0.1327052619,0.2248295729                                        | 379.3514  | 393.2729  | 435.9187  |
| H,0,-0.9277499611,0.9818422421,1.1616028612                                        | 464.3204  | 513.6075  | 552.2448  |
| H,0,-0.9451205732,1.2596426915,-0.5549094662                                       | 592.3595  | 669.4976  | 724.2331  |
| H,0,1.5026170773,0.2560646402,1.2505458496                                         | 733.9343  | 771.3727  | 804.5951  |
| H,0,-0.0920643931,-1.0032181265,-1.0234698923                                      | 872.8848  | 879.5108  | 915.2765  |
| H,0,2.0109565945,2.6096004624,0.7889756628                                         | 948.5761  | 955.7609  | 974.6547  |
| H,0,2.8708869713,1.0312935753,-0.9279198718                                        | 989.6211  | 996.9741  | 1023.0024 |
| H,0,1.2843548208,0.9088444247,-1.694485073                                         | 1043.051  | 1068.5297 | 1074.0388 |
| H,0,-0.1943247849,-1.4584656836,0.6610842682                                       | 1114.6528 | 1136.0336 | 1195.0229 |
| C,0,-3.5440856792,0.8526122142,0.5824019969                                        | 1211.0158 | 1226.8999 | 1266.0366 |
| H,0,-3.3044982482,1.1319807695,1.61176066                                          | 1290.1983 | 1313.9722 | 1346.8549 |
| H,0,-3.6046615976,1.7727927119,0.0005509229                                        | 1379.2474 | 1393.3546 | 1413.6876 |
| H,0,-4.490583511,0.3300285642,0.5128933804                                         | 1418.1034 | 1423.8968 | 1426.1035 |
| C,0,2.4742134836,-1.2355618574,0.1243374987                                        | 1428.4267 | 1449.8162 | 1450.8594 |
| C,0,3.7824063835,-0.9381073937,0.8024445816                                        | 1456.4165 | 1471.809  | 1487.873  |
| H,0,4.5069186626,-1.7318064331,0.6347425479                                        | 1495.7992 | 1502.515  | 1591.1096 |
| H,0,4.2186534768,-0.0002632438,0.4516667436                                        | 1735.2179 | 1825.6252 | 3019.7527 |
| H,0,3.6322525647,-0.8310824042,1.8793879634                                        | 3030.5021 | 3036.174  | 3044.4448 |
| C,0,2.2591872302,-2.3865904072,-0.4999858223                                       | 3049.1467 | 3053.4282 | 3069.6907 |

|                                                                                    |           |           |           |
|------------------------------------------------------------------------------------|-----------|-----------|-----------|
| H,0,1.3161467924,-2.6311868004,-0.9676833556                                       | 3090.3061 | 3101.6348 | 3104.7511 |
| H,0,3.0373153012,-3.1363173989,-0.5556608984                                       | 3117.1026 | 3119.4384 | 3137.1844 |
| O,0,-3.5626523559,-0.6655713058,-1.445654642                                       | 3155.5971 | 3184.3169 | 3236.8492 |
| O,0,-2.6264796794,-1.163274797,-0.4189223373                                       |           |           |           |
| O,0,0.6766656638,3.1548167436,-0.5989104775                                        |           |           |           |
| UM06-2X/6-311++G(2df,2p): E = -615.8721786 Hartree                                 |           |           |           |
| RHF-UCCSD(T)-F12a/cc-pVDZ-F12 // M06-2X/6-311++G(2df,2p): E = -615.152717 Hartree  |           |           |           |
| Dioxirane2                                                                         |           |           |           |
| 0,1                                                                                |           |           |           |
| Redundant internal coordinates found in file.                                      |           |           |           |
| C,0,-0.059539249,-0.6717121698,-0.2802045567                                       | 34.6953   | 43.0259   | 69.7986   |
| C,0,1.0686797055,0.3471976337,-0.4432557262                                        | 77.5102   | 89.1594   | 96.5467   |
| C,0,1.1831008077,1.0406161936,-1.7763762613                                        | 152.1349  | 168.3309  | 189.9229  |
| C,0,-1.3234093426,2.3799195527,-0.1595494552                                       | 199.7848  | 224.806   | 264.4504  |
| C,0,-1.6782512058,1.1014821617,0.5512671782                                        | 316.3118  | 335.9493  | 396.3843  |
| C,0,-1.4946998775,-0.1396141412,-0.3583357495                                      | 413.189   | 430.593   | 457.3388  |
| H,0,1.0170458019,1.1231877321,0.3228696268                                         | 494.9425  | 523.1591  | 570.5972  |
| H,0,2.0204498957,-0.1661978372,-0.2839496825                                       | 581.1984  | 727.7044  | 758.8391  |
| H,0,-1.6903522402,0.1735569219,-1.3864814115                                       | 794.0902  | 795.8987  | 874.6976  |
| H,0,0.0854523211,-1.1212824996,0.7040205791                                        | 884.4058  | 941.8401  | 950.5031  |
| H,0,-1.9615151693,2.6152305138,-1.0328670129                                       | 964.8171  | 981.6071  | 992.9134  |
| H,0,-2.7283062207,1.1915612536,0.840459923                                         | 1021.0408 | 1022.6981 | 1057.6743 |
| H,0,-1.0855473475,1.0069411654,1.4620026275                                        | 1063.1855 | 1076.9643 | 1102.9891 |
| H,0,0.0566808671,-1.4710208359,-1.0128547144                                       | 1125.5627 | 1151.7635 | 1206.1248 |
| C,0,2.3343848145,1.9861880258,-1.9401544                                           | 1221.5098 | 1243.2061 | 1277.3292 |
| H,0,2.2294057386,2.7997926295,-1.222135118                                         | 1290.7636 | 1315.5873 | 1341.4956 |
| H,0,3.277315209,1.4743220918,-1.7512075458                                         | 1361.2106 | 1398.8214 | 1415.8512 |
| H,0,2.3299954115,2.3887721885,-2.9494408385                                        | 1418.3245 | 1426.982  | 1429.2583 |
| C,0,-2.5437473428,-1.1856878821,-0.0301403233                                      | 1456.2036 | 1458.4508 | 1461.1795 |
| C,0,-3.9114364646,-0.8867612555,-0.5800658404                                      | 1480.4719 | 1489.8114 | 1493.2378 |
| H,0,-4.6478761586,-1.610507622,-0.2379254922                                       | 1498.0966 | 1505.9672 | 1513.815  |
| H,0,-4.2529207697,0.1101645084,-0.2935800879                                       | 1738.6469 | 1863.462  | 2950.7031 |
| H,0,-3.8865591869,-0.9071050055,-1.6718475898                                      | 3006.4914 | 3039.8949 | 3040.0841 |
| C,0,-2.3103058406,-2.292515519,0.6649607712                                        | 3047.9249 | 3067.1079 | 3070.7501 |
| H,0,-1.3332895976,-2.5539494699,1.0440224481                                       | 3090.8717 | 3095.2796 | 3114.7334 |
| H,0,-3.1109253605,-2.991189717,0.8698672102                                        | 3121.3132 | 3133.6612 | 3136.7495 |
| O,0,0.8152433537,0.305234206,-2.8977292057                                         | 3158.7058 | 3172.883  | 3243.1019 |
| O,0,0.0112337499,1.429681853,-2.4159786105                                         |           |           |           |
| O,0,-0.4284221225,3.1182904429,0.1524139182                                        |           |           |           |
| UM06-2X/6-311++G(2df,2p): E = -615.9350402 Hartree                                 |           |           |           |
| RHF-UCCSD(T)-F12a/cc-pVDZ-F12 // M06-2X/6-311++G(2df,2p): E = -615.2108321 Hartree |           |           |           |
| Dioxirane1                                                                         |           |           |           |
| 0,1                                                                                |           |           |           |
| C,0,-0.4006174253,-1.4967620855,-0.3561215971                                      | 61.467    | 66.9253   | 83.5674   |
| C,0,1.0307108331,-1.4265007599,-0.8774062844                                       | 99.8445   | 114.1166  | 138.9135  |
| C,0,2.0892964492,-1.0518792572,0.1380223496                                        | 148.2939  | 164.5376  | 169.6154  |
| C,0,0.4227314216,1.6559697602,0.8123586684                                         | 212.2156  | 246.318   | 264.0132  |
| C,0,-0.6426151003,0.6326349812,1.0630379074                                        | 312.9834  | 333.0067  | 404.9572  |
| C,0,-1.109197514,-0.1446959778,-0.1878038501                                       | 428.8109  | 466.0436  | 492.1781  |
| H,0,1.3306978969,-2.4082420917,-1.2606672673                                       | 520.4812  | 555.4605  | 613.7529  |
| H,0,1.1132938302,-0.7426243007,-1.7254428364                                       | 628.9381  | 728.5501  | 766.1336  |
| H,0,-0.8789091169,0.4709937511,-1.0639628738                                       | 811.8903  | 852.8558  | 854.2158  |
| H,0,-0.4053228864,-2.0392873325,0.5917223071                                       | 905.5178  | 927.1725  | 945.5537  |
| H,0,0.8978102049,2.0855315643,1.691705742                                          | 950.6037  | 972.4187  | 991.715   |
| H,0,-1.4755697743,1.1837813261,1.5082180692                                        | 1004.1016 | 1024.2722 | 1048.0559 |
| H,0,-0.284039377,-0.0611220794,1.8223470969                                        | 1073.6899 | 1076.5986 | 1101.6684 |
| H,0,-0.9821420735,-2.0876820926,-1.0645904493                                      | 1128.8557 | 1173.4833 | 1197.7201 |

|                                                                                    |            |           |           |
|------------------------------------------------------------------------------------|------------|-----------|-----------|
| C,0,3.453368328,-0.7292162622,-0.416619217                                         | 1223.169   | 1254.7626 | 1275.1536 |
| H,0,4.1858919025,-0.7005203838,0.3846927364                                        | 1301.0386  | 1322.8516 | 1342.8227 |
| H,0,3.7465721923,-1.4534097608,-1.176854704                                        | 1349.7816  | 1386.6877 | 1400.587  |
| H,0,3.4025537024,0.2494946029,-0.8974250748                                        | 1410.6502  | 1416.5708 | 1417.3835 |
| C,0,-2.6197152855,-0.2716994815,-0.1279538214                                      | 1453.6688  | 1455.5523 | 1472.3178 |
| C,0,-3.3646192637,0.9661222064,-0.5413292921                                       | 1473.3396  | 1485.6322 | 1487.4074 |
| H,0,-4.4326233382,0.8753511338,-0.3546541618                                       | 1490.4608  | 1492.8057 | 1501.4769 |
| H,0,-2.9915220371,1.8477879599,-0.0154616685                                       | 1742.6627  | 1833.1682 | 3037.8874 |
| H,0,-3.2111650631,1.1554505883,-1.6061235576                                       | 3041.0478  | 3042.1994 | 3055.4012 |
| C,0,-3.2494502569,-1.3690418739,0.2734818467                                       | 3057.9586  | 3058.9769 | 3092.4888 |
| H,0,-2.720263998,-2.268741818,0.5561279331                                         | 3096.0357  | 3105.789  | 3122.8875 |
| H,0,-4.329821118,-1.4000192743,0.3293658064                                        | 3125.168   | 3143.3425 | 3151.3029 |
| O,0,1.2676485168,1.5266998292,-0.2766922807                                        | 3155.5451  | 3177.9362 | 3233.2494 |
| O,0,1.8637258905,-1.0200613456,1.3237476442                                        |            |           |           |
| O,0,0.2276166901,2.5522023639,-0.228219211                                         |            |           |           |
| UM06-2X/6-311++G(2df,2p): E = -615.9389641 Hartree                                 |            |           |           |
| RHF-UCCSD(T)-F12a/cc-pVDZ-F12 // M06-2X/6-311++G(2df,2p): E = -615.213447 Hartree  |            |           |           |
| TS-Syn-2b-H-Shift                                                                  |            |           |           |
| 0,1                                                                                |            |           |           |
| C,0,-0.1923015381,-1.3224072452,-0.4321233483                                      | -1552.5099 | 25.2869   | 56.4886   |
| C,0,1.1595804551,-0.9196874441,-0.9890555316                                       | 59.9468    | 83.3078   | 90.3711   |
| C,0,2.3282685193,-0.9938307992,-0.1930703251                                       | 116.1825   | 140.9182  | 176.0696  |
| C,0,0.6119831171,1.4450484401,0.7758431485                                         | 192.0571   | 234.8262  | 249.949   |
| C,0,-0.7088502607,0.7435733409,0.9461819742                                        | 289.0512   | 326.6055  | 341.8285  |
| C,0,-1.1379362595,-0.1248243845,-0.2537894762                                      | 344.1761   | 413.3744  | 484.6982  |
| H,0,1.3519934644,-1.2559413634,-2.0101503556                                       | 493.8566   | 508.1231  | 553.144   |
| H,0,1.6246897038,0.2250667625,-1.4353947971                                        | 572.8103   | 608.5818  | 707.198   |
| H,0,-1.067232216,0.4924759143,-1.1571813163                                        | 726.5186   | 775.0624  | 806.6832  |
| H,0,-0.083761833,-1.8326749692,0.5289456366                                        | 850.5458   | 896.2662  | 916.2591  |
| H,0,0.7078477994,2.0884027983,-0.1193539475                                        | 951.2041   | 962.3985  | 982.3529  |
| H,0,-1.4506841983,1.5339170224,1.0990613833                                        | 993.7942   | 1023.7055 | 1033.74   |
| H,0,-0.6740474618,0.1391754717,1.8541615326                                        | 1061.2397  | 1065.1819 | 1076.5818 |
| H,0,-0.6658626834,-2.0365336963,-1.1053241871                                      | 1104.1741  | 1127.7313 | 1142.5732 |
| C,0,2.5164373646,-1.6301672693,1.1335208398                                        | 1198.9434  | 1243.509  | 1272.0519 |
| H,0,2.1938703276,-2.6695700165,1.1149632694                                        | 1291.1061  | 1301.9823 | 1329.7334 |
| H,0,3.5587139889,-1.5590392291,1.4330737664                                        | 1357.544   | 1387.797  | 1399.8824 |
| H,0,1.9130890517,-1.0859950235,1.8637558436                                        | 1410.8823  | 1418.4523 | 1423.1744 |
| C,0,-2.5937617255,-0.508250833,-0.0799171656                                       | 1451.4034  | 1458.4631 | 1468.176  |
| C,0,-3.5879472444,0.5523605832,-0.4612161064                                       | 1473.6636  | 1491.4646 | 1497.4143 |
| H,0,-4.6063842668,0.2429975327,-0.236411252                                        | 1500.262   | 1507.4595 | 1573.9854 |
| H,0,-3.3937992988,1.4914289382,0.0606448667                                        | 1737.2698  | 1846.661  | 1895.6148 |
| H,0,-3.5191230247,0.7660336085,-1.5301846722                                       | 2987.1883  | 3019.6784 | 3045.0421 |
| C,0,-2.9785463326,-1.6905301843,0.3854835308                                       | 3046.9416  | 3051.827  | 3055.026  |
| H,0,-2.2732027807,-2.4676581348,0.6459347495                                       | 3087.2254  | 3100.9519 | 3102.9721 |
| H,0,-4.0273469612,-1.9200918927,0.5201314615                                       | 3118.0967  | 3124.9985 | 3146.8155 |
| O,0,2.9549371661,0.4806981809,-1.7058492225                                        | 3155.3593  | 3161.8043 | 3235.5741 |
| O,0,3.3057797911,-0.2533818732,-0.5821573169                                       |            |           |           |
| O,0,1.5185424465,1.3595131546,1.5604491275                                         |            |           |           |
| UM06-2X/6-311++G(2df,2p): E = -615.8757229 Hartree                                 |            |           |           |
| RHF-UCCSD(T)-F12a/cc-pVDZ-F12 // M06-2X/6-311++G(2df,2p): E = -615.1552784 Hartree |            |           |           |
| TS-Anti-2b-H-Shift                                                                 |            |           |           |
| 0,1                                                                                |            |           |           |
| C,0,0.4916984537,-1.3606712048,0.2765415789                                        | -1598.5987 | 52.3349   | 60.9086   |
| C,0,-0.8519944559,-1.363005117,1.011849181                                         | 78.4369    | 94.9594   | 120.0889  |
| C,0,-2.0185875501,-0.7898998838,0.2843734005                                       | 152.2857   | 159.0138  | 182.6135  |
| C,0,-0.4648861715,1.8219118476,-0.0523662809                                       | 200.1336   | 238.5915  | 262.9214  |
| C,0,0.683936664,1.0435063937,-0.6301211625                                         | 283.2872   | 316.5416  | 356.3151  |



|                                                                                    |           |           |           |
|------------------------------------------------------------------------------------|-----------|-----------|-----------|
| C,0,1.2738681874,-0.0385146885,0.2891465495                                        | 435.2776  | 482.7509  | 522.4058  |
| H,0,-1.1255469456,-2.3895308654,1.2721998848                                       | 539.9124  | 552.385   | 566.6658  |
| H,0,-0.7874692983,-0.8191842986,1.9574555228                                       | 647.6965  | 682.88    | 708.2546  |
| H,0,1.2430589392,0.3572302135,1.3099273271                                         | 730.8614  | 741.9831  | 810.9879  |
| H,0,0.3434261748,-1.6976838368,-0.7510296578                                       | 849.4835  | 899.9892  | 921.0416  |
| H,0,-0.9459464863,2.5370281566,-0.742232728                                        | 932.3154  | 949.7539  | 958.7958  |
| H,0,1.4426524968,1.7921690426,-0.8848263728                                        | 988.3958  | 1003.4193 | 1020.2293 |
| H,0,0.3650850481,0.6199442334,-1.5857960756                                        | 1033.3018 | 1057.4633 | 1069.7466 |
| H,0,1.1185234833,-2.1102874546,0.7602433457                                        | 1074.2139 | 1114.5243 | 1136.3623 |
| C,0,-3.2423636292,-0.351887633,0.8144756824                                        | 1200.6662 | 1230.6354 | 1274.3664 |
| H,0,-3.2916816477,-0.251071109,1.8887031634                                        | 1283.1206 | 1308.0592 | 1325.1585 |
| H,0,-3.259924476,0.5275035101,-0.1792442623                                        | 1348.2385 | 1354.625  | 1387.9296 |
| H,0,-4.1302797474,-0.7783898705,0.3516094622                                       | 1412.258  | 1416.5077 | 1421.8632 |
| C,0,2.7348455447,-0.2268162899,-0.0777424008                                       | 1426.0783 | 1448.0219 | 1454.8175 |
| C,0,3.6675714783,0.803050059,0.4960173553                                          | 1461.3227 | 1488.2652 | 1491.9434 |
| H,0,4.6768226786,0.6909874756,0.1056478528                                         | 1497.9867 | 1520.1184 | 1566.7342 |
| H,0,3.3261502963,1.8173899587,0.2791761542                                         | 1737.5215 | 1847.7747 | 1884.6162 |
| H,0,3.7033718541,0.7119569877,1.5838345647                                         | 3012.8275 | 3034.5295 | 3036.6008 |
| C,0,3.1747560806,-1.2071089985,-0.8573172866                                       | 3044.7025 | 3053.3354 | 3061.6283 |
| H,0,2.5186933442,-1.9641251968,-1.2641785919                                       | 3092.7614 | 3093.6997 | 3096.9224 |
| H,0,4.2228180927,-1.2818399352,-1.1157402073                                       | 3107.0039 | 3112.4598 | 3142.9359 |
| O,0,-2.8618138371,0.2747806673,-1.4565444189                                       | 3154.3206 | 3228.4244 | 3235.2529 |
| O,0,-1.8153304008,-0.5009584574,-0.9589366572                                      |           |           |           |
| O,0,-0.8510219311,1.7173565641,1.0819915673                                        |           |           |           |
| UM06-2X/6-311++G(2df,2p): E = -615.877845 Hartree                                  |           |           |           |
| RHF-UCCSD(T)-F12a/cc-pVDZ-F12 // M06-2X/6-311++G(2df,2p): E = -615.1556657 Hartree |           |           |           |
| VHP3                                                                               |           |           |           |
| 0,1                                                                                |           |           |           |
| C,0,0.029741528,-1.8831787058,-0.1319273463                                        | 36.4282   | 46.0105   | 55.6021   |
| C,0,1.4389417719,-1.6995994879,-0.6866946179                                       | 77.4659   | 81.1371   | 122.0346  |
| C,0,2.3465290243,-0.771805236,0.1011823008                                         | 145.2278  | 179.0976  | 193.0882  |
| C,0,0.331425569,1.4543906664,-0.5728649571                                         | 208.2571  | 216.1838  | 254.1466  |
| C,0,-0.3234584708,0.5421085311,0.1254688905                                        | 295.527   | 329.4797  | 339.0328  |
| C,0,-0.8989077735,-0.7067465276,-0.4824181187                                      | 432.3598  | 451.9022  | 473.3408  |
| H,0,1.9643897851,-2.6607541486,-0.7105678777                                       | 511.5957  | 540.4936  | 559.2866  |
| H,0,1.4110414874,-1.3530542449,-1.7238483452                                       | 613.1556  | 707.5972  | 728.8716  |
| H,0,-0.8964682956,-0.5902966031,-1.5741193513                                      | 756.875   | 804.0165  | 853.248   |
| H,0,0.0896495092,-1.9917478338,0.9526456741                                        | 882.7208  | 917.3393  | 920.9983  |
| H,0,0.3704399367,1.4764886058,-1.6566477781                                        | 947.9366  | 961.1572  | 971.0804  |
| H,0,1.7490603868,1.6052687233,1.4717362694                                         | 997.7752  | 1012.0477 | 1027.2443 |
| H,0,-0.3190251164,0.5873936119,1.2064332903                                        | 1055.7131 | 1076.8041 | 1086.2119 |
| H,0,-0.3966476571,-2.8041982888,-0.5317581276                                      | 1102.5228 | 1134.1837 | 1197.6655 |
| C,0,3.4679173712,-0.1317376106,-0.6747292488                                       | 1220.6237 | 1234.8991 | 1269.2553 |
| H,0,3.039771768,0.6519584962,-1.3050973854                                         | 1282.0583 | 1312.8882 | 1345.1004 |
| H,0,4.1931625509,0.311096798,0.0019130811                                          | 1364.2075 | 1388.8934 | 1406.2582 |
| H,0,3.9496822002,-0.8539710661,-1.3341874191                                       | 1409.1266 | 1420.2707 | 1422.5003 |
| C,0,-2.3411420958,-0.9021907891,-0.0587579054                                      | 1450.3112 | 1454.5488 | 1461.1947 |
| C,0,-3.2838515703,0.1598361032,-0.549775962                                        | 1471.8902 | 1485.0184 | 1491.0795 |
| H,0,-4.3049609751,-0.0380563602,-0.2312438745                                      | 1499.5546 | 1507.3785 | 1650.9397 |
| H,0,-2.9845241897,1.1414964095,-0.1787341783                                       | 1733.0707 | 1826.4168 | 3026.3366 |
| H,0,-3.264345731,0.2149037299,-1.6408650021                                        | 3031.5573 | 3050.6217 | 3052.5354 |
| C,0,-2.7560235404,-1.9119512186,0.6965234181                                       | 3059.0233 | 3070.2846 | 3082.4736 |
| H,0,-2.089402409,-2.6797851612,1.0621446306                                        | 3107.8097 | 3113.2716 | 3116.1897 |
| H,0,-3.797276581,-1.9963212747,0.979254326                                         | 3120.2449 | 3142.3989 | 3154.8132 |
| O,0,1.212514238,2.4031440739,1.3201029311                                          | 3179.2977 | 3221.0773 | 3237.0632 |
| O,0,2.1954365163,-0.5561006955,1.280806949                                         |           |           |           |
| O,0,1.1184427029,2.4580075232,-0.0864776653                                        |           |           |           |

| UM06-2X/6-311++G(2df,2p): E = -615.9398142 Hartree                                 |           |           |           |
|------------------------------------------------------------------------------------|-----------|-----------|-----------|
| RHF-UCCSD(T)-F12a/cc-pVDZ-F12 // M06-2X/6-311++G(2df,2p): E = -615.2137096 Hartree |           |           |           |
| VHP2                                                                               |           |           |           |
| 0,1                                                                                |           |           |           |
| C,0,0.4983487953,-1.3232011786,0.2132408271                                        | 25.1422   | 43.3685   | 67.9963   |
| C,0,-0.8938790857,-1.0112066621,0.675257925                                        | 87.4017   | 118.6166  | 121.1379  |
| C,0,-1.927314929,-0.787995259,-0.1310614408                                        | 145.3685  | 153.4467  | 180.133   |
| C,0,-0.3149675657,1.7497129641,0.0069097216                                        | 189.7588  | 223.0075  | 257.6658  |
| C,0,0.9001510078,1.0505007595,-0.5478269279                                        | 270.6928  | 311.3962  | 335.7838  |
| C,0,1.4206623245,-0.0993522424,0.3316166378                                        | 363.6112  | 386.8393  | 464.3319  |
| H,0,-1.0480954314,-0.8975398146,1.7393995976                                       | 475.4139  | 496.1205  | 519.3145  |
| H,0,-3.2327376369,0.8622878653,1.6518248337                                        | 535.8178  | 579.6648  | 637.0746  |
| H,0,1.3836224876,0.246446801,1.3731778626                                          | 718.5641  | 754.9213  | 828.0834  |
| H,0,0.497597144,-1.6642589058,-0.8216600368                                        | 868.7242  | 912.8024  | 914.1108  |
| H,0,-0.3274852306,1.8538482919,1.1110545015                                        | 956.6116  | 960.5095  | 978.3361  |
| H,0,1.6643911459,1.8304047857,-0.6299470471                                        | 996.0649  | 1023.0001 | 1058.4684 |
| H,0,0.6869355663,0.7069061387,-1.5618160823                                        | 1065.3921 | 1070.8076 | 1077.2216 |
| H,0,0.9181158711,-2.1336459483,0.8122851136                                        | 1084.6389 | 1123.2439 | 1142.4621 |
| C,0,-1.9751643385,-0.8393772184,-1.6223660603                                      | 1187.6968 | 1228.2398 | 1259.564  |
| H,0,-1.1476470955,-1.409144407,-2.0321615772                                       | 1282.8596 | 1291.8164 | 1315.8323 |
| H,0,-2.9106825756,-1.2941105871,-1.9457722797                                      | 1359.4517 | 1371.6037 | 1401.7613 |
| H,0,-1.9412198396,0.1808826984,-2.0128191056                                       | 1417.3054 | 1424.3296 | 1431.4118 |
| C,0,2.8745228942,-0.3865666417,0.0167451778                                        | 1435.1106 | 1449.8033 | 1454.1347 |
| C,0,3.8619922555,0.5900300688,0.5934910784                                         | 1480.7012 | 1482.999  | 1491.0362 |
| H,0,4.8779267511,0.3612251923,0.2785480964                                         | 1496.2321 | 1505.2474 | 1735.6404 |
| H,0,3.6369139253,1.6160048011,0.2959508012                                         | 1764.5103 | 1847.2746 | 2952.5072 |
| H,0,3.8247303889,0.5629485839,1.6848794178                                         | 3012.4545 | 3043.3391 | 3049.1634 |
| C,0,3.2719594045,-1.4237161996,-0.7106661938                                       | 3054.8229 | 3065.2598 | 3096.5026 |
| H,0,2.5809680688,-2.151048343,-1.1124215212                                        | 3110.6594 | 3112.9976 | 3117.649  |
| H,0,4.3211221736,-1.580396608,-0.9245907403                                        | 3145.4545 | 3161.1019 | 3171.9994 |
| O,0,-3.2055093159,-0.1029140396,1.6703567204                                       | 3210.5241 | 3242.528  | 3818.1094 |
| O,0,-3.1732986104,-0.3951687423,0.2914000727                                       |           |           |           |
| O,0,-1.1920026096,2.2319140465,-0.6577147924                                       |           |           |           |
| UM06-2X/6-311++G(2df,2p): E = -615.9328296 Hartree                                 |           |           |           |
| RHF-UCCSD(T)-F12a/cc-pVDZ-F12 // M06-2X/6-311++G(2df,2p): E = -615.2074544 Hartree |           |           |           |
| VHP1                                                                               |           |           |           |
| 0,1                                                                                |           |           |           |
| C,0,-0.5491046231,-1.5129538941,-0.3561144602                                      | 47.4467   | 52.1099   | 66.5651   |
| C,0,0.8639387392,-1.5328303844,-0.9618151603                                       | 93.364    | 123.4858  | 148.108   |
| C,0,1.9602273584,-1.010188581,-0.0754915534                                        | 170.1079  | 174.0784  | 198.297   |
| C,0,0.5001196195,1.734078888,-0.4301615615                                         | 200.2835  | 206.233   | 245.1502  |
| C,0,-0.434370016,0.9047845107,0.413530651                                          | 294.3165  | 338.3188  | 344.5981  |
| C,0,-1.2358398276,-0.1478786412,-0.3721709651                                      | 379.5069  | 435.0563  | 470.9289  |
| H,0,1.1146171982,-2.5688703222,-1.202433311                                        | 505.335   | 552.0504  | 557.5558  |
| H,0,0.8908337928,-0.9668728125,-1.8933068151                                       | 639.7374  | 666.4037  | 719.4825  |
| H,0,-1.2642795624,0.1992933177,-1.4104006809                                       | 748.4224  | 767.6057  | 825.775   |
| H,0,-0.5023314097,-1.8956926992,0.6642662077                                       | 863.9151  | 887.0831  | 903.6752  |
| H,0,1.2224984681,2.3473780445,0.1394572604                                         | 916.8712  | 952.9496  | 959.3415  |
| H,0,-1.095895493,1.628192687,0.902945406                                           | 981.6417  | 993.9136  | 1010.2944 |
| H,0,0.1377839063,0.4467613491,1.2253321094                                         | 1033.7915 | 1066.6715 | 1068.873  |
| H,0,-1.1680380779,-2.2093061702,-0.9235389466                                      | 1078.4738 | 1107.7094 | 1136.5865 |
| C,0,2.8992021502,-0.1383870087,-0.416919405                                        | 1193.8852 | 1240.4438 | 1273.0116 |
| H,0,2.8699190575,0.2876932572,-1.4073078562                                        | 1281.2902 | 1300.9075 | 1314.0874 |
| H,0,3.5457398345,-1.8235207084,1.9347514054                                        | 1355.9655 | 1370.6126 | 1386.9408 |
| H,0,3.6715291309,0.1742265821,0.266047529                                          | 1412.4762 | 1417.3192 | 1419.6675 |
| C,0,-2.6690347519,-0.1851826026,0.1166591686                                       | 1431.8337 | 1445.7685 | 1458.41   |
| C,0,-3.5134861886,0.971733442,-0.3416913866                                        | 1463.919  | 1487.9848 | 1490.2661 |

|                                                                                    |            |           |           |
|------------------------------------------------------------------------------------|------------|-----------|-----------|
| H <sub>0</sub> , -4.4988635544, 0.9579297132, 0.1192279246                         | 1494.3322  | 1501.6509 | 1738.7932 |
| H <sub>0</sub> , -3.0399210468, 1.9290216889, -0.1139367815                        | 1739.6676  | 1848.7688 | 2987.8871 |
| H <sub>0</sub> , -3.635624465, 0.9375180645, -1.4264253601                         | 3036.3923  | 3042.8624 | 3045.3956 |
| C <sub>0</sub> , -3.1691454908, -1.1490021141, 0.880933469                         | 3058.1742  | 3065.3439 | 3081.46   |
| H <sub>0</sub> , -2.5861738888, -2.0009932637, 1.2007424926                        | 3090.2803  | 3104.1761 | 3118.0992 |
| H <sub>0</sub> , -4.1987933007, -1.1121658213, 1.2122348978                        | 3135.2975  | 3159.7714 | 3194.9596 |
| O <sub>0</sub> , 2.8457540618, -1.1683360816, 2.0509777697                         | 3245.9001  | 3290.875  | 3810.5038 |
| O <sub>0</sub> , 1.8625140509, -1.621232474, 1.1509810897                          |            |           |           |
| O <sub>0</sub> , 0.4700445684, 1.7895877643, -1.6295435372                         |            |           |           |
| UM06-2X/6-311++G(2df,2p): E = -615.9291012 Hartree                                 |            |           |           |
| RHF-UCCSD(T)-F12a/cc-pVDZ-F12 // M06-2X/6-311++G(2df,2p): E = -615.2030062 Hartree |            |           |           |
| TS-SOZ1-decomposition                                                              |            |           |           |
| 0,1                                                                                |            |           |           |
| C <sub>0</sub> , -0.4464747395, 1.4393469446, -0.1006997551                        | -1420.1345 | 63.284    | 88.7017   |
| C <sub>0</sub> , 0.9501637798, 1.6068455969, 0.515101521                           | 134.9857   | 157.3285  | 163.25    |
| C <sub>0</sub> , 1.8607838181, 0.3795744617, 0.4943998222                          | 196.5372   | 234.9438  | 249.7319  |
| C <sub>0</sub> , 0.7676098564, -1.2036112125, -0.8205473274                        | 270.1541   | 292.7103  | 301.9732  |
| C <sub>0</sub> , -0.7279528568, -0.9902930459, -0.8463363527                       | 347.9417   | 399.5217  | 421.4094  |
| C <sub>0</sub> , -1.1603796681, 0.1024017897, 0.1672193507                         | 426.3664   | 458.4251  | 484.4244  |
| H <sub>0</sub> , 1.459135189, 2.4285033629, 0.0102448584                           | 513.3377   | 547.8493  | 601.4067  |
| H <sub>0</sub> , 0.8605311298, 1.882895869, 1.5678514939                           | 628.2681   | 682.6278  | 734.1178  |
| H <sub>0</sub> , -0.8939134495, -0.2504728326, 1.1652486978                        | 771.8176   | 804.5658  | 847.6974  |
| H <sub>0</sub> , -0.3734556573, 1.5891858217, -1.1794049859                        | 886.6233   | 924.3581  | 934.2553  |
| H <sub>0</sub> , 1.0857612023, -2.3243157585, -1.2396561115                        | 943.6399   | 955.7555  | 961.9905  |
| H <sub>0</sub> , -1.2303421169, -1.9332820544, -0.6359497279                       | 992.5451   | 1005.7234 | 1020.8233 |
| H <sub>0</sub> , -1.0095276359, -0.6596959742, -1.847183998                        | 1036.0327  | 1048.2588 | 1072.6859 |
| H <sub>0</sub> , -1.0725591366, 2.2444016712, 0.2846162836                         | 1092.1819  | 1114.5632 | 1171.3807 |
| C <sub>0</sub> , 3.3426586162, 0.6314499868, 0.3832882294                          | 1209.937   | 1235.8323 | 1272.1611 |
| H <sub>0</sub> , 3.6697458865, 1.1654558259, 1.2771359177                          | 1283.3048  | 1297.9583 | 1341.7553 |
| H <sub>0</sub> , 3.8610179092, -0.3231058428, 0.3344264949                         | 1351.9735  | 1363.778  | 1374.9951 |
| H <sub>0</sub> , 3.578185159, 1.2277546673, -0.4952178239                          | 1392.048   | 1415.5326 | 1417.9954 |
| C <sub>0</sub> , -2.6727109471, 0.196501579, 0.0916559808                          | 1423.9345  | 1455.2284 | 1470.0015 |
| C <sub>0</sub> , -3.4173812908, -0.8194426183, 0.911141657                         | 1475.3602  | 1482.9263 | 1485.0827 |
| H <sub>0</sub> , -4.4912175803, -0.7545618228, 0.7486792348                        | 1487.8216  | 1495.4498 | 1499.8843 |
| H <sub>0</sub> , -3.0944324806, -1.8353416345, 0.6744506237                        | 1508.8787  | 1736.9258 | 2274.0303 |
| H <sub>0</sub> , -3.215559872, -0.667112373, 1.9735419536                          | 3045.0821  | 3056.7141 | 3058.9918 |
| C <sub>0</sub> , -3.3052070067, 1.0894019536, -0.6602531496                        | 3061.3131  | 3069.662  | 3084.606  |
| H <sub>0</sub> , -2.7748908778, 1.8298280563, -1.2443999589                        | 3099.2051  | 3101.7782 | 3112.7187 |
| H <sub>0</sub> , -4.3858041593, 1.1085288461, -0.7123451482                        | 3128.5285  | 3135.2964 | 3139.1961 |
| O <sub>0</sub> , 1.4868306745, -0.5645032118, 1.3060013489                         | 3149.8824  | 3160.2695 | 3230.1867 |
| O <sub>0</sub> , 1.5363118429, -0.2119179306, -1.1207883149                        |            |           |           |
| O <sub>0</sub> , 1.2889383114, -1.9866401207, 0.1185764955                         |            |           |           |
| UM06-2X/6-311++G(2df,2p): E = -615.8863058 Hartree                                 |            |           |           |
| RHF-UCCSD(T)-F12a/cc-pVDZ-F12 // M06-2X/6-311++G(2df,2p): E = -615.174165 Hartree  |            |           |           |
| TS-SOZ2-decomposition                                                              |            |           |           |
| 0,1                                                                                |            |           |           |
| C <sub>0</sub> , -0.4363571516, 1.3650316114, -0.226932467                         | -1389.5867 | 62.7182   | 84.4819   |
| C <sub>0</sub> , 0.9228534319, 1.6072524611, 0.428300987                           | 126.769    | 186.033   | 193.0698  |
| C <sub>0</sub> , 1.9583923329, 0.5328475106, 0.1255690043                          | 202.3521   | 215.8573  | 232.6909  |
| C <sub>0</sub> , 0.7277721865, -1.452599549, 0.1328081893                          | 262.583    | 293.7706  | 319.0487  |
| C <sub>0</sub> , -0.7296090401, -1.1895746305, -0.2220016165                       | 352.1604   | 401.6878  | 413.5718  |
| C <sub>0</sub> , -1.2276172128, 0.1665806302, 0.3219138832                         | 440.2549   | 466.2285  | 496.2996  |
| H <sub>0</sub> , 1.3357382172, 2.5467208791, 0.0501984746                          | 515.635    | 556.2731  | 594.6792  |
| H <sub>0</sub> , 0.8235849529, 1.7116923935, 1.5095376497                          | 629.1941   | 688.6433  | 694.2415  |
| H <sub>0</sub> , -1.0972421648, 0.1423644972, 1.4081629826                         | 744.5226   | 797.9904  | 852.0752  |
| H <sub>0</sub> , -0.2918426598, 1.252642333, -1.3033208823                         | 887.572    | 910.3353  | 928.624   |
| H <sub>0</sub> , 1.0212102565, -2.6445913573, 0.0529879283                         | 950.7133   | 953.1086  | 958.1756  |

|                                                                                    |           |           |           |
|------------------------------------------------------------------------------------|-----------|-----------|-----------|
| H,0,-1.3488899148,-1.9939478578,0.1765846119                                       | 990.1353  | 1004.914  | 1021.7613 |
| H,0,-0.8159927251,-1.2157916577,-1.3091528108                                      | 1040.5186 | 1055.9634 | 1074.9977 |
| H,0,-1.0403452489,2.2607750666,-0.0774355006                                       | 1096.7111 | 1129.3298 | 1173.5263 |
| C,0,3.2954657137,0.6539829023,0.8070856218                                         | 1219.6045 | 1223.8026 | 1270.1845 |
| H,0,3.1804566371,0.8026307927,1.8784730865                                         | 1276.0682 | 1312.3983 | 1332.1383 |
| H,0,3.8724032344,-0.2479789767,0.6186783316                                        | 1346.9972 | 1371.5709 | 1379.2592 |
| H,0,3.8248553513,1.5070335487,0.3802905616                                         | 1396.7837 | 1409.1134 | 1417.886  |
| C,0,-2.7160205764,0.2496199747,0.0399583712                                        | 1428.7391 | 1456.7755 | 1462.7302 |
| C,0,-3.5969314766,-0.4797327866,1.0156306862                                       | 1476.2887 | 1477.1633 | 1485.6894 |
| H,0,-4.6411469455,-0.4477943294,0.7114834166                                       | 1488.062  | 1490.2078 | 1498.8586 |
| H,0,-3.3026303695,-1.5264040633,1.1166581488                                       | 1511.0551 | 1736.6093 | 2291.2357 |
| H,0,-3.5102322667,-0.0322925344,2.008236044                                        | 3044.5406 | 3046.8289 | 3055.5617 |
| C,0,-3.2195681587,0.9010886055,-1.0014683358                                       | 3059.4764 | 3066.0522 | 3069.8547 |
| H,0,-2.5947918101,1.4402153891,-1.700642838                                        | 3098.4866 | 3099.7259 | 3112.1507 |
| H,0,-4.285673292,0.9157759231,-1.1862724708                                        | 3121.342  | 3138.181  | 3143.7838 |
| O,0,1.5892008706,-1.6930633434,-0.8538105776                                       | 3152.822  | 3160.865  | 3233.7145 |
| O,0,1.949484678,0.1035529727,-1.0974735105                                         |           |           |           |
| O,0,1.2590346503,-0.7855122354,1.0975066408                                        |           |           |           |
| UM06-2X/6-311++G(2df,2p): E = -615.8882834 Hartree                                 |           |           |           |
| RHF-UCCSD(T)-F12a/cc-pVDZ-F12 // M06-2X/6-311++G(2df,2p): E = -615.1760949 Hartree |           |           |           |
| PRC5                                                                               |           |           |           |
| 0,1                                                                                |           |           |           |
| C,0,-0.9487826191,2.0943201981,0.0044399651                                        | 28.9459   | 42.6562   | 48.5801   |
| C,0,-2.4035956806,1.9599366834,-0.4315294899                                       | 82.6995   | 87.6621   | 126.419   |
| C,0,-3.0249609933,0.6599930265,0.0119239738                                        | 129.8929  | 144.7482  | 171.2253  |
| C,0,-2.2809865031,-0.35329567,0.4447540101                                         | 195.5822  | 215.2581  | 240.7609  |
| C,0,-0.7782110394,-0.3417585344,0.498358445                                        | 266.861   | 312.0043  | 331.2142  |
| C,0,-0.1773474349,0.818355687,-0.3108043809                                        | 357.0241  | 443.8871  | 451.8903  |
| H,0,-2.9953187832,2.7904390429,-0.0369299043                                       | 498.3146  | 532.7294  | 561.8782  |
| H,0,-2.4778634865,2.0344757177,-1.5224858356                                       | 653.3168  | 740.5531  | 784.4738  |
| H,0,-0.3379029896,0.5863662139,-1.3708713813                                       | 797.7952  | 825.1701  | 828.3094  |
| H,0,-0.9107634449,2.2786735263,1.0821347022                                        | 915.3225  | 938.1762  | 939.4797  |
| H,0,-2.7738334852,-1.2624441264,0.7746802328                                       | 960.5026  | 983.0229  | 1009.7033 |
| H,0,-0.4005329936,-1.2960013146,0.1256210063                                       | 1023.1264 | 1042.2737 | 1052.5223 |
| H,0,-0.4384595284,-0.2657795571,1.5378933096                                       | 1065.039  | 1085.7043 | 1112.3544 |
| H,0,-0.4868170001,2.9527139748,-0.4871846007                                       | 1150.8127 | 1176.5149 | 1188.1198 |
| C,0,-4.5207283852,0.586924416,-0.0707883008                                        | 1234.0828 | 1276.8884 | 1285.5696 |
| H,0,-4.8590534312,0.8005505598,-1.0877968727                                       | 1324.547  | 1339.3478 | 1346.0384 |
| H,0,-4.8921133862,-0.3953610315,0.2157310852                                       | 1354.2206 | 1367.2969 | 1380.0997 |
| H,0,-4.9811705712,1.3351704422,0.5784677951                                        | 1408.0586 | 1412.3061 | 1417.1478 |
| C,0,1.3156613018,0.9071366331,-0.0905388681                                        | 1421.8248 | 1454.6311 | 1480.5273 |
| C,0,2.1211971271,-0.2407554061,-0.6315592016                                       | 1482.6481 | 1485.3142 | 1489.2018 |
| H,0,3.1883421022,-0.0392066896,-0.5614793713                                       | 1495.6664 | 1497.0121 | 1502.5816 |
| H,0,1.9098476692,-1.1601212529,-0.0818514311                                       | 1712.0848 | 1761.6838 | 3014.0081 |
| H,0,1.871399824,-0.4228152096,-1.6784594103                                        | 3025.5789 | 3027.2242 | 3033.6987 |
| C,0,1.9015513133,1.90450661,0.5710848015                                           | 3039.1907 | 3045.8929 | 3079.2431 |
| H,0,1.3443837113,2.737078763,0.9796788295                                          | 3082.302  | 3083.9847 | 3088.3047 |
| H,0,2.971271957,1.9083250475,0.733916138                                           | 3106.7303 | 3123.4076 | 3141.4217 |
| O,0,1.8749864978,3.2639441371,-2.2523916278                                        | 3143.5368 | 3156.1544 | 3237.3755 |
| O,0,1.4418713586,2.1667894212,-2.6147300745                                        |           |           |           |
| O,0,2.9812745731,3.2935621915,-1.7135125532                                        |           |           |           |
| UM06-2X/6-311++G(2df,2p): E = -615.7746438 Hartree                                 |           |           |           |
| RHF-UCCSD(T)-F12a/cc-pVDZ-F12 // M06-2X/6-311++G(2df,2p): E = -615.0735988 Hartree |           |           |           |
| PRC6                                                                               |           |           |           |
| 0,1                                                                                |           |           |           |
| C,0,-0.8664512861,2.0626259006,-0.009070499                                        |           | 32.5247   | 49.3974   |
| C,0,-2.3188389464,1.9633956133,-0.462218124                                        | 77.0605   | 88.8374   | 113.524   |

|                                                                                    |           |           |           |
|------------------------------------------------------------------------------------|-----------|-----------|-----------|
| C,0,-2.9839891545,0.6874575937,-0.012354501                                        | 123.9075  | 162.9704  | 176.8035  |
| C,0,-2.2771744801,-0.3414050161,0.4452732322                                       | 189.9387  | 214.6021  | 231.7815  |
| C,0,-0.7755308381,-0.3742001036,0.5199720214                                       | 267.5322  | 312.2864  | 333.9982  |
| C,0,-0.130711427,0.7591988361,-0.2933483678                                        | 358.3159  | 442.4846  | 451.1538  |
| H,0,-2.8917591196,2.8143913316,-0.0839013168                                       | 498.2934  | 532.3739  | 559.1978  |
| H,0,-2.3783143684,2.0283959236,-1.5547180839                                       | 653.417   | 723.761   | 784.1953  |
| H,0,-0.28198383,0.5184882378,-1.3532910616                                         | 798.3286  | 826.9426  | 828.1508  |
| H,0,-0.8387853123,2.2617165678,1.0665672864                                        | 916.8583  | 937.2527  | 940.5065  |
| H,0,-2.8012187131,-1.2315426423,0.7790654097                                       | 946.7568  | 983.3552  | 1008.7221 |
| H,0,-0.4222305175,-1.3431286342,0.1609942107                                       | 1022.2833 | 1044.6685 | 1052.6826 |
| H,0,-0.4473274772,-0.2981198514,1.5633444928                                       | 1061.6091 | 1085.4144 | 1113.664  |
| H,0,-0.3674006874,2.8928420869,-0.5102451509                                       | 1150.043  | 1176.8343 | 1187.1829 |
| C,0,-4.4798057233,0.6553380747,-0.1184218916                                       | 1232.2843 | 1279.6321 | 1285.8454 |
| H,0,-4.7947812895,0.8449661487,-1.1475839882                                       | 1325.9361 | 1339.1523 | 1345.3515 |
| H,0,-4.8855844387,-0.3053064382,0.1940543515                                       | 1352.96   | 1367.229  | 1377.5525 |
| H,0,-4.9279034809,1.4385748314,0.4973814283                                        | 1406.2248 | 1409.6089 | 1418.1692 |
| C,0,1.3600222867,0.8117658719,-0.0579645819                                        | 1421.3355 | 1456.5466 | 1480.3583 |
| C,0,2.1350167059,-0.3901097163,-0.5269887479                                       | 1483.2397 | 1485.1985 | 1490.3424 |
| H,0,3.2082565997,-0.2194318199,-0.4622182447                                       | 1496.3978 | 1498.8112 | 1508.14   |
| H,0,1.8969654023,-1.2663224291,0.0792198014                                        | 1717.0949 | 1761.3398 | 3014.729  |
| H,0,1.8808553572,-0.6358675622,-1.5598371338                                       | 3022.0223 | 3025.9679 | 3032.7923 |
| C,0,1.9673632814,1.8250092855,0.5592646119                                         | 3039.9699 | 3044.5224 | 3071.2775 |
| H,0,1.4290651168,2.6853873524,0.9306680728                                         | 3087.2055 | 3088.7372 | 3099.1629 |
| H,0,3.0374579641,1.8113777638,0.7258372573                                         | 3102.8561 | 3126.1708 | 3133.9729 |
| O,0,2.3449935836,2.9033511674,-2.362069009                                         | 3143.887  | 3149.6746 | 3235.1853 |
| O,0,1.433344586,2.1015420088,-2.5795874473                                         |           |           |           |
| O,0,2.1380495361,3.7945278273,-1.537544017                                         |           |           |           |
| UM06-2X/6-311++G(2df,2p): E = -615.7751026 Hartree                                 |           |           |           |
| RHF-UCCSD(T)-F12a/cc-pVDZ-F12 // M06-2X/6-311++G(2df,2p): E = -615.0738582 Hartree |           |           |           |
| TS5                                                                                |           |           |           |
| 0,1                                                                                |           |           |           |
| C,0,-0.9531200634,2.082140184,-0.1100913496                                        | -314.4925 | 51.0102   | 63.5835   |
| C,0,-2.4177088304,1.9330525687,-0.5055931677                                       | 72.858    | 117.197   | 175.6296  |
| C,0,-3.0317804129,0.6626969664,0.0260967557                                        | 186.6855  | 198.2759  | 206.576   |
| C,0,-2.2816028269,-0.3304574829,0.4947536533                                       | 215.7491  | 227.6505  | 270.1926  |
| C,0,-0.7778526453,-0.3265241135,0.5062479787                                       | 307.238   | 333.9315  | 366.8817  |
| C,0,-0.2016740901,0.7835982509,-0.3863378357                                       | 441.0329  | 450.7668  | 474.0762  |
| H,0,-2.9951377104,2.7866483631,-0.1408517672                                       | 496.1443  | 534.9249  | 568.0435  |
| H,0,-2.5188519371,1.9496401887,-1.5963782216                                       | 656.3522  | 778.9356  | 793.9988  |
| H,0,-0.3971493284,0.4964610289,-1.4244775764                                       | 794.5118  | 816.4067  | 827.3494  |
| H,0,-0.8969754602,2.3097938346,0.9583327203                                        | 908.4192  | 936.2177  | 937.9958  |
| H,0,-2.7696019449,-1.2166118864,0.8879952319                                       | 965.0276  | 980.1347  | 1014.1075 |
| H,0,-0.4125600577,-1.3005803678,0.1730704983                                       | 1017.9678 | 1036.4908 | 1052.4171 |
| H,0,-0.4082395704,-0.1967549222,1.5305645865                                       | 1058.4214 | 1080.4748 | 1108.8933 |
| H,0,-0.4979617048,2.9170221048,-0.6456307003                                       | 1146.8847 | 1177.9716 | 1186.7774 |
| C,0,-4.5295465211,0.5952759446,-0.0109408695                                       | 1211.8739 | 1230.7988 | 1277.7437 |
| H,0,-4.8936224254,0.7357250499,-1.0316954104                                       | 1285.2341 | 1292.8487 | 1322.828  |
| H,0,-4.8991293119,-0.3598512799,0.357768666                                        | 1337.3333 | 1349.1445 | 1368.3424 |
| H,0,-4.9671315773,1.3935151072,0.5927994054                                        | 1405.6709 | 1410.2749 | 1417.8577 |
| C,0,1.2973304376,0.8710669262,-0.2110667823                                        | 1419.1449 | 1440.2218 | 1479.1449 |
| C,0,2.0936508053,-0.3191576592,-0.6629552594                                       | 1480.951  | 1486.4602 | 1488.8923 |
| H,0,3.144696915,-0.0588911416,-0.7723319864                                        | 1492.0492 | 1495.3647 | 1502.2691 |
| H,0,2.0125152428,-1.1296102379,0.0647688767                                        | 1608.9376 | 1757.8147 | 3013.2487 |
| H,0,1.726720788,-0.6915036517,-1.6194512364                                        | 3031.35   | 3034.6241 | 3035.4553 |
| C,0,1.8898023117,1.8281273412,0.5605570897                                         | 3047.222  | 3048.5639 | 3065.8074 |
| H,0,1.3169103668,2.6014854549,1.0508638016                                         | 3067.9479 | 3086.691  | 3110.885  |
| H,0,2.9227063618,1.7225420432,0.8588659664                                         | 3113.7157 | 3129.9741 | 3133.6293 |

|                                                                                                                                                                                                                                                                                                                                                                                                                                                                                                                                                                                                                                                                                                                                                                                                                                                                                                                                                                                                                                                                                                                                                                                                                                                                                                                                                                                                                                         |                                                                                                                                                                                                                                                                                                                                                                                                                                                                                                                                                                                                                                                                                                                                                                                                                                                                                |
|-----------------------------------------------------------------------------------------------------------------------------------------------------------------------------------------------------------------------------------------------------------------------------------------------------------------------------------------------------------------------------------------------------------------------------------------------------------------------------------------------------------------------------------------------------------------------------------------------------------------------------------------------------------------------------------------------------------------------------------------------------------------------------------------------------------------------------------------------------------------------------------------------------------------------------------------------------------------------------------------------------------------------------------------------------------------------------------------------------------------------------------------------------------------------------------------------------------------------------------------------------------------------------------------------------------------------------------------------------------------------------------------------------------------------------------------|--------------------------------------------------------------------------------------------------------------------------------------------------------------------------------------------------------------------------------------------------------------------------------------------------------------------------------------------------------------------------------------------------------------------------------------------------------------------------------------------------------------------------------------------------------------------------------------------------------------------------------------------------------------------------------------------------------------------------------------------------------------------------------------------------------------------------------------------------------------------------------|
| O,0,1.7592880431,3.0924640575,-1.8181808901<br>O,0,1.673903141,1.9011687318,-2.2247715059<br>O,0,2.6645639654,3.2581996365,-0.9628205616                                                                                                                                                                                                                                                                                                                                                                                                                                                                                                                                                                                                                                                                                                                                                                                                                                                                                                                                                                                                                                                                                                                                                                                                                                                                                                | 3142.0837 3173.3202 3265.7363                                                                                                                                                                                                                                                                                                                                                                                                                                                                                                                                                                                                                                                                                                                                                                                                                                                  |
| UM06-2X/6-311++G(2df,2p): E = -615.7684469 Hartree<br>RHF-UCCSD(T)-F12a/cc-pVDZ-F12 // M06-2X/6-311++G(2df,2p): E = -615.0682093 Hartree                                                                                                                                                                                                                                                                                                                                                                                                                                                                                                                                                                                                                                                                                                                                                                                                                                                                                                                                                                                                                                                                                                                                                                                                                                                                                                |                                                                                                                                                                                                                                                                                                                                                                                                                                                                                                                                                                                                                                                                                                                                                                                                                                                                                |
| TS6<br>0,1<br>C,0,-0.9214462307,2.0778949809,-0.0736936225<br>C,0,-2.3838165122,1.9505635888,-0.4841156618<br>C,0,-3.0151240837,0.673073532,0.0100219056<br>C,0,-2.2808852346,-0.3375352593,0.4668797445<br>C,0,-0.7773221142,-0.3463886712,0.5007880063<br>C,0,-0.1841313119,0.7756571968,-0.3634724061<br>H,0,-2.9579690777,2.7999459541,-0.1045160915<br>H,0,-2.475624688,1.9938611753,-1.5750898165<br>H,0,-0.3726427462,0.5104613864,-1.4098926668<br>H,0,-0.8730956114,2.2869133241,0.999170106<br>H,0,-2.7824171959,-1.2285328613,0.8310783571<br>H,0,-0.4136541688,-1.3174106755,0.1561847795<br>H,0,-0.422256777,-0.2374763244,1.5325992611<br>H,0,-0.4405133105,2.9060350318,-0.5960076953<br>C,0,-4.5126377649,0.6180617975,-0.0516286409<br>H,0,-4.8591504232,0.7834916955,-1.0747878316<br>H,0,-4.8958845201,-0.3416057288,0.2905914904<br>H,0,-4.9535285682,1.4069068806,0.5619431717<br>C,0,1.3111953775,0.8509019059,-0.1855103477<br>C,0,2.1027993634,-0.3570208675,-0.6084998467<br>H,0,3.1432693681,-0.0930586009,-0.7974466348<br>H,0,2.0891562147,-1.1139486318,0.1792024686<br>H,0,1.6869358199,-0.8042233069,-1.5104777909<br>C,0,1.9122334006,1.8286068721,0.5513126144<br>H,0,1.3434692661,2.6139792428,1.0243769576<br>H,0,2.9513330763,1.7379092341,0.8370889006<br>O,0,2.6111399715,2.4995428171,-1.9714578738<br>O,0,1.5282121988,1.902153674,-2.2139961745<br>O,0,2.5237375227,3.3100615376,-1.0154538019 | -309.7349 52.6335 58.9587<br>67.8957 120.1244 164.3473<br>180.214 196.6277 205.1139<br>213.7081 218.6295 269.1944<br>304.1592 332.0465 366.8443<br>444.0858 453.0162 477.7794<br>484.1118 532.6949 572.4494<br>657.6159 779.7835 791.8877<br>798.1661 822.6082 830.7037<br>907.2101 936.3919 940.1488<br>966.072 981.634 1012.9291<br>1020.6283 1037.9228 1050.6025<br>1056.7474 1081.4742 1110.9255<br>1148.7914 1179.8266 1187.4048<br>1215.4781 1234.5635 1277.4202<br>1287.5076 1291.2364 1328.222<br>1336.6591 1350.9394 1369.9176<br>1405.2857 1409.8875 1416.8752<br>1423.0693 1437.8568 1480.26<br>1481.2071 1484.8918 1488.3116<br>1492.8571 1494.8278 1504.178<br>1609.6911 1758.9309 3011.9349<br>3027.1371 3032.0409 3036.5973<br>3042.5207 3045.8821 3066.7622<br>3068.3011 3086.9314 3110.2425<br>3113.4386 3125.8404 3134.9285<br>3144.0905 3165.2002 3263.6957 |
| UM06-2X/6-311++G(2df,2p): E = -615.7692612 Hartree<br>RHF-UCCSD(T)-F12a/cc-pVDZ-F12 // M06-2X/6-311++G(2df,2p): E = -615.068763 Hartree                                                                                                                                                                                                                                                                                                                                                                                                                                                                                                                                                                                                                                                                                                                                                                                                                                                                                                                                                                                                                                                                                                                                                                                                                                                                                                 |                                                                                                                                                                                                                                                                                                                                                                                                                                                                                                                                                                                                                                                                                                                                                                                                                                                                                |
| POZ5<br>0,1<br>C,0,-0.9937699397,2.1151838252,-0.488870265<br>C,0,-2.4752988348,1.8488173465,-0.731562516<br>C,0,-2.997622222,0.6909761268,0.0783122202<br>C,0,-2.1756474431,-0.1848639918,0.6480058103<br>C,0,-0.6774188933,-0.1593510409,0.5137792935<br>C,0,-0.2058403973,0.8086535286,-0.5759021933<br>H,0,-3.0605333058,2.7415560755,-0.4963181944<br>H,0,-2.6541784327,1.6489071108,-1.7940659592<br>H,0,-0.4368018442,0.3565546477,-1.547322906<br>H,0,-0.87422272,2.55767254,0.5036196926<br>H,0,-2.595006749,-0.9930856628,1.2383366027<br>H,0,-0.3286316768,-1.1707075936,0.2942562291<br>H,0,-0.2283495088,0.1078464964,1.4790374908<br>H,0,-0.6127900942,2.8357554557,-1.2106313922<br>C,0,-4.4893018341,0.5903374207,0.1951253791<br>H,0,-4.9480885227,0.5468755883,-0.7956273188<br>H,0,-4.7920818144,-0.2937437939,0.7533127645                                                                                                                                                                                                                                                                                                                                                                                                                                                                                                                                                                                          | 60.6752 79.7011 103.5586<br>159.4729 168.8657 193.9992<br>240.6085 251.7646 283.2772<br>294.0111 312.2647 359.3694<br>391.1185 430.6815 448.8274<br>499.8962 517.8988 547.3477<br>605.9569 722.3554 748.9895<br>783.5078 816.6381 821.5798<br>861.8957 903.3069 933.2801<br>938.0119 944.65 980.6979<br>988.3676 1003.6497 1025.8325<br>1041.9208 1051.5007 1076.4578<br>1081.8998 1107.9348 1142.8111<br>1166.7154 1180.4811 1192.6517<br>1203.9411 1243.4966 1266.8962<br>1278.1567 1293.4316 1333.5262<br>1344.2209 1349.2168 1369.2517                                                                                                                                                                                                                                                                                                                                     |

|                                                                                    |           |           |           |
|------------------------------------------------------------------------------------|-----------|-----------|-----------|
| H,0,-4.8978998061,1.4728441411,0.6923879153                                        | 1386.6817 | 1407.2575 | 1412.3424 |
| C,0,1.3161878098,1.0001021441,-0.54992614                                          | 1417.9157 | 1421.0045 | 1481.5032 |
| C,0,2.0733642192,-0.2743788925,-0.8853854856                                       | 1485.2461 | 1488.0294 | 1494.6821 |
| H,0,3.14357699,-0.0724523448,-0.8831006257                                         | 1497.2461 | 1499.0702 | 1500.9786 |
| H,0,1.8598726303,-1.0557737527,-0.1578995132                                       | 1518.4429 | 1765.6908 | 3007.7754 |
| H,0,1.7884124782,-0.634247292,-1.873888536                                         | 3030.4186 | 3032.9692 | 3035.0976 |
| C,0,1.8422576831,1.6645501836,0.7500523873                                         | 3050.0454 | 3059.689  | 3080.5096 |
| H,0,1.0322700449,2.0371373268,1.3774939561                                         | 3083.4125 | 3086.4627 | 3087.9498 |
| H,0,2.495512659,1.0084766116,1.3214638355                                          | 3117.6426 | 3130.3779 | 3137.1716 |
| O,0,1.8949663458,3.1607659996,-0.8374842572                                        | 3145.8259 | 3146.042  | 3147.9684 |
| O,0,1.7153681043,1.9562079631,-1.5475279953                                        |           |           |           |
| O,0,2.6357679245,2.7349959928,0.2801693009                                         |           |           |           |
| UM06-2X/6-311++G(2df,2p): E = -615.8802494 Hartree                                 |           |           |           |
| RHF-UCCSD(T)-F12a/cc-pVDZ-F12 // M06-2X/6-311++G(2df,2p): E = -615.8802494 Hartree |           |           |           |
| POZ6                                                                               |           |           |           |
| 0,1                                                                                |           |           |           |
| C,0,-0.9441724796,2.1064212605,-0.3818069024                                       | 60.1437   | 74.5257   | 101.3249  |
| C,0,-2.4309238184,1.9098278018,-0.6545726095                                       | 165.7599  | 187.6961  | 211.022   |
| C,0,-2.9912133316,0.700449957,0.0488665678                                         | 251.8761  | 273.3641  | 289.097   |
| C,0,-2.1981888925,-0.2421398896,0.5496870487                                       | 298.4562  | 316.5844  | 357.079   |
| C,0,-0.6981805736,-0.2456173692,0.4316140236                                       | 383.9771  | 443.0295  | 453.3563  |
| C,0,-0.1975931278,0.7882315214,-0.5785722893                                       | 476.8332  | 520.5106  | 559.8418  |
| H,0,-2.9913633398,2.7950952627,-0.3431317684                                       | 607.7582  | 704.1308  | 760.1114  |
| H,0,-2.6084370673,1.8100178084,-1.7311981526                                       | 781.3205  | 819.9095  | 827.5531  |
| H,0,-0.4366685115,0.418361108,-1.5828092012                                        | 863.865   | 904.2513  | 933.8478  |
| H,0,-0.8222104413,2.4458041276,0.6509195613                                        | 937.6591  | 947.4943  | 980.2871  |
| H,0,-2.6446403266,-1.0855052929,1.0663344119                                       | 993.8607  | 1014.8731 | 1031.7064 |
| H,0,-0.3682348984,-1.2458491905,0.1431355178                                       | 1040.6777 | 1050.0141 | 1073.4827 |
| H,0,-0.2498103436,-0.0563880324,1.4158725381                                       | 1084.4472 | 1106.4135 | 1135.7138 |
| H,0,-0.5284170445,2.8780931684,-1.0272359473                                       | 1157.5112 | 1179.3698 | 1193.859  |
| C,0,-4.4861528784,0.6302112893,0.144308959                                         | 1201.0354 | 1241.6628 | 1259.8213 |
| H,0,-4.9357211423,0.6825964814,-0.8501453494                                       | 1288.489  | 1312.859  | 1334.6871 |
| H,0,-4.8176207538,-0.2888761892,0.6240618215                                       | 1338.4615 | 1345.841  | 1380.7481 |
| H,0,-4.8765996735,1.4785152906,0.7109034542                                        | 1387.0519 | 1405.6072 | 1409.7945 |
| C,0,1.326031333,0.9420092614,-0.5370096724                                         | 1414.8492 | 1419.2605 | 1482.4984 |
| C,0,2.0709031713,-0.3729847225,-0.6955576814                                       | 1485.8508 | 1487.7215 | 1494.4066 |
| H,0,3.1253998645,-0.1667160361,-0.8754950534                                       | 1496.431  | 1497.4725 | 1501.5537 |
| H,0,1.9881144013,-0.9816294678,0.2054839318                                        | 1520.8648 | 1761.8102 | 3004.1086 |
| H,0,1.6732323084,-0.939673135,-1.5370579105                                        | 3028.6182 | 3030.6807 | 3036.054  |
| C,0,1.862490003,1.7428099758,0.6803842677                                          | 3047.9889 | 3048.5091 | 3072.9328 |
| H,0,1.119674473,1.917562962,1.45468627                                             | 3084.5571 | 3087.3481 | 3087.9286 |
| H,0,2.7456698204,1.2594243108,1.1027324971                                         | 3116.689  | 3124.7083 | 3135.4692 |
| O,0,2.7033055295,2.6199207267,-1.1283854928                                        | 3139.7907 | 3148.8351 | 3162.8272 |
| O,0,1.6597817719,1.8156477846,-1.6277042229                                        |           |           |           |
| O,0,2.2026838283,2.9983736866,0.1322094031                                         |           |           |           |
| UM06-2X/6-311++G(2df,2p): E = -615.8812454 Hartree                                 |           |           |           |
| RHF-UCCSD(T)-F12a/cc-pVDZ-F12 // M06-2X/6-311++G(2df,2p): E = -615.1603711 Hartree |           |           |           |
| TS_POZ5_CH2OO-AMCH                                                                 |           |           |           |
| 0,1                                                                                |           |           |           |
| C,0,0.6502193422,-1.1407175056,-0.1090558588                                       | -556.5698 | 58.4828   | 62.8862   |
| C,0,2.1349971972,-1.2192363431,-0.4484983181                                       | 95.864    | 169.3295  | 177.6831  |
| C,0,2.9135711806,-0.0379905859,0.0721343341                                        | 192.2012  | 213.2341  | 234.121   |
| C,0,2.3078123528,1.0703653211,0.4886822564                                         | 272.1259  | 279.7112  | 302.3879  |
| C,0,0.8183776969,1.2919870015,0.4518007333                                         | 318.7759  | 350.7608  | 418.0778  |
| C,0,0.1210674441,0.253527268,-0.4264349462                                         | 455.6286  | 485.4049  | 518.4197  |
| H,0,2.5671902095,-2.137626369,-0.0428211385                                        | 522.0081  | 558.8692  | 570.7474  |
| H,0,2.2708416943,-1.2823139839,-1.5338556854                                       | 631.5257  | 666.7471  | 778.9012  |

|                                                                                    |           |           |           |
|------------------------------------------------------------------------------------|-----------|-----------|-----------|
| H,0,0.4061682153,0.4749201039,-1.4634670384                                        | 799.6697  | 820.7236  | 866.4081  |
| H,0,0.5312976289,-1.3514985229,0.9583812212                                        | 917.8907  | 935.3968  | 939.2054  |
| H,0,2.9109129509,1.8864418706,0.873113723                                          | 971.4336  | 985.4702  | 1014.6856 |
| H,0,0.6194971873,2.3002754756,0.0823536803                                         | 1041.4764 | 1051.8027 | 1074.2026 |
| H,0,0.4291657543,1.2628964332,1.4765894441                                         | 1095.4444 | 1115.1352 | 1146.1323 |
| H,0,0.0789280101,-1.8912433362,-0.6512729405                                       | 1157.9425 | 1174.41   | 1183.8129 |
| C,0,4.4054799203,-0.1913614236,0.0838493167                                        | 1201.1876 | 1245.0409 | 1276.068  |
| H,0,4.7747477379,-0.4117877933,-0.9207262586                                       | 1285.1839 | 1305.8362 | 1325.7617 |
| H,0,4.9008638709,0.7089823244,0.4424885717                                         | 1334.8672 | 1344.235  | 1383.89   |
| H,0,4.7026136447,-1.028797219,0.7189711857                                         | 1391.0761 | 1394.5765 | 1406.8023 |
| C,0,-1.4245703931,0.338472395,-0.4665131304                                        | 1421.6054 | 1465.3302 | 1480.6797 |
| C,0,-2.0012446684,1.6979935568,-0.8649635852                                       | 1484.0317 | 1486.9376 | 1489.6787 |
| H,0,-3.0855789268,1.6633305916,-0.7821197958                                       | 1497.4055 | 1497.8175 | 1503.7666 |
| H,0,-1.6156669211,2.5169991183,-0.2599736679                                       | 1512.2301 | 1760.2017 | 3006.0177 |
| H,0,-1.7441843511,1.892145758,-1.9074669204                                        | 3020.7654 | 3024.4222 | 3038.9867 |
| C,0,-1.9070469744,0.2262647022,1.3749022482                                        | 3040.2147 | 3051.8776 | 3074.0124 |
| H,0,-1.1823181517,-0.521533843,1.6714562677                                        | 3078.5006 | 3095.4863 | 3123.4976 |
| H,0,-1.8864074828,1.2067552945,1.8327779495                                        | 3125.3433 | 3126.9661 | 3131.0193 |
| O,0,-3.1278069523,-1.3622741117,0.6020672875                                       | 3144.1713 | 3149.3638 | 3252.4629 |
| O,0,-2.0261849693,-0.6789779831,-0.9329312594                                      |           |           |           |
| O,0,-3.1325410871,-0.2113413045,1.1983669243                                       |           |           |           |
| UM06-2X/6-311++G(2df,2p): E = -615.8361843 Hartree                                 |           |           |           |
| RHF-UCCSD(T)-F12a/cc-pVDZ-F12 // M06-2X/6-311++G(2df,2p): E = -615.1297996 Hartree |           |           |           |
| TS_POZ5_CH2O-Syn-2c                                                                |           |           |           |
| 0,1                                                                                |           |           |           |
| C,0,0.5207173105,-1.0398279205,0.2749279149                                        | -541.8622 | 42.3714   | 83.9769   |
| C,0,1.969113627,-1.3107706124,-0.1182774442                                        | 160.8145  | 172.0858  | 174.8875  |
| C,0,2.8560187155,-0.1043540129,0.0261612902                                        | 242.2856  | 250.2638  | 278.0808  |
| C,0,2.3399367276,1.1110193654,0.1739022047                                         | 284.1354  | 288.921   | 310.2991  |
| C,0,0.8675223295,1.4182065599,0.1519426148                                         | 321.5372  | 359.0101  | 403.357   |
| C,0,0.0379672281,0.2520940741,-0.3994301919                                        | 435.6023  | 442.1792  | 500.2398  |
| H,0,2.3683413204,-2.122909867,0.4947891713                                         | 537.4314  | 557.2258  | 586.3138  |
| H,0,2.0188918577,-1.6708681686,-1.1522724298                                       | 653.1524  | 679.7491  | 786.0125  |
| H,0,0.2543872982,0.1550366378,-1.4734844607                                        | 796.8767  | 824.5914  | 887.2246  |
| H,0,0.4667462937,-0.9156729048,1.3600287243                                        | 922.1146  | 939.2112  | 941.9805  |
| H,0,3.0055528119,1.958226962,0.3019981253                                          | 990.5893  | 995.5552  | 1005.6372 |
| H,0,0.7120752278,2.3198299746,-0.4419089704                                        | 1042.427  | 1048.8246 | 1078.3492 |
| H,0,0.5270329451,1.6621985251,1.1664981167                                         | 1108.5244 | 1131.3482 | 1161.9805 |
| H,0,-0.1088407121,-1.8803893534,0.0136485251                                       | 1180.4062 | 1191.0613 | 1224.9464 |
| C,0,4.3334313377,-0.3563501065,-0.0054961265                                       | 1236.7943 | 1246.0269 | 1276.7211 |
| H,0,4.6133503227,-0.8693651849,-0.9286592066                                       | 1281.6992 | 1312.576  | 1323.8672 |
| H,0,4.9017019068,0.5696659017,0.060166589                                          | 1340.7079 | 1347.1774 | 1367.8296 |
| H,0,4.6314496788,-1.0073251806,0.8193062615                                        | 1398.0523 | 1410.5919 | 1418.6139 |
| C,0,-1.4570544106,0.5898212765,-0.3805772541                                       | 1420.4967 | 1426.775  | 1477.1162 |
| C,0,-1.8620421877,2.0365384452,-0.4840309788                                       | 1481.4269 | 1483.9193 | 1492.212  |
| H,0,-2.940356106,2.1044328131,-0.6058466135                                        | 1496.2249 | 1499.9268 | 1505.8653 |
| H,0,-1.5705641005,2.5763452853,0.4144814279                                        | 1560.0162 | 1767.9682 | 2984.8055 |
| H,0,-1.3783390663,2.5132279887,-1.3371385585                                       | 2994.3269 | 3009.1087 | 3030.976  |
| C,0,-2.1643361404,-0.1221165714,1.2033504955                                       | 3034.3035 | 3049.6911 | 3056.7785 |
| H,0,-1.3112973448,0.1917418859,1.8227066079                                        | 3065.0889 | 3068.9652 | 3083.2692 |
| H,0,-3.0636780637,0.4969635401,1.3131749952                                        | 3086.9579 | 3127.2885 | 3138.9596 |
| O,0,-2.0701708962,-1.4172455112,-1.0144338202                                      | 3145.2371 | 3161.7881 | 3190.919  |
| O,0,-2.2694373136,-0.1424479766,-1.1487493859                                      |           |           |           |
| O,0,-2.3056964272,-1.3582420346,0.9687328369                                       |           |           |           |
| UM06-2X/6-311++G(2df,2p): E = -615.8387887 Hartree                                 |           |           |           |
| RHF-UCCSD(T)-F12a/cc-pVDZ-F12 // M06-2X/6-311++G(2df,2p): E = -615.130348 Hartree  |           |           |           |
| TS_POZ6_CH2O-Anti-2c                                                               |           |           |           |



|                                                                                    |                               |
|------------------------------------------------------------------------------------|-------------------------------|
| 0,1                                                                                |                               |
| C,0,0.6495850198,-1.1664488965,-0.1727870603                                       | -553.2621 60.9813 64.7612     |
| C,0,2.1325339429,-1.2150408075,-0.5277932284                                       | 147.4877 159.2432 174.8053    |
| C,0,2.9241644559,-0.0775736859,0.0627828425                                        | 192.3321 204.5687 233.5822    |
| C,0,2.3276050688,0.987459688,0.5883510022                                          | 277.0188 295.5502 308.3125    |
| C,0,0.8377995548,1.1933368986,0.625774211                                          | 345.5736 357.159 402.7015     |
| C,0,0.1172467066,0.2556931982,-0.3501642215                                        | 435.7249 461.6477 481.7472    |
| H,0,2.5629883073,-2.1614637466,-0.1909132265                                       | 522.7941 565.0413 596.7787    |
| H,0,2.2589539486,-1.2053667271,-1.6162850618                                       | 634.2295 739.3736 781.6315    |
| H,0,0.3749586005,0.5890410418,-1.3647071336                                        | 808.1901 824.4407 896.2547    |
| H,0,0.5104750313,-1.4698517346,0.8683794212                                        | 900.5429 938.5859 940.3019    |
| H,0,2.935745042,1.7741323221,1.0219754239                                          | 987.6902 995.0114 1029.8209   |
| H,0,0.613919698,2.2358662787,0.3918095995                                          | 1043.6317 1050.4456 1077.5046 |
| H,0,0.47417105,1.0230907967,1.6441031311                                           | 1106.8539 1140.1272 1149.1201 |
| H,0,0.0947860977,-1.8719134772,-0.7874721997                                       | 1182.6322 1190.9945 1216.1953 |
| C,0,4.4157690974,-0.2238025763,0.0139009698                                        | 1239.4414 1248.6832 1278.1774 |
| H,0,4.7535194213,-0.3621878483,-1.0159304663                                       | 1293.5679 1325.1645 1333.3431 |
| H,0,4.9196298652,0.6476791193,0.4276587152                                         | 1345.6607 1356.4882 1376.0055 |
| H,0,4.7345479591,-1.1067460295,0.5722006264                                        | 1404.3561 1409.2863 1418.1436 |
| C,0,-1.3905422135,0.3717262708,-0.2495963967                                       | 1419.4888 1427.9332 1475.6482 |
| C,0,-2.0315497436,1.6439198653,-0.7411166022                                       | 1480.693 1484.4503 1488.4164  |
| H,0,-3.0311875556,1.7654094392,-0.3365124516                                       | 1496.2594 1502.4466 1505.9589 |
| H,0,-1.4149308595,2.4977968046,-0.472382999                                        | 1558.4059 1766.6076 2985.2485 |
| H,0,-2.1042890787,1.5871532284,-1.82987752                                         | 3006.5304 3032.5798 3037.3726 |
| C,0,-2.0258696173,0.260712684,1.523839963                                          | 3039.8744 3050.1514 3054.6088 |
| H,0,-1.3216969237,-0.4531854723,1.9691383702                                       | 3067.988 3077.4294 3091.0932  |
| H,0,-1.821803251,1.3163538725,1.7475308205                                         | 3092.6288 3123.0475 3129.8015 |
| O,0,-3.2993689359,-0.6575896694,-0.4991837051                                      | 3137.5569 3152.2877 3175.616  |
| O,0,-2.007622596,-0.7582872432,-0.6072950058                                       |                               |
| O,0,-3.2372422123,-0.0859781637,1.3859232319                                       |                               |
| UM06-2X/6-311++G(2df,2p): E = -615.842455 Hartree                                  |                               |
| RHF-UCCSD(T)-F12a/cc-pVDZ-F12 // M06-2X/6-311++G(2df,2p): E = -615.1343081 Hartree |                               |
| TS_POZ6_CH2OO-AMCH                                                                 |                               |
| 0,1                                                                                |                               |
| C,0,0.5089910024,-1.0642687723,-0.0316948971                                       | -545.8437 69.1023 88.2743     |
| C,0,1.9711116494,-1.2910682532,-0.3974920201                                       | 100.8436 163.8677 176.1787    |
| C,0,2.8556879521,-0.1497671021,0.0368542618                                        | 196.7081 237.551 276.5204     |
| C,0,2.3521400596,1.0286968531,0.3933115541                                         | 292.3929 294.5547 303.9404    |
| C,0,0.8875241167,1.375962869,0.3578715228                                          | 324.4326 356.5256 408.2379    |
| C,0,0.0856301037,0.3438590982,-0.4327528117                                        | 452.7675 495.7783 519.7167    |
| H,0,2.3363249694,-2.2165063559,0.0554154679                                        | 528.8847 552.9346 583.9978    |
| H,0,2.0744500516,-1.4284997129,-1.4795451472                                       | 634.2636 661.2631 784.5873    |
| H,0,0.3517311885,0.4727672641,-1.4897690525                                        | 815.3501 830.3393 904.0503    |
| H,0,0.3974369267,-1.1837754226,1.0500407193                                        | 911.6427 937.8342 945.5795    |
| H,0,3.0298542557,1.8126503677,0.7155456996                                         | 976.9404 989.8175 1015.4936   |
| H,0,0.7704818579,2.3682440263,-0.0836087086                                        | 1045.21 1051.3802 1078.1207   |
| H,0,0.5086789036,1.4620323399,1.3838723245                                         | 1094.2033 1118.1276 1143.0503 |
| H,0,-0.1384608405,-1.7986338289,-0.5102274636                                      | 1163.166 1180.1419 1191.7209  |
| C,0,4.3300497064,-0.4249416558,0.0351121264                                        | 1209.7554 1247.083 1283.1311  |
| H,0,4.6581064925,-0.7433570302,-0.9573733924                                       | 1290.6423 1309.7064 1326.3151 |
| H,0,4.9046255184,0.4542653621,0.3211146015                                         | 1336.3394 1346.7019 1386.0949 |
| H,0,4.5730973074,-1.2382000754,0.7225775083                                        | 1391.6654 1405.6934 1410.4626 |
| C,0,-1.4428210388,0.5556745978,-0.421634902                                        | 1419.7735 1465.5298 1480.5816 |
| C,0,-1.9112412857,2.0130194266,-0.4891452727                                       | 1481.9058 1484.8801 1496.2976 |
| H,0,-2.994277356,2.0330014253,-0.5874948806                                        | 1497.367 1498.4766 1505.6214  |
| H,0,-1.6068378797,2.5979750321,0.3786771607                                        | 1518.348 1765.2779 3008.0828  |
| H,0,-1.4745210463,2.4738856699,-1.3765911329                                       | 3023.7389 3028.9751 3036.5211 |

|                                                                                    |           |           |           |
|------------------------------------------------------------------------------------|-----------|-----------|-----------|
| C,0,-2.0200067449,0.1271450617,1.3477543567                                        | 3049.0159 | 3049.9195 | 3066.6596 |
| H,0,-1.2594451755,0.3739517618,2.0774809961                                        | 3080.9626 | 3092.9417 | 3119.3238 |
| H,0,-2.937815095,0.701177299,1.3176258013                                          | 3122.3643 | 3124.415  | 3144.8721 |
| O,0,-3.0359656614,-1.4312251565,0.2732321688                                       | 3151.7757 | 3153.9337 | 3270.3512 |
| O,0,-2.123501979,-0.281928678,-1.093704064                                         |           |           |           |
| O,0,-2.1590271795,-1.1690834208,1.1910630056                                       |           |           |           |
| UM06-2X/6-311++G(2df,2p): E = -615.8366381 Hartree                                 |           |           |           |
| RHF-UCCSD(T)-F12a/cc-pVDZ-F12 // M06-2X/6-311++G(2df,2p): E = -615.1293502 Hartree |           |           |           |
| TS_POZ5_POZ6                                                                       |           |           |           |
| 0,1                                                                                |           |           |           |
| C,0,0.6186814892,-1.089688059,0.0906997317                                         | -139.2161 | 50.2159   | 79.3771   |
| C,0,2.0761433665,-1.251396758,-0.3243696065                                        | 134.0503  | 180.0608  | 186.1275  |
| C,0,2.9052792513,-0.042742629,0.0295767357                                         | 239.2927  | 258.6788  | 261.3016  |
| C,0,2.3406827676,1.118784726,0.3472688079                                          | 289.1774  | 295.9691  | 326.3169  |
| C,0,0.8589166043,1.3803951393,0.3293174326                                         | 376.1089  | 397.8908  | 446.8905  |
| C,0,0.0960604229,0.2647060394,-0.3880356589                                        | 473.3718  | 511.9168  | 534.1158  |
| H,0,2.5098500156,-2.1332527936,0.1541838229                                        | 605.9474  | 720.6076  | 748.4389  |
| H,0,2.1467130421,-1.4327047183,-1.4026713433                                       | 787.5603  | 811.1329  | 829.0957  |
| H,0,0.3207080114,0.3452198904,-1.4578809727                                        | 865.6105  | 913.9604  | 935.9135  |
| H,0,0.5661557772,-1.134698198,1.181918638                                          | 942.0655  | 950.6579  | 968.3928  |
| H,0,2.9760432812,1.9545770599,0.6216316335                                         | 989.9689  | 993.074   | 1029.5107 |
| H,0,0.6763512374,2.3398942915,-0.1576870944                                        | 1040.7855 | 1051.1451 | 1075.8349 |
| H,0,0.4867282326,1.4870193218,1.3565454062                                         | 1097.4475 | 1110.5563 | 1148.6129 |
| H,0,0.0075478485,-1.8999967043,-0.3048522233                                       | 1159.9413 | 1177.0089 | 1188.9589 |
| C,0,4.3922021453,-0.2352251067,0.0020937659                                        | 1213.3451 | 1249.9139 | 1273.3284 |
| H,0,4.7145047522,-0.5845016245,-0.9818319824                                       | 1279.1498 | 1291.9778 | 1333.6762 |
| H,0,4.9221672719,0.687691965,0.2300349708                                          | 1338.5089 | 1348.1346 | 1382.0048 |
| H,0,4.6964072706,-0.9982475775,0.7220675878                                        | 1387.6433 | 1404.8168 | 1413.8936 |
| C,0,-1.4208579562,0.4381397552,-0.2687905442                                       | 1417.96   | 1419.5481 | 1480.7274 |
| C,0,-1.9073983259,1.7990741268,-0.7504781609                                       | 1486.8954 | 1488.6457 | 1493.6557 |
| H,0,-2.9940929878,1.798527607,-0.8079452991                                        | 1496.4571 | 1500.8627 | 1508.6107 |
| H,0,-1.5952489875,2.5930802887,-0.0730456665                                       | 1511.3291 | 1762.773  | 3005.5888 |
| H,0,-1.5038328878,2.0059000234,-1.7413136731                                       | 3029.0052 | 3031.6522 | 3036.0285 |
| C,0,-2.0337315043,0.0736228829,1.0812048902                                        | 3047.1227 | 3064.1443 | 3072.9399 |
| H,0,-1.5647346626,-0.8083010097,1.5194934264                                       | 3079.8682 | 3088.5119 | 3097.7428 |
| H,0,-2.0583942508,0.900528247,1.7877894356                                         | 3121.8971 | 3133.3468 | 3143.3796 |
| O,0,-3.2942707061,-0.8625457741,-0.5312957356                                      | 3147.8173 | 3148.8151 | 3168.1407 |
| O,0,-1.9987860822,-0.5893787663,-1.0720811031                                      |           |           |           |
| O,0,-3.3702437067,-0.1888754754,0.725038949                                        |           |           |           |
| UM06-2X/6-311++G(2df,2p): E = -615.8752338 Hartree                                 |           |           |           |
| RHF-UCCSD(T)-F12a/cc-pVDZ-F12 // M06-2X/6-311++G(2df,2p): E = -615.1542666 Hartree |           |           |           |
| Anti-2c                                                                            |           |           |           |
| 0,1                                                                                |           |           |           |
| C,0,0.8096572581,-1.2600536999,0.0475796495                                        | 52.9535   | 76.1691   | 125.0075  |
| C,0,2.323193197,-1.3051041041,-0.13252851                                          | 160.6272  | 171.7741  | 203.174   |
| C,0,2.9870911833,0.0272779797,0.1074528051                                         | 244.3935  | 284.4215  | 303.4784  |
| C,0,2.2887797391,1.1564990312,0.1763651007                                         | 324.4951  | 353.5704  | 396.1723  |
| C,0,0.7989810425,1.2459159687,-0.0047584449                                        | 438.0682  | 466.7637  | 523.3438  |
| C,0,0.2417443896,-0.0331728454,-0.6564445946                                       | 551.8204  | 609.6816  | 706.8801  |
| H,0,2.7556569188,-2.0445311818,0.5458064868                                        | 779.0619  | 809.8896  | 823.9067  |
| H,0,2.5763863304,-1.6475667896,-1.1422396822                                       | 904.756   | 927.9937  | 938.5428  |
| H,0,0.5647028972,-0.0346738319,-1.7047645742                                       | 968.5979  | 992.7992  | 1019.068  |
| H,0,0.5627593365,-1.1999682248,1.1095960058                                        | 1039.8762 | 1048.1506 | 1059.4058 |
| H,0,2.8083441189,2.0884486282,0.3720585642                                         | 1082.1398 | 1106.5223 | 1143.5058 |
| H,0,0.5526399645,2.1185811053,-0.6127881009                                        | 1175.9798 | 1187.8195 | 1223.6818 |
| H,0,0.3099085531,1.3978867764,0.9635734349                                         | 1271.6172 | 1291.3119 | 1317.0741 |
| H,0,0.3470544006,-2.1702324196,-0.3327643758                                       | 1339.7769 | 1355.0572 | 1363.0194 |

|                                                                                    |           |           |           |
|------------------------------------------------------------------------------------|-----------|-----------|-----------|
| C,0,4.4784946443,-0.0057408422,0.259148759                                         | 1393.4627 | 1408.4381 | 1420.9535 |
| H,0,4.9426639108,-0.4669630581,-0.6157566846                                       | 1424.1172 | 1441.6331 | 1478.5508 |
| H,0,4.8929409405,0.9929027603,0.3832917461                                         | 1481.5497 | 1483.6625 | 1490.5323 |
| H,0,4.7637449189,-0.6098226612,1.1230881128                                        | 1495.798  | 1508.6398 | 1641.2897 |
| C,0,-1.2491371624,0.0258323318,-0.6649357839                                       | 1766.2976 | 3026.6343 | 3027.4773 |
| C,0,-2.021817076,1.0090438865,-1.4461924614                                        | 3036.5372 | 3039.0311 | 3046.1764 |
| H,0,-2.6191878845,1.6104214123,-0.756823787                                        | 3064.4724 | 3076.6368 | 3079.7775 |
| H,0,-1.3750309883,1.6303255441,-2.0580069462                                       | 3091.2032 | 3098.8387 | 3130.4458 |
| H,0,-2.7518934158,0.4662218,-2.0504683205                                          | 3130.9003 | 3153.4782 | 3170.1805 |
| O,0,-3.2230310373,-0.7180865073,0.087916673                                        |           |           |           |
| O,0,-1.8574351797,-0.7917800583,0.0584269284                                       |           |           |           |
| UM06-2X/6-311++G(2df,2p): E = -501.4215164 Hartree                                 |           |           |           |
| RHF-UCCSD(T)-F12a/cc-pVDZ-F12 // M06-2X/6-311++G(2df,2p): E = -500.8206828 Hartree |           |           |           |
| Syn-2c                                                                             |           |           |           |
| 0,1                                                                                |           |           |           |
| C,0,0.3905084037,-0.8017662515,0.2377227847                                        | 69.7392   | 80.0255   | 136.6909  |
| C,0,1.8329984538,-1.2142895519,-0.0246741625                                       | 176.2402  | 194.1596  | 195.6221  |
| C,0,2.7912539361,-0.0508767876,-0.0098480245                                       | 255.5625  | 266.9007  | 298.6076  |
| C,0,2.3689695425,1.2092354215,-0.0619984043                                        | 309.3008  | 343.5394  | 413.2239  |
| C,0,0.9248451994,1.6178140994,-0.1731419676                                        | 435.4878  | 470.3521  | 519.3688  |
| C,0,0.0595142934,0.4416557392,-0.6141935192                                        | 604.8971  | 624.6881  | 650.0353  |
| H,0,2.1506235853,-1.948616068,0.7202173373                                         | 777.0865  | 798.0473  | 824.8771  |
| H,0,1.9013504354,-1.7206313161,-0.9932367991                                       | 913.4467  | 934.3772  | 936.4733  |
| H,0,0.2634859132,0.1736183646,-1.6553258078                                        | 956.9154  | 976.7095  | 1030.1265 |
| H,0,0.265654,-0.5427896798,1.2933104453                                            | 1039.6808 | 1051.2703 | 1057.1589 |
| H,0,3.0990649434,2.0107717787,-0.0318776591                                        | 1079.2614 | 1102.3156 | 1141.5261 |
| H,0,0.833245243,2.442347577,-0.8845732728                                          | 1174.7697 | 1186.8133 | 1242.1634 |
| H,0,0.582347917,2.0073876097,0.7916730696                                          | 1282.7711 | 1294.4299 | 1309.7344 |
| H,0,-0.2952330317,-1.6094296125,-0.0101196911                                      | 1334.2015 | 1342.7367 | 1365.5151 |
| C,0,4.2465592963,-0.406036674,0.0587771493                                         | 1402.3605 | 1407.1031 | 1422.6436 |
| H,0,4.5160182369,-1.0752539765,-0.7616544125                                       | 1427.7115 | 1464.6421 | 1471.752  |
| H,0,4.8795686984,0.4777025862,0.0045697717                                         | 1475.0037 | 1485.0847 | 1487.1977 |
| H,0,4.4705805307,-0.9377028557,0.9862345789                                        | 1496.8059 | 1499.294  | 1637.3682 |
| C,0,-1.3984294554,0.6936580917,-0.5442469448                                       | 1761.3462 | 3025.0145 | 3026.9081 |
| C,0,-2.02985773,1.7472529045,0.292721756                                           | 3043.1374 | 3044.3376 | 3048.609  |
| H,0,-3.1110749993,1.7045001441,0.2004491839                                        | 3058.9634 | 3066.2122 | 3072.8305 |
| H,0,-1.7427206768,1.6058263617,1.3367791784                                        | 3097.8263 | 3109.1471 | 3116.4521 |
| H,0,-1.6683008104,2.7312628736,-0.0088944168                                       | 3137.5585 | 3151.6364 | 3167.7002 |
| O,0,-1.6827212945,-1.0377095224,-1.9601163086                                      |           |           |           |
| O,0,-2.1921526302,-0.029689256,-1.1890388642                                       |           |           |           |
| UM06-2X/6-311++G(2df,2p): E = -501.4206353 Hartree                                 |           |           |           |
| RHF-UCCSD(T)-F12a/cc-pVDZ-F12 // M06-2X/6-311++G(2df,2p): E = -500.819936 Hartree  |           |           |           |
| TS_Anti-2c_dioxirane3                                                              |           |           |           |
| 0,1                                                                                |           |           |           |
| C,0,-0.2995047927,-1.1691370914,0.3038982226                                       | -491.4528 | 47.737    | 68.5126   |
| C,0,-1.7934856472,-1.1101815185,0.599144557                                        | 122.5633  | 171.7847  | 187.5398  |
| C,0,-2.4863462549,0.0257476692,-0.1096294691                                       | 237.5061  | 240.9121  | 289.2423  |
| C,0,-1.8039193005,1.0195821204,-0.6691156032                                       | 307.293   | 338.6957  | 385.8888  |
| C,0,-0.3083476786,1.1573397611,-0.6368201914                                       | 438.3341  | 461.7287  | 513.468   |
| C,0,0.3062752557,0.2306246156,0.4401227668                                         | 568.6176  | 581.3782  | 650.8451  |
| H,0,-2.2637425565,-2.0516696728,0.3046213866                                       | 775.4898  | 817.9624  | 819.5144  |
| H,0,-1.9674541253,-1.0163461671,1.6769298179                                       | 841.6863  | 905.5197  | 932.1066  |
| H,0,0.0825003657,0.6460843408,1.4254752693                                         | 946.0685  | 983.1235  | 991.0615  |
| H,0,-0.1316390611,-1.5200284472,-0.7149319196                                      | 1008.1903 | 1040.9421 | 1051.5702 |
| H,0,-2.3434989723,1.8036613691,-1.189739413                                        | 1075.8887 | 1103.0116 | 1121.345  |
| H,0,-0.0339687382,2.1937787611,-0.4317817177                                       | 1173.5114 | 1187.8506 | 1211.191  |
| H,0,0.1318148526,0.9114471621,-1.6078354596                                        | 1258.956  | 1281.8834 | 1319.9624 |

|                                                                                    |            |           |           |
|------------------------------------------------------------------------------------|------------|-----------|-----------|
| H,0,0.1966650151,-1.8709190117,0.9750440452                                        | 1339.0113  | 1353.1187 | 1364.1243 |
| C,0,-3.9838620522,-0.0419960472,-0.141783072                                       | 1398.5279  | 1410.329  | 1421.0471 |
| H,0,-4.3873005613,-0.1082820361,0.8715044318                                       | 1426.5279  | 1443.3155 | 1466.4561 |
| H,0,-4.4153095963,0.8311784969,-0.6275063995                                       | 1478.9726  | 1485.7684 | 1487.7902 |
| H,0,-4.3179454826,-0.9351352541,-0.6742239509                                      | 1495.9243  | 1505.9885 | 1596.8519 |
| C,0,1.7735755416,0.253403598,0.2088912201                                          | 1767.3381  | 3032.063  | 3033.0462 |
| C,0,2.645833552,1.0930789843,1.0705111267                                          | 3036.6451  | 3048.4967 | 3062.7153 |
| H,0,2.389210643,2.1455809584,0.9383731567                                          | 3068.8325  | 3072.5277 | 3090.2842 |
| H,0,2.4310904217,0.8379367236,2.1126955164                                         | 3097.6201  | 3112.723  | 3117.2048 |
| H,0,3.6891946071,0.9476234593,0.8190633512                                         | 3133.1613  | 3145.1278 | 3193.4601 |
| O,0,2.9069756985,0.5775910478,-1.4059651558                                        |            |           |           |
| O,0,2.2193783466,-0.5184361316,-0.6973457964                                       |            |           |           |
| UM06-2X/6-311++G(2df,2p): E = -501.3857048 Hartree                                 |            |           |           |
| RHF-UCCSD(T)-F12a/cc-pVDZ-F12 // M06-2X/6-311++G(2df,2p): E = -500.7882949 Hartree |            |           |           |
| TS_Anti-2c-H-shift                                                                 |            |           |           |
| 0,1                                                                                |            |           |           |
| C,0,-0.3004084354,-1.1324449173,0.0422157872                                       | -1598.2873 | 35.5703   | 74.3254   |
| C,0,-1.7776905976,-1.1651896463,0.4197890424                                       | 129.5302   | 162.1458  | 174.1885  |
| C,0,-2.5294004426,0.0646842939,-0.0232915313                                       | 244.6808   | 290.1383  | 303.1694  |
| C,0,-1.9003416478,1.1634511987,-0.4292947897                                       | 323.4831   | 394.8536  | 439.3834  |
| C,0,-0.4064834051,1.3237224247,-0.4606239658                                       | 474.1156   | 518.4238  | 537.0546  |
| C,0,0.2868266749,0.2352792602,0.3762331428                                         | 579.258    | 629.356   | 742.2102  |
| H,0,-2.2530842636,-2.0478240062,-0.0150522449                                      | 777.8103   | 797.5866  | 824.4178  |
| H,0,-1.8897923083,-1.2741316485,1.5045053963                                       | 849.5437   | 890.618   | 936.6899  |
| H,0,0.0986843528,0.4627245349,1.4317458036                                         | 941.7187   | 964.5161  | 983.6102  |
| H,0,-0.1872514738,-1.3115739268,-1.029197755                                       | 1011.5866  | 1040.8333 | 1049.7071 |
| H,0,-2.4855312949,2.0158187265,-0.757995321                                        | 1065.0071  | 1085.886  | 1106.9802 |
| H,0,-0.1260549927,2.3099979398,-0.0865337376                                       | 1143.9317  | 1173.3101 | 1186.6786 |
| H,0,-0.0423191047,1.2726082469,-1.4924766132                                       | 1232.8971  | 1282.214  | 1296.8072 |
| H,0,0.2471319082,-1.9225631211,0.5551379644                                        | 1315.3006  | 1340.8464 | 1348.4324 |
| C,0,-4.024898832,-0.0330636562,0.0283683131                                        | 1360.9053  | 1390.5694 | 1409.7376 |
| H,0,-4.3570344882,-0.2987701277,1.0347373507                                       | 1420.2665  | 1429.5319 | 1479.6816 |
| H,0,-4.4999373754,0.9042552477,-0.2548660945                                       | 1483.3371  | 1487.9955 | 1496.3683 |
| H,0,-4.3827517132,-0.8193833143,-0.6398145643                                      | 1506.4996  | 1522.187  | 1557.4417 |
| C,0,1.7622505169,0.3342895951,0.1890019553                                         | 1765.3952  | 1899.8924 | 3027.3428 |
| C,0,2.6470466573,1.2706326509,0.763506038                                          | 3028.1597  | 3037.4886 | 3043.4762 |
| H,0,3.2387365723,1.844977459,0.0521653185                                          | 3063.3651  | 3075.7248 | 3082.1405 |
| H,0,2.2524334125,1.8573176863,1.581593137                                          | 3092.8105  | 3102.5197 | 3128      |
| H,0,3.5796559032,0.3450087993,0.6583580971                                         | 3129.4306  | 3162.1338 | 3204.2209 |
| O,0,3.7048274623,-0.5046053123,-0.4113057061                                       |            |           |           |
| O,0,2.321735615,-0.6284981474,-0.4571134035                                        |            |           |           |
| UM06-2X/6-311++G(2df,2p): E = -501.3968883 Hartree                                 |            |           |           |
| RHF-UCCSD(T)-F12a/cc-pVDZ-F12 // M06-2X/6-311++G(2df,2p): E = -500.7958486 Hartree |            |           |           |
| VHP4                                                                               |            |           |           |
| 0,1                                                                                |            |           |           |
| C,0,-0.2715260376,-1.0842056993,0.301929823                                        | 56.0784    | 66.0951   | 100.6137  |
| C,0,-1.7637299702,-1.094146753,0.6162155947                                        | 169.048    | 180.7912  | 185.6455  |
| C,0,-2.5138870687,0.0134667289,-0.0797471976                                       | 206.5463   | 239.8908  | 280.0776  |
| C,0,-1.8830456538,1.0411188362,-0.6400897871                                       | 323.0334   | 342.4264  | 382.4845  |
| C,0,-0.3932738756,1.240123182,-0.6172293039                                        | 440.7814   | 492.648   | 519.9806  |
| C,0,0.2810770558,0.3396324731,0.4249394258                                         | 596.9423   | 659.8711  | 702.4128  |
| H,0,-2.2003651295,-2.0547346784,0.3296821364                                       | 753.5204   | 776.4512  | 817.6898  |
| H,0,-1.9241924306,-1.0068313156,1.6969897432                                       | 822.9314   | 881.5892  | 928.4023  |
| H,0,0.0319985348,0.7183497968,1.4193114912                                         | 936.6948   | 944.6502  | 975.967   |
| H,0,-0.1086323812,-1.4386510668,-0.7181100872                                      | 998.1      | 1039.2437 | 1048.7184 |
| H,0,-2.467948612,1.8018108814,-1.1471504083                                        | 1069.1551  | 1083.4732 | 1106.0949 |
| H,0,-0.1616883699,2.2849550339,-0.399616611                                        | 1138.7201  | 1173.6241 | 1184.4985 |

|                                                                                    |                               |
|------------------------------------------------------------------------------------|-------------------------------|
| H,0,0.0278952269,1.033460863,-1.6053791948                                         | 1238.1371 1279.1344 1301.2361 |
| H,0,0.2667740961,-1.7570476161,0.9712890733                                        | 1316.2572 1323.8875 1341.5654 |
| C,0,-4.0079469307,-0.1206041666,-0.0943491494                                      | 1367.9807 1392.0294 1404.3689 |
| H,0,-4.3972719845,-0.1973119741,0.9239311054                                       | 1417.1991 1429.585 1449.7079  |
| H,0,-4.4831083031,0.7292761853,-0.5808598467                                       | 1481.0034 1483.5628 1485.7266 |
| H,0,-4.3089707261,-1.0318063523,-0.6164304909                                      | 1496.5909 1501.8603 1744.0629 |
| C,0,1.7776585711,0.3892110948,0.315034557                                          | 1762.8404 3027.0005 3033.1268 |
| C,0,2.6086164744,0.8736904345,1.2273981771                                         | 3037.2738 3049.5012 3056.4191 |
| H,0,3.6743101642,0.9071144412,1.0758110569                                         | 3066.9793 3076.0866 3087.3383 |
| H,0,2.1966636877,1.2680663725,2.1426274104                                         | 3102.203 3126.9089 3148.9085  |
| H,0,3.8287775281,-0.9638572234,-0.8123749042                                       | 3194.4771 3289.2395 3819.493  |
| O,0,3.5442878647,-0.0837637413,-1.0895526235                                       |                               |
| O,0,2.1522208997,-0.1496017469,-0.8892470698                                       |                               |
| UM06-2X/6-311++G(2df,2p): E = -501.4508055 Hartree                                 |                               |
| RHF-UCCSD(T)-F12a/cc-pVDZ-F12 // M06-2X/6-311++G(2df,2p): E = -500.8452513 Hartree |                               |
| Dioxirane3                                                                         |                               |
| 0,1                                                                                |                               |
| C,0,-0.2075590784,-1.1734368912,0.1413342133                                       | 37.4621 82.3086 164.3046      |
| C,0,-1.677652028,-1.1293294416,0.5424886985                                        | 187.6578 196.8412 226.3451    |
| C,0,-2.3804438,0.1064919834,0.0422438079                                           | 255.7622 294.2137 318.6798    |
| C,0,-1.7035110058,1.1603010179,-0.4036344021                                       | 344.0684 399.1007 424.8344    |
| C,0,-0.2035250379,1.2646372892,-0.4177050518                                       | 449.6682 503.0803 519.9498    |
| C,0,0.453865489,0.1702172885,0.4288639254                                          | 571.9484 643.5782 778.2175    |
| H,0,-2.195995441,-2.0121009131,0.1592743576                                        | 793.7905 825.6338 859.7168    |
| H,0,-1.778820081,-1.1775658495,1.6327585259                                        | 884.5675 936.697 944.9202     |
| H,0,0.3009678416,0.4187053338,1.4861340353                                         | 967.0004 991.4383 1019.1367   |
| H,0,-0.1253951762,-1.3798937137,-0.9277404887                                      | 1039.5395 1054.694 1068.1049  |
| H,0,-2.2522227471,2.0193827959,-0.775454348                                        | 1103.9194 1116.9154 1152.2956 |
| H,0,0.0880633935,2.2522904205,-0.0539027176                                        | 1177.1446 1190.4517 1222.0695 |
| H,0,0.1665335833,1.1976780596,-1.4482691275                                        | 1261.4712 1283.7887 1323.9115 |
| H,0,0.3140695761,-1.9736299172,0.663386874                                         | 1335.1562 1347.7564 1376.2201 |
| C,0,-3.8791390678,0.0690843718,0.0806408347                                        | 1407.0717 1411.8269 1420.2192 |
| H,0,-4.2310772637,-0.1368051616,1.0944524533                                       | 1424.5583 1452.5491 1481.1297 |
| H,0,-4.3157813782,1.0095327985,-0.2507059914                                       | 1485.0219 1489.673 1492.1429  |
| H,0,-4.2608699486,-0.7341812013,-0.5535705721                                      | 1498.717 1503.0785 1509.6393  |
| C,0,1.9493705245,0.1487146869,0.2040967024                                         | 1766.8303 3012.697 3024.1727  |
| C,0,2.7120421048,1.4244244299,0.4178916138                                         | 3031.3775 3046.2531 3066.8956 |
| H,0,2.499346422,1.8294076665,1.4073914459                                          | 3068.9491 3072.4589 3085.4147 |
| H,0,3.775277894,1.2200172025,0.3254724639                                          | 3100.9603 3120.7431 3137.5133 |
| H,0,2.4230305751,2.166517491,-0.3249934336                                         | 3147.1844 3157.9513 3168.2875 |
| O,0,2.4107224771,-0.6516272648,-0.8333156413                                       |                               |
| O,0,2.6175735524,-1.0113888318,0.5712793323                                        |                               |
| UM06-2X/6-311++G(2df,2p): E = -501.4583354 Hartree                                 |                               |
| RHF-UCCSD(T)-F12a/cc-pVDZ-F12 // M06-2X/6-311++G(2df,2p): E = -500.8536629 Hartree |                               |
| AMCH                                                                               |                               |
| 0,1                                                                                |                               |
| C,0,0.5171651919,-0.9999711033,-0.3332238607                                       | 60.1921 82.2107 164.6753      |
| C,0,2.0054131465,-1.1769964116,-0.6108556466                                       | 173.9776 185.2757 197.3513    |
| C,0,2.8556590029,-0.117140818,0.0422079399                                         | 266.4752 305.7978 329.698     |
| C,0,2.3269546356,0.9987856473,0.5351194024                                         | 361.9986 438.8128 448.8452    |
| C,0,0.8655568668,1.3487760765,0.4702912059                                         | 521.8239 563.0846 609.0625    |
| C,0,0.1111979879,0.4534217149,-0.5234197962                                        | 658.4453 778.2797 804.6821    |
| H,0,2.3375535278,-2.1601390363,-0.2671626521                                       | 819.3031 911.9046 925.216     |
| H,0,2.1960322173,-1.1630308101,-1.6901580909                                       | 936.854 968.1296 997.5865     |
| H,0,0.3905083724,0.7773527429,-1.5344797591                                        | 1021.0708 1047.3341 1052.0598 |
| H,0,0.2919369523,-1.2903681253,0.6957932427                                        | 1086.462 1111.4324 1153.4009  |
| H,0,2.978035138,1.7227999467,1.0141780963                                          | 1175.5682 1186.5485 1196.3308 |

|                                                                                    |           |           |           |
|------------------------------------------------------------------------------------|-----------|-----------|-----------|
| H,0,0.7574625337,2.3998038753,0.1938080398                                         | 1256.6744 | 1281.0391 | 1312.6897 |
| H,0,0.4155645625,1.2481084652,1.4653923962                                         | 1329.5596 | 1344.9071 | 1368.104  |
| H,0,-0.0803169409,-1.6461726356,-0.9746039427                                      | 1390.1296 | 1407.0482 | 1414.0941 |
| C,0,4.3271496788,-0.4015641855,0.0958357126                                        | 1420.3762 | 1475.6609 | 1479.9746 |
| H,0,4.7183026497,-0.586471443,-0.9075459238                                        | 1482.056  | 1485.7673 | 1488.8943 |
| H,0,4.8831287812,0.4245977201,0.5352895741                                         | 1496.4476 | 1501.9382 | 1768.0789 |
| H,0,4.5233425138,-1.3028911826,0.6808743836                                        | 1842.7324 | 3014.3745 | 3021.6282 |
| C,0,-1.3876575592,0.655886981,-0.3962061798                                        | 3025.3544 | 3039.6635 | 3059.4763 |
| C,0,-1.9030819749,2.0690411817,-0.5544067574                                       | 3061.258  | 3070.7575 | 3072.6299 |
| H,0,-2.9739011116,2.0481988636,-0.7349919009                                       | 3094.0408 | 3116.5434 | 3128.6887 |
| H,0,-1.7119261367,2.6216621061,0.3675721242                                        | 3130.9538 | 3148.0851 | 3171.5818 |
| H,0,-1.3872982757,2.5912988645,-1.3599535022                                       |           |           |           |
| O,0,-2.13559376,-0.2588654345,-0.1610081057                                        |           |           |           |
| UM06-2X/6-311++G(2df,2p): E = -426.3454185 Hartree                                 |           |           |           |
| RHF-UCCSD(T)-F12a/cc-pVDZ-F12 // M06-2X/6-311++G(2df,2p): E = -425.8087917 Hartree |           |           |           |
